# Supplementary material for: Flavonoid biosynthesis controls fiber color in naturally colored cotton
Source: PeerJ. 2018 Apr 18;6:e4537. doi: 10.7717/peerj.4537 (PMC5910794; doi:10.7717/peerj.4537)
Supplement: Table S4 — A comparison between BCF and WCF indicated that the significantly differentially expression genes were divided into nine clusters. [file peerj-06-4537-s005.xls]

## Sheet: Sheet1
Supplementary Table 4. Clustering of the transcripts that are differentially expressed in brown and white fibers between 0 and 12 DPA.
	BCF (log2(fold change))	WCF (log2(fold change))	category	JGI_gene_ID	NCBI_gene_ID
Gorai.006G166800-JGI_221_v2.1	4.19677	4.53189	1	Gorai.006G166800	gi|118132689|gb|EF079902.1|_Gossypium_hirsutum_PIP2_protein_(PIP2;2)_mRNA,_complete_cds
Gorai.011G031300-JGI_221_v2.1	5.37245	4.3095	1	Gorai.011G031300	gi|519745960|gb|JX614402.1|_Gossypium_hirsutum_clone_NBRI_GE57751_microsatellite_sequence
Gorai.008G026100-JGI_221_v2.1	6.34331	4.7262	1	Gorai.008G026100	gi|57282620|emb|AJ606074.1|_Gossypium_hirsutum_mRNA_for_cytochrome_P450-like_protein_(cyP450_gene),_strain_Xuzhou_142
Gorai.006G156600-JGI_221_v2.1	4.31356	4.42664	1	Gorai.006G156600	___NoMatchedTerm___
Gorai.005G038200-JGI_221_v2.1	4.97652	4.0871	1	Gorai.005G038200	gi|519748361|gb|JX615483.1|_Gossypium_hirsutum_clone_NBRI_GE59485_microsatellite_sequence
Gorai.004G016500-JGI_221_v2.1	6.50996	4.47177	1	Gorai.004G016500	___NoMatchedTerm___
Gorai.011G128500-JGI_221_v2.1	5.90975	4.71524	1	Gorai.011G128500	gi|187936325|gb|EU593897.1|_Gossypium_hirsutum_cultivar_CIM707_alpha_expansin_(EXPA8)_mRNA,_complete_cds
Gorai.011G128100-JGI_221_v2.1	4.6253	4.8872	1	Gorai.011G128100	gi|2829203|gb|AF044204.1|AF044204_Gossypium_hirsutum_cultivar_Siokra_1-2_lipid_transfer_protein_precursor_(LTP)_mRNA,_complete_cds
Gorai.009G110500-JGI_221_v2.1	4.06415	5.00719	1	Gorai.009G110500	___NoMatchedTerm___
Gorai.009G052200-JGI_221_v2.1	5.94722	4.6596	1	Gorai.009G052200	gi|18447760|gb|AY072821.1|_Gossypium_hirsutum_dehydration-induced_protein_RD22-like_protein_(RDL)_mRNA,_complete_cds
Gorai.008G268500-JGI_221_v2.1	5.25367	4.41031	1	Gorai.008G268500	gi|317175735|gb|HQ527954.1|_Gossypium_herbaceum_clone_NBRI_C_3537_simple_sequence_repeat_marker,_mRNA_sequence
Gorai.008G155400-JGI_221_v2.1	5.87322	5.09294	1	Gorai.008G155400	gi|150416582|gb|EF470298.1|_Gossypium_hirsutum_fasciclin-like_arabinogalactan_protein_1_mRNA,_complete_cds
Gorai.006G174600-JGI_221_v2.1	4.83977	4.68673	1	Gorai.006G174600	___NoMatchedTerm___
Gorai.006G150600-JGI_221_v2.1	5.50369	4.99833	1	Gorai.006G150600	gi|317174832|gb|HQ527051.1|_Gossypium_herbaceum_clone_NBRI_E2_1808_simple_sequence_repeat_marker,_mRNA_sequence
Gorai.005G190000-JGI_221_v2.1	5.66143	4.82567	1	Gorai.005G190000	gi|482679583|gb|KC160466.1|_Gossypium_raimondii_clone_Gr10014500_3-ketoacyl-CoA_synthase_5_(KCS5)_gene,_complete_cds
Gorai.005G118100-JGI_221_v2.1	4.22387	4.51298	1	Gorai.005G118100	gi|37529493|gb|AY345607.1|_Gossypium_hirsutum_beta-tubulin_5_mRNA,_complete_cds
Gorai.002G193500-JGI_221_v2.1	5.26441	4.30223	1	Gorai.002G193500	___NoMatchedTerm___
Gorai.013G261300-JGI_221_v2.1	4.03645	4.76873	1	Gorai.013G261300	gi|166343840|gb|EU376001.1|_Gossypium_hirsutum_beta-tubulin_17_mRNA,_complete_cds
Gorai.013G115500-JGI_221_v2.1	3.15109	5.73991	1	Gorai.013G115500	___NoMatchedTerm___
Gorai.013G112000-JGI_221_v2.1	5.11357	4.18252	1	Gorai.013G112000	___NoMatchedTerm___
Gorai.010G192400-JGI_221_v2.1	3.88199	5.96884	1	Gorai.010G192400	___NoMatchedTerm___
Gorai.009G198300-JGI_221_v2.1	5.42031	3.97065	1	Gorai.009G198300	___NoMatchedTerm___
Gorai.009G198100-JGI_221_v2.1	4.40073	4.3788	1	Gorai.009G198100	___NoMatchedTerm___
Gorai.009G102300-JGI_221_v2.1	5.12762	5.23666	1	Gorai.009G102300	gi|159895660|gb|EF688566.1|_Gossypium_hirsutum_3-ketoacyl-CoA_synthase_6_mRNA,_complete_cds
Gorai.009G073800-JGI_221_v2.1	5.69487	3.96465	1	Gorai.009G073800	gi|519683249|gb|JX577144.1|_Gossypium_hirsutum_clone_NBRI_GE8913_microsatellite_sequence
Gorai.008G245400-JGI_221_v2.1	4.82944	4.54167	1	Gorai.008G245400	gi|317175228|gb|HQ527447.1|_Gossypium_herbaceum_clone_NBRI_E_EYT27PB03GC9VR_simple_sequence_repeat_marker,_mRNA_sequence
Gorai.007G262200-JGI_221_v2.1	3.11357	5.77908	1	Gorai.007G262200	___NoMatchedTerm___
Gorai.007G027100-JGI_221_v2.1	5.30103	4.77581	1	Gorai.007G027100	gi|224552009|gb|FJ707309.1|_Gossypium_hirsutum_hybrid_proline-rich_protein_(HyPRP3)_mRNA,_complete_cds
Gorai.006G184700-JGI_221_v2.1	4.57136	4.94287	1	Gorai.006G184700	___NoMatchedTerm___
Gorai.006G106100-JGI_221_v2.1	4.90415	4.19985	1	Gorai.006G106100	gi|519685729|gb|JX579624.1|_Gossypium_hirsutum_clone_NBRI_GE11899_microsatellite_sequence
Gorai.005G129500-JGI_221_v2.1	4.66918	5.55757	1	Gorai.005G129500	gi|519683443|gb|JX577338.1|_Gossypium_hirsutum_clone_NBRI_GE9139_microsatellite_sequence
Gorai.004G118800-JGI_221_v2.1	5.20915	5.06896	1	Gorai.004G118800	gi|519747079|gb|JX614843.1|_Gossypium_hirsutum_clone_NBRI_GE58516_microsatellite_sequence
Gorai.004G069900-JGI_221_v2.1	2.59429	6.7116	1	Gorai.004G069900	gi|319433440|gb|GU451701.1|_Gossypium_hirsutum_copper_binding_protein_3_(BCP3)_mRNA,_complete_cds
Gorai.002G257900-JGI_221_v2.1	4.06739	5.32193	1	Gorai.002G257900	gi|32186895|gb|AY305727.1|_Gossypium_hirsutum_actin_(ACT5)_mRNA,_complete_cds
Gorai.002G177600-JGI_221_v2.1	4.46069	4.47751	1	Gorai.002G177600	gi|354620272|gb|JF261110.1|_Gossypium_barbadense_MLP-like_protein_mRNA,_complete_cds
Gorai.013G202800-JGI_221_v2.1	6.85744	3.46835	1	Gorai.013G202800	___NoMatchedTerm___
Gorai.013G167500-JGI_221_v2.1	7.56149	3.96157	1	Gorai.013G167500	___NoMatchedTerm___
Gorai.013G129100-JGI_221_v2.1	4.59617	4.85264	1	Gorai.013G129100	gi|519755016|gb|JX618769.1|_Gossypium_hirsutum_clone_NBRI_GE64389_microsatellite_sequence
Gorai.013G109100-JGI_221_v2.1	3.2636	6.34344	1	Gorai.013G109100	gi|519690844|gb|JX584739.1|_Gossypium_hirsutum_clone_NBRI_GE18122_microsatellite_sequence
Gorai.012G081600-JGI_221_v2.1	6.53846	3.56926	1	Gorai.012G081600	gi|519692310|gb|JX586205.1|_Gossypium_hirsutum_clone_NBRI_GE19969_microsatellite_sequence
Gorai.012G061700-JGI_221_v2.1	4.8226	4.79165	1	Gorai.012G061700	___NoMatchedTerm___
Gorai.012G049300-JGI_221_v2.1	4.50871	4.91718	1	Gorai.012G049300	___NoMatchedTerm___
Gorai.011G278700-JGI_221_v2.1	4.54824	4.80795	1	Gorai.011G278700	gi|519702477|gb|JX596257.1|_Gossypium_hirsutum_clone_NBRI_GE32797_microsatellite_sequence
Gorai.011G190000-JGI_221_v2.1	4.87017	4.27473	1	Gorai.011G190000	___NoMatchedTerm___
Gorai.011G140600-JGI_221_v2.1	5.40918	4.79261	1	Gorai.011G140600	___NoMatchedTerm___
Gorai.011G140500-JGI_221_v2.1	3.67864	6.76267	1	Gorai.011G140500	___NoMatchedTerm___
Gorai.011G135200-JGI_221_v2.1	5.4936	4.53777	1	Gorai.011G135200	gi|6983689|emb|AJ132636.1|_Gossypium_hirsutum_sad1_gene,_exons_1-3
Gorai.011G031400-JGI_221_v2.1	5.21837	4.14984	1	Gorai.011G031400	gi|1087110|gb|S79308.1|_Rac13=21.8_kda_GTP-binding_protein_[Gossypium_hirsutum=cotton_plants,_cv._Acala_SJ-2,_boll_fibers,_mRNA_Partial,_913_nt]
Gorai.010G223600-JGI_221_v2.1	3.12832	5.5896	1	Gorai.010G223600	gi|519693026|gb|JX586921.1|_Gossypium_hirsutum_clone_NBRI_GE20867_microsatellite_sequence
Gorai.010G182000-JGI_221_v2.1	2.92375	5.68801	1	Gorai.010G182000	___NoMatchedTerm___
Gorai.010G026100-JGI_221_v2.1	5.76924	4.22096	1	Gorai.010G026100	gi|410109642|gb|JX648310.1|_Gossypium_hirsutum_LIM_domain_protein_LIM-2_mRNA,_complete_cds
Gorai.009G391700-JGI_221_v2.1	5.17168	4.26295	1	Gorai.009G391700	___NoMatchedTerm___
Gorai.009G359100-JGI_221_v2.1	5.09367	4.88296	1	Gorai.009G359100	gi|519697015|gb|JX590910.1|_Gossypium_hirsutum_clone_NBRI_GE25924_microsatellite_sequence
Gorai.009G358800-JGI_221_v2.1	3.83064	5.82407	1	Gorai.009G358800	gi|519697015|gb|JX590910.1|_Gossypium_hirsutum_clone_NBRI_GE25924_microsatellite_sequence
Gorai.009G189900-JGI_221_v2.1	5.74393	4.50214	1	Gorai.009G189900	gi|256537723|gb|GQ394778.1|_Gossypium_hirsutum_cultivar_Deltapine_90_clone_MONCS1801_SSR_marker_DC40389_genomic_sequence
Gorai.009G188400-JGI_221_v2.1	3.61624	4.83206	1	Gorai.009G188400	gi|519685735|gb|JX579630.1|_Gossypium_hirsutum_clone_NBRI_GE11905_microsatellite_sequence
Gorai.009G178000-JGI_221_v2.1	2.81683	6.93955	1	Gorai.009G178000	gi|519686067|gb|JX579962.1|_Gossypium_hirsutum_clone_NBRI_GE12302_microsatellite_sequence
Gorai.009G138100-JGI_221_v2.1	4.35001	4.27473	1	Gorai.009G138100	___NoMatchedTerm___
Gorai.008G268900-JGI_221_v2.1	6.91842	5.68536	1	Gorai.008G268900	gi|317174100|gb|HQ526319.1|_Gossypium_herbaceum_clone_NBRI_D2_1113_simple_sequence_repeat_marker,_mRNA_sequence
Gorai.008G181600-JGI_221_v2.1	4.22254	5.18771	1	Gorai.008G181600	gi|119657088|gb|DQ912941.1|_Gossypium_barbadense_BHLH_mRNA,_partial_cds
Gorai.008G129800-JGI_221_v2.1	4.27071	4.65627	1	Gorai.008G129800	gi|482679569|gb|KC160459.1|_Gossypium_raimondii_clone_Gr10015926_3-ketoacyl-CoA_synthase_10_(KCS10)_gene,_complete_cds
Gorai.008G109700-JGI_221_v2.1	5.29879	4.45323	1	Gorai.008G109700	gi|317172855|gb|HQ525074.1|_Gossypium_herbaceum_clone_NBRI_A2_5425_simple_sequence_repeat_marker,_mRNA_sequence
Gorai.007G221700-JGI_221_v2.1	4.72249	4.75512	1	Gorai.007G221700	gi|519686853|gb|JX580748.1|_Gossypium_hirsutum_clone_NBRI_GE13243_microsatellite_sequence
Gorai.007G221600-JGI_221_v2.1	6.3416	4.92617	1	Gorai.007G221600	___NoMatchedTerm___
Gorai.007G109400-JGI_221_v2.1	6.56149	3.70378	1	Gorai.007G109400	___NoMatchedTerm___
Gorai.006G246000-JGI_221_v2.1	3.79411	4.63417	1	Gorai.006G246000	gi|332167936|gb|HQ452486.1|_Gossypium_hirsutum_auxin-responsive_protein_(Aux6)_mRNA,_complete_cds
Gorai.006G222500-JGI_221_v2.1	3.67864	4.72453	1	Gorai.006G222500	___NoMatchedTerm___
Gorai.006G193900-JGI_221_v2.1	3.44731	5.04646	1	Gorai.006G193900	___NoMatchedTerm___
Gorai.006G168500-JGI_221_v2.1	4.25765	5.2118	1	Gorai.006G168500	gi|33771691|gb|AY346330.1|_Gossypium_hirsutum_glycuronosyltransferase-like_protein_mRNA,_complete_cds
Gorai.006G110300-JGI_221_v2.1	5.11357	5.62684	1	Gorai.006G110300	___NoMatchedTerm___
Gorai.006G022000-JGI_221_v2.1	3.78173	5.03958	1	Gorai.006G022000	gi|519746136|gb|JX614469.1|_Gossypium_hirsutum_clone_NBRI_GE57867_microsatellite_sequence
Gorai.005G203900-JGI_221_v2.1	4.52861	4.58014	1	Gorai.005G203900	___NoMatchedTerm___
Gorai.005G109200-JGI_221_v2.1	6.50996	4.74161	1	Gorai.005G109200	gi|519683763|gb|JX577658.1|_Gossypium_hirsutum_clone_NBRI_GE9522_microsatellite_sequence
Gorai.005G060200-JGI_221_v2.1	3.37378	5.18771	1	Gorai.005G060200	___NoMatchedTerm___
Gorai.004G193700-JGI_221_v2.1	4.12015	4.51213	1	Gorai.004G193700	___NoMatchedTerm___
Gorai.004G176200-JGI_221_v2.1	7.88953	3.83604	1	Gorai.004G176200	gi|519688648|gb|JX582543.1|_Gossypium_hirsutum_clone_NBRI_GE15388_microsatellite_sequence
Gorai.004G169200-JGI_221_v2.1	7.78388	3.47177	1	Gorai.004G169200	gi|519751672|gb|JX617125.1|_Gossypium_hirsutum_clone_NBRI_GE62147_microsatellite_sequence
Gorai.003G141200-JGI_221_v2.1	5.23663	4.94271	1	Gorai.003G141200	___NoMatchedTerm___
Gorai.003G098900-JGI_221_v2.1	3.67864	5.23006	1	Gorai.003G098900	gi|519699485|gb|JX593380.1|_Gossypium_hirsutum_clone_NBRI_GE29056_microsatellite_sequence
Gorai.003G089100-JGI_221_v2.1	7.80541	4.00464	1	Gorai.003G089100	gi|445069053|gb|KC147719.1|_Gossypium_hirsutum_GA-stimulated_transcript-like_protein_5_(GASL5)_mRNA,_complete_cds
Gorai.003G008600-JGI_221_v2.1	6.04269	3.91718	1	Gorai.003G008600	gi|519683727|gb|JX577622.1|_Gossypium_hirsutum_clone_NBRI_GE9480_microsatellite_sequence
Gorai.001G123700-JGI_221_v2.1	3.33653	5.10982	1	Gorai.001G123700	___NoMatchedTerm___
Gorai.001G122600-JGI_221_v2.1	4.05303	4.67207	1	Gorai.001G122600	gi|317175503|gb|HQ527722.1|_Gossypium_herbaceum_clone_NBRI_E_2101_simple_sequence_repeat_marker,_mRNA_sequence
Gorai.001G081900-JGI_221_v2.1	6.02178	5.0871	1	Gorai.001G081900	___NoMatchedTerm___
Gorai.001G003400-JGI_221_v2.1	6.44731	4.65189	1	Gorai.001G003400	___NoMatchedTerm___
Gorai.N027400-JGI_221_v2.1	2.83064	5.89613	1	Gorai.N027400	gi|45758291|gb|AY438035.1|_Gossypium_hirsutum_beta-galactosidase_mRNA,_complete_cds
Gorai.013G215700-JGI_221_v2.1	5.37245	5.31116	1	Gorai.013G215700	gi|519686487|gb|JX580382.1|_Gossypium_hirsutum_clone_NBRI_GE12794_microsatellite_sequence
Gorai.013G184800-JGI_221_v2.1	3.35001	5.97413	1	Gorai.013G184800	___NoMatchedTerm___
Gorai.013G055600-JGI_221_v2.1	6.40102	4.82407	1	Gorai.013G055600	gi|519750617|gb|JX616678.1|_Gossypium_hirsutum_clone_NBRI_GE61517_microsatellite_sequence
Gorai.013G025500-JGI_221_v2.1	5.37245	4.53356	1	Gorai.013G025500	gi|519689131|gb|JX583026.1|_Gossypium_hirsutum_clone_NBRI_GE15977_microsatellite_sequence
Gorai.013G016700-JGI_221_v2.1	5.25216	4.7262	1	Gorai.013G016700	gi|529063270|gb|JX964084.1|_Gossypium_hirsutum_clone_NBRI_TRANS-353_microsatellite_sequence
Gorai.013G015300-JGI_221_v2.1	3.31356	5.24976	1	Gorai.013G015300	___NoMatchedTerm___
Gorai.013G010700-JGI_221_v2.1	2.87794	5.79982	1	Gorai.013G010700	___NoMatchedTerm___
Gorai.012G180900-JGI_221_v2.1	3.05303	6.08375	1	Gorai.012G180900	___NoMatchedTerm___
Gorai.012G162500-JGI_221_v2.1	4.89852	4.89613	1	Gorai.012G162500	___NoMatchedTerm___
Gorai.012G157800-JGI_221_v2.1	7.03238	3.91718	1	Gorai.012G157800	gi|519683316|gb|JX577211.1|_Gossypium_hirsutum_clone_NBRI_GE8986_microsatellite_sequence
Gorai.012G127500-JGI_221_v2.1	4.7286	4.50214	1	Gorai.012G127500	___NoMatchedTerm___
Gorai.012G112800-JGI_221_v2.1	3.87794	5.72453	1	Gorai.012G112800	gi|519687956|gb|JX581851.1|_Gossypium_hirsutum_clone_NBRI_GE14575_microsatellite_sequence
Gorai.012G080900-JGI_221_v2.1	3.5676	5.58418	1	Gorai.012G080900	___NoMatchedTerm___
Gorai.012G055200-JGI_221_v2.1	4.31356	5.63309	1	Gorai.012G055200	___NoMatchedTerm___
Gorai.012G035500-JGI_221_v2.1	4.42904	4.77516	1	Gorai.012G035500	gi|519747823|gb|JX615139.1|_Gossypium_hirsutum_clone_NBRI_GE58975_microsatellite_sequence
Gorai.012G021500-JGI_221_v2.1	3.53595	5.48109	1	Gorai.012G021500	gi|57282620|emb|AJ606074.1|_Gossypium_hirsutum_mRNA_for_cytochrome_P450-like_protein_(cyP450_gene),_strain_Xuzhou_142
Gorai.012G012800-JGI_221_v2.1	5.37245	4.42664	1	Gorai.012G012800	___NoMatchedTerm___
Gorai.012G009500-JGI_221_v2.1	5.7286	5.16511	1	Gorai.012G009500	gi|289186761|gb|EU921265.2|_Gossypium_hirsutum_cultivar_Xincai_5_flavonoid_3-glucosyltransferase_mRNA,_complete_cds
Gorai.011G164600-JGI_221_v2.1	3.89852	4.81367	1	Gorai.011G164600	gi|317172783|gb|HQ525002.1|_Gossypium_herbaceum_clone_NBRI_D_EYT27PB02EPKTW_simple_sequence_repeat_marker,_mRNA_sequence
Gorai.011G142300-JGI_221_v2.1	3.01121	5.63309	1	Gorai.011G142300	___NoMatchedTerm___
Gorai.011G105100-JGI_221_v2.1	5.48348	4.18563	1	Gorai.011G105100	gi|114795740|gb|DQ908473.1|_Gossypium_hirsutum_clone_LIB5327-001-A1-N1-D11_F_S_Gh534_microsatellite_sequence
Gorai.011G083300-JGI_221_v2.1	4.53595	4.23911	1	Gorai.011G083300	___NoMatchedTerm___
Gorai.011G027400-JGI_221_v2.1	4.42904	5.11852	1	Gorai.011G027400	gi|519747372|gb|JX614930.1|_Gossypium_hirsutum_clone_NBRI_GE58658_microsatellite_sequence
Gorai.010G240200-JGI_221_v2.1	3.05053	6.08375	1	Gorai.010G240200	___NoMatchedTerm___
Gorai.010G232400-JGI_221_v2.1	6.25216	3.79165	1	Gorai.010G232400	___NoMatchedTerm___
Gorai.010G211500-JGI_221_v2.1	4.81606	4.81367	1	Gorai.010G211500	___NoMatchedTerm___
Gorai.010G156700-JGI_221_v2.1	4.97652	4.89613	1	Gorai.010G156700	___NoMatchedTerm___
Gorai.010G147400-JGI_221_v2.1	5.37245	4.3095	1	Gorai.010G147400	gi|20377254|gb|AF351307.1|_Gossypium_hirsutum_clone_JESPR68_microsatellite_sequence
Gorai.010G045600-JGI_221_v2.1	5.77299	5.53356	1	Gorai.010G045600	___NoMatchedTerm___
Gorai.010G037500-JGI_221_v2.1	5.63549	4.04813	1	Gorai.010G037500	___NoMatchedTerm___
Gorai.010G013800-JGI_221_v2.1	3.78173	4.87138	1	Gorai.010G013800	___NoMatchedTerm___
Gorai.009G431300-JGI_221_v2.1	4.63549	4.18563	1	Gorai.009G431300	___NoMatchedTerm___
Gorai.009G390100-JGI_221_v2.1	6.58658	4.16511	1	Gorai.009G390100	___NoMatchedTerm___
Gorai.009G389900-JGI_221_v2.1	5.25216	4.04813	1	Gorai.009G389900	___NoMatchedTerm___
Gorai.009G306100-JGI_221_v2.1	3.67864	5.11852	1	Gorai.009G306100	___NoMatchedTerm___
Gorai.009G265200-JGI_221_v2.1	6.25216	3.7262	1	Gorai.009G265200	gi|519749920|gb|JX616326.1|_Gossypium_hirsutum_clone_NBRI_GE60897_microsatellite_sequence
Gorai.009G235700-JGI_221_v2.1	4.7286	4.18563	1	Gorai.009G235700	___NoMatchedTerm___
Gorai.009G233600-JGI_221_v2.1	4.78173	5.58418	1	Gorai.009G233600	gi|519685423|gb|JX579318.1|_Gossypium_hirsutum_clone_NBRI_GE11530_microsatellite_sequence
Gorai.009G226400-JGI_221_v2.1	4.05053	4.63309	1	Gorai.009G226400	___NoMatchedTerm___
Gorai.009G211600-JGI_221_v2.1	3.89852	5.24976	1	Gorai.009G211600	gi|519696473|gb|JX590368.1|_Gossypium_hirsutum_clone_NBRI_GE25267_microsatellite_sequence
Gorai.009G171400-JGI_221_v2.1	4.67864	5.44074	1	Gorai.009G171400	___NoMatchedTerm___
Gorai.009G139400-JGI_221_v2.1	3.89852	4.42664	1	Gorai.009G139400	gi|519725337|gb|JX609486.1|_Gossypium_hirsutum_clone_NBRI_GE50752_microsatellite_sequence
Gorai.009G113900-JGI_221_v2.1	6.05053	4.81367	1	Gorai.009G113900	gi|519697292|gb|JX591187.1|_Gossypium_hirsutum_clone_NBRI_GE26254_microsatellite_sequence
Gorai.009G081100-JGI_221_v2.1	4.01121	5.58418	1	Gorai.009G081100	___NoMatchedTerm___
Gorai.009G037000-JGI_221_v2.1	4.01121	5.50214	1	Gorai.009G037000	gi|529071334|gb|JX964641.1|_Gossypium_hirsutum_clone_NBRI_TRANS-910_microsatellite_sequence
Gorai.009G016500-JGI_221_v2.1	3.7286	4.63309	1	Gorai.009G016500	___NoMatchedTerm___
Gorai.008G280500-JGI_221_v2.1	6.08615	4.31116	1	Gorai.008G280500	gi|519689736|gb|JX583631.1|_Gossypium_hirsutum_clone_NBRI_GE16723_microsatellite_sequence
Gorai.008G211600-JGI_221_v2.1	5.25216	5.18563	1	Gorai.008G211600	___NoMatchedTerm___
Gorai.008G197100-JGI_221_v2.1	4.63549	4.61762	1	Gorai.008G197100	___NoMatchedTerm___
Gorai.008G166600-JGI_221_v2.1	3.26952	6.31116	1	Gorai.008G166600	___NoMatchedTerm___
Gorai.008G163700-JGI_221_v2.1	5.05053	4.18563	1	Gorai.008G163700	___NoMatchedTerm___
Gorai.008G109900-JGI_221_v2.1	5.42904	4.97413	1	Gorai.008G109900	gi|519739137|gb|JX611890.1|_Gossypium_hirsutum_clone_NBRI_GE54190_microsatellite_sequence
Gorai.008G107700-JGI_221_v2.1	4.75664	5.58418	1	Gorai.008G107700	gi|519687582|gb|JX581477.1|_Gossypium_hirsutum_clone_NBRI_GE14121_microsatellite_sequence
Gorai.008G077400-JGI_221_v2.1	5.12091	5.04813	1	Gorai.008G077400	___NoMatchedTerm___
Gorai.008G069700-JGI_221_v2.1	5.48348	4.04646	1	Gorai.008G069700	___NoMatchedTerm___
Gorai.007G363400-JGI_221_v2.1	3.19677	6.11852	1	Gorai.007G363400	___NoMatchedTerm___
Gorai.007G352900-JGI_221_v2.1	4.18803	5.04813	1	Gorai.007G352900	gi|519749798|gb|JX616259.1|_Gossypium_hirsutum_clone_NBRI_GE60771_microsatellite_sequence
Gorai.007G248300-JGI_221_v2.1	3.89852	4.7262	1	Gorai.007G248300	gi|519758896|gb|JX620766.1|_Gossypium_hirsutum_clone_NBRI_GE67089_microsatellite_sequence
Gorai.007G228100-JGI_221_v2.1	4.81606	5.37006	1	Gorai.007G228100	gi|308229781|gb|HM749060.1|_Gossypium_hirsutum_cultivar_Coker_312_xyloglucan_endotransglucosylase/hydrolase_(XTH3)_mRNA,_complete_cds
Gorai.007G219600-JGI_221_v2.1	5.53595	4.42664	1	Gorai.007G219600	gi|339449539|gb|HM236446.1|_Gossypium_hirsutum_MADS30_mRNA,_partial_cds
Gorai.007G218400-JGI_221_v2.1	5.63549	4.18563	1	Gorai.007G218400	___NoMatchedTerm___
Gorai.007G212500-JGI_221_v2.1	6.48348	5.7706	1	Gorai.007G212500	___NoMatchedTerm___
Gorai.007G206800-JGI_221_v2.1	3.2813	5.53189	1	Gorai.007G206800	___NoMatchedTerm___
Gorai.007G195900-JGI_221_v2.1	6.25216	3.91718	1	Gorai.007G195900	___NoMatchedTerm___
Gorai.007G055100-JGI_221_v2.1	3.44731	5.97413	1	Gorai.007G055100	___NoMatchedTerm___
Gorai.007G029700-JGI_221_v2.1	4.97652	4.18563	1	Gorai.007G029700	___NoMatchedTerm___
Gorai.007G013600-JGI_221_v2.1	4.38318	5.6804	1	Gorai.007G013600	gi|519751042|gb|JX616867.1|_Gossypium_hirsutum_clone_NBRI_GE61814_microsatellite_sequence
Gorai.007G009900-JGI_221_v2.1	2.68928	6.31116	1	Gorai.007G009900	gi|519683931|gb|JX577826.1|_Gossypium_hirsutum_clone_NBRI_GE9728_microsatellite_sequence
Gorai.007G008400-JGI_221_v2.1	5.93805	4.40903	1	Gorai.007G008400	___NoMatchedTerm___
Gorai.006G254400-JGI_221_v2.1	4.18803	5.42664	1	Gorai.006G254400	___NoMatchedTerm___
Gorai.006G240500-JGI_221_v2.1	4.89852	5.58418	1	Gorai.006G240500	___NoMatchedTerm___
Gorai.006G226700-JGI_221_v2.1	4.42904	4.31116	1	Gorai.006G226700	___NoMatchedTerm___
Gorai.006G220200-JGI_221_v2.1	4.81606	4.3095	1	Gorai.006G220200	___NoMatchedTerm___
Gorai.006G202500-JGI_221_v2.1	4.18803	4.97413	1	Gorai.006G202500	___NoMatchedTerm___
Gorai.006G202300-JGI_221_v2.1	4.53595	4.3095	1	Gorai.006G202300	___NoMatchedTerm___
Gorai.006G158800-JGI_221_v2.1	3.92375	5.58418	1	Gorai.006G158800	___NoMatchedTerm___
Gorai.006G083000-JGI_221_v2.1	2.31356	8.0116	1	Gorai.006G083000	gi|383932361|gb|JQ837709.1|_Gossypium_hirsutum_cultivar_ZM3_glycine_rich_protein_mRNA,_complete_cds
Gorai.005G267900-JGI_221_v2.1	3.44731	5.11852	1	Gorai.005G267900	___NoMatchedTerm___
Gorai.005G246100-JGI_221_v2.1	3.38318	5.18563	1	Gorai.005G246100	___NoMatchedTerm___
Gorai.005G228200-JGI_221_v2.1	4.97652	4.81367	1	Gorai.005G228200	___NoMatchedTerm___
Gorai.005G210200-JGI_221_v2.1	4.18803	4.42664	1	Gorai.005G210200	___NoMatchedTerm___
Gorai.005G202300-JGI_221_v2.1	4.63549	4.53356	1	Gorai.005G202300	___NoMatchedTerm___
Gorai.005G197700-JGI_221_v2.1	5.05303	5.67207	1	Gorai.005G197700	gi|519683074|gb|JX576969.1|_Gossypium_hirsutum_clone_NBRI_GE8700_microsatellite_sequence
Gorai.005G183300-JGI_221_v2.1	4.89852	4.87138	1	Gorai.005G183300	___NoMatchedTerm___
Gorai.005G152300-JGI_221_v2.1	3.90103	4.50214	1	Gorai.005G152300	___NoMatchedTerm___
Gorai.005G112700-JGI_221_v2.1	3.92375	4.50214	1	Gorai.005G112700	___NoMatchedTerm___
Gorai.005G060400-JGI_221_v2.1	3.42625	6.93566	1	Gorai.005G060400	gi|55956973|emb|AJ864707.1|_Gossypium_raimondii_partial_mRNA_for_alpha-1,6-xylosyltransferase_(x34.1_gene)
Gorai.004G286800-JGI_221_v2.1	5.18803	4.63309	1	Gorai.004G286800	gi|519747851|gb|JX615167.1|_Gossypium_hirsutum_clone_NBRI_GE59016_microsatellite_sequence
Gorai.004G209500-JGI_221_v2.1	5.53595	4.50214	1	Gorai.004G209500	___NoMatchedTerm___
Gorai.004G206800-JGI_221_v2.1	4.7286	5.81367	1	Gorai.004G206800	___NoMatchedTerm___
Gorai.004G194700-JGI_221_v2.1	5.85788	4.89613	1	Gorai.004G194700	gi|170674553|gb|EU532236.1|_Gossypium_barbadense_clone_I2-11_ISSR_marker_genomic_sequence
Gorai.004G185800-JGI_221_v2.1	5.25216	4.7262	1	Gorai.004G185800	gi|519749256|gb|JX615954.1|_Gossypium_hirsutum_clone_NBRI_GE60252_microsatellite_sequence
Gorai.004G161100-JGI_221_v2.1	4.18803	4.53356	1	Gorai.004G161100	gi|519747046|gb|JX614833.1|_Gossypium_hirsutum_clone_NBRI_GE58502_microsatellite_sequence
Gorai.004G142500-JGI_221_v2.1	5.12091	5.11852	1	Gorai.004G142500	___NoMatchedTerm___
Gorai.004G138200-JGI_221_v2.1	5.18803	4.04813	1	Gorai.004G138200	gi|519695211|gb|JX589106.1|_Gossypium_hirsutum_clone_NBRI_GE23731_microsatellite_sequence
Gorai.004G110400-JGI_221_v2.1	4.42904	4.53356	1	Gorai.004G110400	gi|519762895|gb|JX622555.1|_Gossypium_hirsutum_clone_NBRI_GE69334_microsatellite_sequence
Gorai.004G084000-JGI_221_v2.1	5.18803	4.42664	1	Gorai.004G084000	gi|519690744|gb|JX584639.1|_Gossypium_hirsutum_clone_NBRI_GE17994_microsatellite_sequence
Gorai.004G064000-JGI_221_v2.1	4.89852	5.24976	1	Gorai.004G064000	gi|519685413|gb|JX579308.1|_Gossypium_hirsutum_clone_NBRI_GE11517_microsatellite_sequence
Gorai.004G063800-JGI_221_v2.1	3.31356	5.24976	1	Gorai.004G063800	___NoMatchedTerm___
Gorai.004G026300-JGI_221_v2.1	5.31356	4.53356	1	Gorai.004G026300	___NoMatchedTerm___
Gorai.003G151900-JGI_221_v2.1	3.01121	5.97413	1	Gorai.003G151900	___NoMatchedTerm___
Gorai.003G120500-JGI_221_v2.1	6.08615	4.23911	1	Gorai.003G120500	___NoMatchedTerm___
Gorai.003G075900-JGI_221_v2.1	4.63549	4.89613	1	Gorai.003G075900	___NoMatchedTerm___
Gorai.003G067000-JGI_221_v2.1	3.31356	5.53356	1	Gorai.003G067000	___NoMatchedTerm___
Gorai.003G016100-JGI_221_v2.1	3.78173	4.89613	1	Gorai.003G016100	___NoMatchedTerm___
Gorai.002G254600-JGI_221_v2.1	4.50871	6.11852	1	Gorai.002G254600	___NoMatchedTerm___
Gorai.002G202500-JGI_221_v2.1	4.81606	4.44074	1	Gorai.002G202500	___NoMatchedTerm___
Gorai.002G159700-JGI_221_v2.1	5.63549	4.7262	1	Gorai.002G159700	___NoMatchedTerm___
Gorai.002G116600-JGI_221_v2.1	5.42904	4.18563	1	Gorai.002G116600	gi|519764893|gb|JX622949.1|_Gossypium_hirsutum_clone_NBRI_GE69913_microsatellite_sequence
Gorai.002G083900-JGI_221_v2.1	2.96814	5.7706	1	Gorai.002G083900	gi|529067108|gb|JX964289.1|_Gossypium_hirsutum_clone_NBRI_TRANS-558_microsatellite_sequence
Gorai.002G078000-JGI_221_v2.1	4.97652	4.97413	1	Gorai.002G078000	gi|312032583|gb|AC243151.1|_Gossypium_hirsutum_clone_MX094A13-jhn,_complete_sequence
Gorai.002G062200-JGI_221_v2.1	6.31356	4.04813	1	Gorai.002G062200	gi|317174511|gb|HQ526730.1|_Gossypium_herbaceum_clone_NBRI_A2_5487_simple_sequence_repeat_marker,_mRNA_sequence
Gorai.002G050500-JGI_221_v2.1	4.18803	4.63309	1	Gorai.002G050500	gi|519764986|gb|JX622985.1|_Gossypium_hirsutum_clone_NBRI_GE69961_microsatellite_sequence
Gorai.002G039400-JGI_221_v2.1	4.05053	5.18563	1	Gorai.002G039400	___NoMatchedTerm___
Gorai.002G024300-JGI_221_v2.1	4.31356	4.53356	1	Gorai.002G024300	___NoMatchedTerm___
Gorai.002G017400-JGI_221_v2.1	4.89852	4.3095	1	Gorai.002G017400	___NoMatchedTerm___
Gorai.002G008300-JGI_221_v2.1	4.18803	4.81367	1	Gorai.002G008300	___NoMatchedTerm___
Gorai.001G263600-JGI_221_v2.1	4.31356	4.31116	1	Gorai.001G263600	gi|519748338|gb|JX615468.1|_Gossypium_hirsutum_clone_NBRI_GE59465_microsatellite_sequence
Gorai.001G221500-JGI_221_v2.1	5.68279	4.93955	1	Gorai.001G221500	___NoMatchedTerm___
Gorai.001G217300-JGI_221_v2.1	4.42904	4.89613	1	Gorai.001G217300	gi|519693829|gb|JX587724.1|_Gossypium_hirsutum_clone_NBRI_GE21919_microsatellite_sequence
Gorai.001G215300-JGI_221_v2.1	5.42904	4.53356	1	Gorai.001G215300	gi|256537375|gb|GQ394430.1|_Gossypium_hirsutum_cultivar_Deltapine_388_clone_MONCS2271_SSR_marker_DPL0920_genomic_sequence
Gorai.001G209500-JGI_221_v2.1	3.44731	6.31116	1	Gorai.001G209500	gi|519692530|gb|JX586425.1|_Gossypium_hirsutum_clone_NBRI_GE20248_microsatellite_sequence
Gorai.001G123500-JGI_221_v2.1	5.12091	4.72453	1	Gorai.001G123500	___NoMatchedTerm___
Gorai.001G097500-JGI_221_v2.1	3.62419	5.3095	1	Gorai.001G097500	___NoMatchedTerm___
Gorai.001G013600-JGI_221_v2.1	3.67864	6.15247	1	Gorai.001G013600	gi|356690045|gb|HQ828075.1|_Gossypium_hirsutum_MAPKK1_mRNA,_complete_cds
Gorai.012G176200-JGI_221_v2.1	5.3878	6.49054	1	Gorai.012G176200	gi|38456074|gb|AY464062.1|_Gossypium_hirsutum_clone_ON033M19_mRNA_sequence
Gorai.009G138200-JGI_221_v2.1	7.19515	4.81615	1	Gorai.009G138200	___NoMatchedTerm___
Gorai.008G216800-JGI_221_v2.1	6.39104	4.5411	1	Gorai.008G216800	gi|229597363|gb|FJ915120.1|_Gossypium_hirsutum_vacuolar_invertase_mRNA,_complete_cds
Gorai.005G049400-JGI_221_v2.1	5.26441	6.26024	1	Gorai.005G049400	gi|14582307|gb|AF277673.1|_Gossypium_hirsutum_proline-rich_protein-1_(prp1)_gene,_complete_cds
Gorai.002G127000-JGI_221_v2.1	5.56182	5.39844	1	Gorai.002G127000	gi|124488475|gb|EF217320.1|_Gossypium_hirsutum_phenylcoumaran_benzylic_ether_reductase-like_protein_mRNA,_complete_cds
Gorai.001G180400-JGI_221_v2.1	4.9937	5.26374	1	Gorai.001G180400	___NoMatchedTerm___
Gorai.013G210800-JGI_221_v2.1	6.72895	6.49461	1	Gorai.013G210800	gi|317175793|gb|HQ528012.1|_Gossypium_herbaceum_clone_NBRI_C_EYT27PB01B3TK0_simple_sequence_repeat_marker,_mRNA_sequence
Gorai.012G124700-JGI_221_v2.1	6.22601	5.67474	1	Gorai.012G124700	gi|35187463|gb|AY375342.1|_Gossypium_barbadense_fiber_protein_Fb31_mRNA,_partial_cds
Gorai.012G054200-JGI_221_v2.1	5.55019	5.23735	1	Gorai.012G054200	gi|445069053|gb|KC147719.1|_Gossypium_hirsutum_GA-stimulated_transcript-like_protein_5_(GASL5)_mRNA,_complete_cds
Gorai.011G030000-JGI_221_v2.1	5.9651	4.84901	1	Gorai.011G030000	gi|209361536|gb|FJ194966.1|_Gossypium_hirsutum_E6-1_protein_kinase_(E6-1)_mRNA,_complete_cds
Gorai.010G127100-JGI_221_v2.1	5.21047	5.06427	1	Gorai.010G127100	gi|519686158|gb|JX580053.1|_Gossypium_hirsutum_clone_NBRI_GE12412_microsatellite_sequence
Gorai.010G082900-JGI_221_v2.1	4.79206	5.82557	1	Gorai.010G082900	gi|519692588|gb|JX586483.1|_Gossypium_hirsutum_clone_NBRI_GE20317_microsatellite_sequence
Gorai.009G429200-JGI_221_v2.1	5.77586	5.14241	1	Gorai.009G429200	gi|124488473|gb|EF217319.1|_Gossypium_hirsutum_clone_BR2_benzoquinone_reductase_mRNA,_complete_cds
Gorai.009G268100-JGI_221_v2.1	7.19171	5.06643	1	Gorai.009G268100	gi|519683362|gb|JX577257.1|_Gossypium_hirsutum_clone_NBRI_GE9044_microsatellite_sequence
Gorai.009G218500-JGI_221_v2.1	6.16041	8.53609	1	Gorai.009G218500	___NoMatchedTerm___
Gorai.009G141800-JGI_221_v2.1	6.25367	7.04646	1	Gorai.009G141800	___NoMatchedTerm___
Gorai.009G035800-JGI_221_v2.1	7.10769	7.54712	1	Gorai.009G035800	gi|217331644|gb|AY189968.2|_Gossypium_hirsutum_auxin_binding_protein_mRNA,_complete_cds
Gorai.009G006000-JGI_221_v2.1	5.39135	5.48626	1	Gorai.009G006000	gi|57282655|emb|AJ608936.1|_Gossypium_hirsutum_mRNA_for_putative_membrane_protein_(xl3_gene)
Gorai.008G169300-JGI_221_v2.1	6.61724	6.56378	1	Gorai.008G169300	gi|317173592|gb|HQ525811.1|_Gossypium_herbaceum_clone_NBRI_B_EYI1BW404JSNA9_simple_sequence_repeat_marker,_mRNA_sequence
Gorai.008G119400-JGI_221_v2.1	4.04651	7.58429	1	Gorai.008G119400	gi|256537718|gb|GQ394773.1|_Gossypium_hirsutum_cultivar_Deltapine_90_clone_MONCS1796_SSR_marker_DC40378_genomic_sequence
Gorai.007G068800-JGI_221_v2.1	7.98647	4.25334	1	Gorai.007G068800	___NoMatchedTerm___
Gorai.006G138900-JGI_221_v2.1	6.94722	8.10351	1	Gorai.006G138900	gi|25992548|gb|AF531374.1|_Gossypium_barbadense_fiber_protein_Fb10_mRNA,_partial_cds
Gorai.006G119900-JGI_221_v2.1	7.49471	8.86905	1	Gorai.006G119900	gi|30841337|gb|AY218846.1|_Gossypium_hirsutum_arabinogalactan_protein_mRNA,_complete_cds
Gorai.005G233500-JGI_221_v2.1	7.3878	7.333	1	Gorai.005G233500	gi|256010121|gb|FJ600363.1|_Gossypium_hirsutum_H6-like_protein_(H6L)_mRNA,_complete_cds
Gorai.005G174100-JGI_221_v2.1	5.52896	5.60073	1	Gorai.005G174100	___NoMatchedTerm___
Gorai.004G286900-JGI_221_v2.1	5.72384	6.04408	1	Gorai.004G286900	gi|529067170|gb|JX964299.1|_Gossypium_hirsutum_clone_NBRI_TRANS-568_microsatellite_sequence
Gorai.004G211800-JGI_221_v2.1	6.96031	7.9087	1	Gorai.004G211800	gi|23452314|gb|AF521240.1|_Gossypium_hirsutum_Xu-142_beta-tubulin_1_(BTub1)_mRNA,_complete_cds
Gorai.004G183000-JGI_221_v2.1	4.33071	6.25851	1	Gorai.004G183000	gi|529067156|gb|JX964297.1|_Gossypium_hirsutum_clone_NBRI_TRANS-566_microsatellite_sequence
Gorai.003G108300-JGI_221_v2.1	6.48217	5.63956	1	Gorai.003G108300	gi|68131791|gb|DQ073046.1|_Gossypium_hirsutum_pectate_lyase_mRNA,_complete_cds
Gorai.002G093000-JGI_221_v2.1	4.65414	5.63248	1	Gorai.002G093000	___NoMatchedTerm___
Gorai.002G079100-JGI_221_v2.1	5.5756	4.95409	1	Gorai.002G079100	gi|211906471|gb|FJ415183.1|_Gossypium_hirsutum_clone_Spot3-10w16_benzoquinone_reductase_mRNA,_complete_cds
Gorai.N010300-JGI_221_v2.1	8.21241	4.33672	1	Gorai.N010300	gi|74273313|gb|DQ123838.1|_Gossypium_hirsutum_VDRG6_(Vdrg6)_mRNA,_complete_cds
Gorai.013G270600-JGI_221_v2.1	6.34665	7.31592	1	Gorai.013G270600	gi|317174029|gb|HQ526248.1|_Gossypium_herbaceum_clone_NBRI_B2_437_simple_sequence_repeat_marker,_mRNA_sequence
Gorai.013G265400-JGI_221_v2.1	8.01915	11.6577	1	Gorai.013G265400	gi|150416574|gb|EF470294.1|_Gossypium_hirsutum_aquaporin_gamma-TIP_mRNA,_complete_cds
Gorai.013G188900-JGI_221_v2.1	6.85449	6.0257	1	Gorai.013G188900	gi|161610919|gb|EU273289.1|_Gossypium_hirsutum_lipase_mRNA,_complete_cds
Gorai.013G184700-JGI_221_v2.1	6.82461	5.35181	1	Gorai.013G184700	___NoMatchedTerm___
Gorai.013G172500-JGI_221_v2.1	4.27626	8.65527	1	Gorai.013G172500	gi|519685534|gb|JX579429.1|_Gossypium_hirsutum_clone_NBRI_GE11665_microsatellite_sequence
Gorai.013G097200-JGI_221_v2.1	6.54213	4.23911	1	Gorai.013G097200	___NoMatchedTerm___
Gorai.013G048900-JGI_221_v2.1	10.9246	6.72775	1	Gorai.013G048900	___NoMatchedTerm___
Gorai.013G026900-JGI_221_v2.1	5.19987	6.6451	1	Gorai.013G026900	___NoMatchedTerm___
Gorai.013G016200-JGI_221_v2.1	5.43154	5.636	1	Gorai.013G016200	gi|519687422|gb|JX581317.1|_Gossypium_hirsutum_clone_NBRI_GE13923_microsatellite_sequence
Gorai.012G153300-JGI_221_v2.1	4.49866	7.58418	1	Gorai.012G153300	gi|519685242|gb|JX579137.1|_Gossypium_hirsutum_clone_NBRI_GE11320_microsatellite_sequence
Gorai.012G145300-JGI_221_v2.1	4.77175	6.77827	1	Gorai.012G145300	___NoMatchedTerm___
Gorai.012G129600-JGI_221_v2.1	4.06943	8.4473	1	Gorai.012G129600	gi|74273311|gb|DQ123837.1|_Gossypium_hirsutum_epoxide_hydrolase_(GEPH)_mRNA,_complete_cds
Gorai.012G118400-JGI_221_v2.1	5.19053	5.43216	1	Gorai.012G118400	___NoMatchedTerm___
Gorai.012G077600-JGI_221_v2.1	4.17168	6.31378	1	Gorai.012G077600	___NoMatchedTerm___
Gorai.012G054900-JGI_221_v2.1	6.75096	4.37661	1	Gorai.012G054900	___NoMatchedTerm___
Gorai.012G037200-JGI_221_v2.1	8.37702	6.2697	1	Gorai.012G037200	gi|519765494|gb|JX623231.1|_Gossypium_hirsutum_clone_NBRI_GE70331_microsatellite_sequence
Gorai.012G021700-JGI_221_v2.1	6.21837	9.38084	1	Gorai.012G021700	gi|57282620|emb|AJ606074.1|_Gossypium_hirsutum_mRNA_for_cytochrome_P450-like_protein_(cyP450_gene),_strain_Xuzhou_142
Gorai.012G021600-JGI_221_v2.1	10.8054	10.1496	1	Gorai.012G021600	gi|57282620|emb|AJ606074.1|_Gossypium_hirsutum_mRNA_for_cytochrome_P450-like_protein_(cyP450_gene),_strain_Xuzhou_142
Gorai.012G006600-JGI_221_v2.1	9.76477	5.12663	1	Gorai.012G006600	___NoMatchedTerm___
Gorai.011G291000-JGI_221_v2.1	8.32851	6.2072	1	Gorai.011G291000	gi|519691271|gb|JX585166.1|_Gossypium_hirsutum_clone_NBRI_GE18661_microsatellite_sequence
Gorai.011G249200-JGI_221_v2.1	6.83064	5.49209	1	Gorai.011G249200	gi|482679605|gb|KC160477.1|_Gossypium_raimondii_clone_Gr10019659_3-ketoacyl-CoA_synthase_(KCS)_gene,_complete_cds
Gorai.011G165200-JGI_221_v2.1	6.47834	5.19847	1	Gorai.011G165200	gi|157673575|gb|EU001741.1|_Gossypium_hirsutum_beta-ketoacyl-CoA_synthase_(KCS2)_mRNA,_complete_cds
Gorai.011G098500-JGI_221_v2.1	4.79411	8.23308	1	Gorai.011G098500	___NoMatchedTerm___
Gorai.010G202700-JGI_221_v2.1	5.44731	5.50214	1	Gorai.010G202700	___NoMatchedTerm___
Gorai.010G187500-JGI_221_v2.1	4.08474	6.46407	1	Gorai.010G187500	gi|312032507|gb|AC243074.1|_Gossypium_arboreum_clone_GAH006G07-jlu,_complete_sequence
Gorai.010G185300-JGI_221_v2.1	6.76085	8.05161	1	Gorai.010G185300	gi|519765497|gb|JX623233.1|_Gossypium_hirsutum_clone_NBRI_GE70337_microsatellite_sequence
Gorai.010G178900-JGI_221_v2.1	7.42559	4.83728	1	Gorai.010G178900	gi|312032542|gb|AC243109.1|_Gossypium_raimondii_clone_GR__Ba0023N14-hoj,_complete_sequence
Gorai.010G177300-JGI_221_v2.1	3.74818	4.99857	1	Gorai.010G177300	gi|519696822|gb|JX590717.1|_Gossypium_hirsutum_clone_NBRI_GE25696_microsatellite_sequence
Gorai.010G152900-JGI_221_v2.1	5.46118	8.11685	1	Gorai.010G152900	___NoMatchedTerm___
Gorai.010G078700-JGI_221_v2.1	5.17168	6.69854	1	Gorai.010G078700	___NoMatchedTerm___
Gorai.010G069000-JGI_221_v2.1	4.84261	6.2835	1	Gorai.010G069000	gi|317174572|gb|HQ526791.1|_Gossypium_herbaceum_clone_NBRI_A2_1000_simple_sequence_repeat_marker,_mRNA_sequence
Gorai.010G057900-JGI_221_v2.1	7.70183	8.94232	1	Gorai.010G057900	___NoMatchedTerm___
Gorai.010G022200-JGI_221_v2.1	5.94612	8.37006	1	Gorai.010G022200	___NoMatchedTerm___
Gorai.009G428400-JGI_221_v2.1	6.01121	6.27912	1	Gorai.009G428400	gi|8389328|gb|AF270425.1|_Gossypium_hirsutum_(+)-delta-cadinene_synthase_(cdn1-C4)_mRNA,_partial_cds
Gorai.009G293500-JGI_221_v2.1	7.50996	4.26768	1	Gorai.009G293500	gi|81230694|gb|DQ204496.1|_Gossypium_hirsutum_alpha-expansin_2_mRNA,_complete_cds
Gorai.009G280600-JGI_221_v2.1	6.87794	4.48196	1	Gorai.009G280600	gi|519696646|gb|JX590541.1|_Gossypium_hirsutum_clone_NBRI_GE25469_microsatellite_sequence
Gorai.009G244900-JGI_221_v2.1	6.83064	7.44856	1	Gorai.009G244900	gi|153805697|gb|EF643508.1|_Gossypium_hirsutum_nodulin_family_protein_(NLP)_mRNA,_complete_cds
Gorai.009G240900-JGI_221_v2.1	8.05951	5.3095	1	Gorai.009G240900	gi|256537715|gb|GQ394770.1|_Gossypium_hirsutum_cultivar_Deltapine_90_clone_MONCS1793_SSR_marker_DC40373_genomic_sequence
Gorai.009G210300-JGI_221_v2.1	8.66523	4.39291	1	Gorai.009G210300	gi|62766605|gb|AY929163.1|_Gossypium_hirsutum_patatin-like_protein_(Pat1)_mRNA,_complete_cds
Gorai.009G184400-JGI_221_v2.1	5.38863	6.7937	1	Gorai.009G184400	gi|119888001|gb|EF095706.1|_Gossypium_hirsutum_proline-rich_protein_(PRP5)_mRNA,_complete_cds
Gorai.009G179700-JGI_221_v2.1	6.9181	6.81603	1	Gorai.009G179700	___NoMatchedTerm___
Gorai.009G107200-JGI_221_v2.1	8.36462	3.93319	1	Gorai.009G107200	gi|256568428|gb|FJ646599.1|_Gossypium_hirsutum_PIP_protein_(PIP2;8)_mRNA,_complete_cds
Gorai.009G104700-JGI_221_v2.1	5.62419	4.84001	1	Gorai.009G104700	gi|256537784|gb|GQ394839.1|_Gossypium_hirsutum_cultivar_Delta_Opal_clone_MONCS1862_SSR_marker_DPL0086_genomic_sequence
Gorai.009G090700-JGI_221_v2.1	9.53595	8.52062	1	Gorai.009G090700	___NoMatchedTerm___
Gorai.009G089500-JGI_221_v2.1	5.37221	8.16915	1	Gorai.009G089500	gi|519692828|gb|JX586723.1|_Gossypium_hirsutum_clone_NBRI_GE20620_microsatellite_sequence
Gorai.009G058900-JGI_221_v2.1	7.87834	8.28844	1	Gorai.009G058900	___NoMatchedTerm___
Gorai.009G033500-JGI_221_v2.1	5.87212	5.9351	1	Gorai.009G033500	gi|29836576|gb|AY124073.1|_Gossypium_raimondii_protein_kinase_GhCLK1_gene,_partial_cds
Gorai.009G028500-JGI_221_v2.1	5.36669	9.80288	1	Gorai.009G028500	gi|217331645|gb|AY189970.2|_Gossypium_hirsutum_profilin_mRNA,_complete_cds
Gorai.009G013100-JGI_221_v2.1	5.70511	7.7706	1	Gorai.009G013100	gi|317173716|gb|HQ525935.1|_Gossypium_herbaceum_clone_NBRI_A2_5191_simple_sequence_repeat_marker,_mRNA_sequence
Gorai.008G290600-JGI_221_v2.1	3.78173	8.78446	1	Gorai.008G290600	___NoMatchedTerm___
Gorai.008G281400-JGI_221_v2.1	6.45652	5.47177	1	Gorai.008G281400	___NoMatchedTerm___
Gorai.008G203900-JGI_221_v2.1	8.99923	6.6927	1	Gorai.008G203900	gi|68131791|gb|DQ073046.1|_Gossypium_hirsutum_pectate_lyase_mRNA,_complete_cds
Gorai.008G188600-JGI_221_v2.1	7.40102	6.76267	1	Gorai.008G188600	___NoMatchedTerm___
Gorai.008G101600-JGI_221_v2.1	6.71491	5.97848	1	Gorai.008G101600	___NoMatchedTerm___
Gorai.008G035300-JGI_221_v2.1	6.58908	7.73096	1	Gorai.008G035300	gi|89276300|gb|DQ402082.1|_Gossypium_hirsutum_actin_depolymerizing_factor_5_(ADF5)_mRNA,_complete_cds
Gorai.007G372700-JGI_221_v2.1	7.68364	7.40636	1	Gorai.007G372700	gi|300793601|tpg|BK007054.1|_TPA_inf:_Gossypium_hirsutum_aquaporin_TIP1;4_mRNA,_complete_cds
Gorai.007G235400-JGI_221_v2.1	3.422	5.3875	1	Gorai.007G235400	___NoMatchedTerm___
Gorai.007G234600-JGI_221_v2.1	4.50871	4.93955	1	Gorai.007G234600	gi|317174103|gb|HQ526322.1|_Gossypium_herbaceum_clone_NBRI_D2_800_simple_sequence_repeat_marker,_mRNA_sequence
Gorai.007G206100-JGI_221_v2.1	6.77237	4.17428	1	Gorai.007G206100	___NoMatchedTerm___
Gorai.007G186500-JGI_221_v2.1	6.39948	7.7937	1	Gorai.007G186500	___NoMatchedTerm___
Gorai.007G165800-JGI_221_v2.1	6.59617	8.16984	1	Gorai.007G165800	gi|29836526|gb|AY117091.1|_Gossypium_raimondii_putative_pollen_surface_protein_gene,_partial_cds
Gorai.007G158800-JGI_221_v2.1	4.85921	4.95427	1	Gorai.007G158800	___NoMatchedTerm___
Gorai.007G114700-JGI_221_v2.1	7.06845	4.47177	1	Gorai.007G114700	___NoMatchedTerm___
Gorai.007G057400-JGI_221_v2.1	8.81654	9.74134	1	Gorai.007G057400	gi|2244731|dbj|D88413.1|_Gossypium_hirsutum_mRNA_for_endo-xyloglucan_transferase,_clone_CF101,_partial_cds
Gorai.007G055900-JGI_221_v2.1	8.20433	5.37661	1	Gorai.007G055900	gi|519683400|gb|JX577295.1|_Gossypium_hirsutum_clone_NBRI_GE9087_microsatellite_sequence
Gorai.007G045500-JGI_221_v2.1	4.70511	6.47483	1	Gorai.007G045500	gi|317172850|gb|HQ525069.1|_Gossypium_herbaceum_clone_NBRI_A2_1113-1_simple_sequence_repeat_marker,_mRNA_sequence_x0001_gi|317175143|gb|HQ527362.1|_Gossypium_herbaceum_clone_NBRI_A2_1113-2_simple_sequence_repeat_marker,_mRNA_sequence
Gorai.006G255100-JGI_221_v2.1	3.80639	6.7262	1	Gorai.006G255100	___NoMatchedTerm___
Gorai.006G240600-JGI_221_v2.1	9.53917	7.82407	1	Gorai.006G240600	___NoMatchedTerm___
Gorai.006G174500-JGI_221_v2.1	8.37965	4.55578	1	Gorai.006G174500	___NoMatchedTerm___
Gorai.006G150100-JGI_221_v2.1	3.56037	6.37989	1	Gorai.006G150100	gi|519694664|gb|JX588559.1|_Gossypium_hirsutum_clone_NBRI_GE23027_microsatellite_sequence
Gorai.006G140800-JGI_221_v2.1	6.98984	9.05712	1	Gorai.006G140800	___NoMatchedTerm___
Gorai.006G135300-JGI_221_v2.1	8.4151	8.87086	1	Gorai.006G135300	gi|519695196|gb|JX589091.1|_Gossypium_hirsutum_clone_NBRI_GE23712_microsatellite_sequence
Gorai.006G100100-JGI_221_v2.1	6.20915	9.81896	1	Gorai.006G100100	___NoMatchedTerm___
Gorai.006G069800-JGI_221_v2.1	4.21325	5.59274	1	Gorai.006G069800	___NoMatchedTerm___
Gorai.006G068400-JGI_221_v2.1	8.93358	10.356	1	Gorai.006G068400	___NoMatchedTerm___
Gorai.006G037000-JGI_221_v2.1	7.44284	6.68536	1	Gorai.006G037000	gi|529068110|gb|JX964423.1|_Gossypium_hirsutum_clone_NBRI_TRANS-692_microsatellite_sequence
Gorai.005G265100-JGI_221_v2.1	5.7311	6.90586	1	Gorai.005G265100	___NoMatchedTerm___
Gorai.005G253800-JGI_221_v2.1	5.46291	5.9484	1	Gorai.005G253800	gi|89276300|gb|DQ402082.1|_Gossypium_hirsutum_actin_depolymerizing_factor_5_(ADF5)_mRNA,_complete_cds
Gorai.005G246600-JGI_221_v2.1	8.64149	4.50881	1	Gorai.005G246600	gi|529067075|gb|JX964284.1|_Gossypium_hirsutum_clone_NBRI_TRANS-553_microsatellite_sequence
Gorai.005G237600-JGI_221_v2.1	4.49866	6.67207	1	Gorai.005G237600	___NoMatchedTerm___
Gorai.005G230200-JGI_221_v2.1	8.81075	5.32317	1	Gorai.005G230200	gi|519746592|gb|JX614660.1|_Gossypium_hirsutum_clone_NBRI_GE58220_microsatellite_sequence
Gorai.005G224900-JGI_221_v2.1	9.09054	9.82407	1	Gorai.005G224900	gi|119887997|gb|EF095704.1|_Gossypium_hirsutum_proline-rich_protein_(PRP3)_mRNA,_complete_cds
Gorai.005G197500-JGI_221_v2.1	3.64257	6.89446	1	Gorai.005G197500	gi|312032561|gb|AC243128.1|_Gossypium_raimondii_clone_GR__Ba0229A16-hoh,_complete_sequence
Gorai.005G160800-JGI_221_v2.1	9.02781	6.71808	1	Gorai.005G160800	gi|74273313|gb|DQ123838.1|_Gossypium_hirsutum_VDRG6_(Vdrg6)_mRNA,_complete_cds
Gorai.005G090000-JGI_221_v2.1	8.86302	6.9312	1	Gorai.005G090000	___NoMatchedTerm___
Gorai.005G051700-JGI_221_v2.1	9.62644	7.76058	1	Gorai.005G051700	___NoMatchedTerm___
Gorai.005G022500-JGI_221_v2.1	6.69634	7.80694	1	Gorai.005G022500	gi|153805693|gb|EF643506.1|_Gossypium_hirsutum_cysteine_proteinase_inhibitor_(CPI)_mRNA,_complete_cds
Gorai.005G022400-JGI_221_v2.1	5.55019	4.94559	1	Gorai.005G022400	___NoMatchedTerm___
Gorai.005G021000-JGI_221_v2.1	4.90864	5.31806	1	Gorai.005G021000	gi|317172887|gb|HQ525106.1|_Gossypium_herbaceum_clone_NBRI_A2_5545_simple_sequence_repeat_marker,_mRNA_sequence
Gorai.004G288200-JGI_221_v2.1	7.06845	3.46738	1	Gorai.004G288200	gi|39651942|emb|AJ567032.1|_Gossypium_hirsutum_microsatellite_DNA_mGhCIR083,_clone_CIR083
Gorai.004G138600-JGI_221_v2.1	5.48599	5.51213	1	Gorai.004G138600	gi|519696042|gb|JX589937.1|_Gossypium_hirsutum_clone_NBRI_GE24736_microsatellite_sequence
Gorai.004G020900-JGI_221_v2.1	5.10366	6.44633	1	Gorai.004G020900	gi|4877644|gb|AF114253.1|AF114253_Gossypium_hirsutum_pFS18_mRNA,_complete_cds
Gorai.004G007200-JGI_221_v2.1	5.48853	8.59039	1	Gorai.004G007200	gi|519765524|gb|JX623246.1|_Gossypium_hirsutum_clone_NBRI_GE70357_microsatellite_sequence
Gorai.003G177400-JGI_221_v2.1	4.31607	5.13957	1	Gorai.003G177400	gi|317174251|gb|HQ526470.1|_Gossypium_herbaceum_clone_NBRI_E_EYT27PB03GTB56_simple_sequence_repeat_marker,_mRNA_sequence
Gorai.003G165800-JGI_221_v2.1	4.73753	9.18973	1	Gorai.003G165800	gi|14334056|gb|AF332974.1|AF332974_Gossypium_arboreum_P450_monooxygenase_mRNA,_complete_cds
Gorai.003G147100-JGI_221_v2.1	8.5678	7.97788	1	Gorai.003G147100	___NoMatchedTerm___
Gorai.003G085000-JGI_221_v2.1	4.70219	6.43625	1	Gorai.003G085000	___NoMatchedTerm___
Gorai.003G061200-JGI_221_v2.1	4.96814	8.26536	1	Gorai.003G061200	___NoMatchedTerm___
Gorai.003G009900-JGI_221_v2.1	6.54986	9.27638	1	Gorai.003G009900	___NoMatchedTerm___
Gorai.003G007600-JGI_221_v2.1	7.76202	8.25257	1	Gorai.003G007600	___NoMatchedTerm___
Gorai.002G249500-JGI_221_v2.1	6.31607	7.56823	1	Gorai.002G249500	___NoMatchedTerm___
Gorai.002G248400-JGI_221_v2.1	4.92375	5.51213	1	Gorai.002G248400	gi|164668307|gb|EF079901.2|_Gossypium_hirsutum_PIP2_protein_(PIP2;1)_mRNA,_partial_cds
Gorai.002G242100-JGI_221_v2.1	5.79411	5.58214	1	Gorai.002G242100	___NoMatchedTerm___
Gorai.002G228000-JGI_221_v2.1	6.5531	7.32374	1	Gorai.002G228000	gi|519749567|gb|JX616133.1|_Gossypium_hirsutum_clone_NBRI_GE60557_microsatellite_sequence
Gorai.002G219600-JGI_221_v2.1	9.42904	6.00464	1	Gorai.002G219600	gi|312032554|gb|AC243121.1|_Gossypium_raimondii_clone_GR__Ba0142D21-hnv,_complete_sequence
Gorai.002G199100-JGI_221_v2.1	8.17981	8.27912	1	Gorai.002G199100	gi|221185998|gb|FJ590955.1|_Gossypium_hirsutum_blue_copper-like_protein_(BCP3)_mRNA,_complete_cds
Gorai.002G197200-JGI_221_v2.1	3.22143	6.12663	1	Gorai.002G197200	gi|45758291|gb|AY438035.1|_Gossypium_hirsutum_beta-galactosidase_mRNA,_complete_cds
Gorai.002G191900-JGI_221_v2.1	5.50871	4.99043	1	Gorai.002G191900	gi|519687377|gb|JX581272.1|_Gossypium_hirsutum_clone_NBRI_GE13868_microsatellite_sequence
Gorai.002G144400-JGI_221_v2.1	7.68862	5.98757	1	Gorai.002G144400	gi|459354679|gb|KC246033.1|_Gossypium_arboreum_clone_GaSIM-1_cyclin-dependent_protein_kinase_inhibitor_Siamese_mRNA,_complete_cds
Gorai.002G125000-JGI_221_v2.1	7.0633	7.05394	1	Gorai.002G125000	___NoMatchedTerm___
Gorai.002G096100-JGI_221_v2.1	6.52737	6.49838	1	Gorai.002G096100	gi|30844108|gb|AY207316.1|_Gossypium_hirsutum_MAP_kinase-like_protein_mRNA,_complete_cds
Gorai.002G073300-JGI_221_v2.1	6.98444	5.31806	1	Gorai.002G073300	gi|38016520|gb|AY429438.1|_Gossypium_barbadense_fiber_protein_Fb34_mRNA,_complete_cds
Gorai.002G016500-JGI_221_v2.1	4.6697	5.8636	1	Gorai.002G016500	___NoMatchedTerm___
Gorai.002G001100-JGI_221_v2.1	9.77784	7.97667	1	Gorai.002G001100	gi|482679595|gb|KC160472.1|_Gossypium_raimondii_clone_Gr10018194_3-ketoacyl-CoA_synthase_12_(KCS12)_gene,_complete_cds
Gorai.001G220300-JGI_221_v2.1	4.20915	5.85969	1	Gorai.001G220300	___NoMatchedTerm___
Gorai.001G188400-JGI_221_v2.1	6.46601	6.94271	1	Gorai.001G188400	___NoMatchedTerm___
Gorai.001G118000-JGI_221_v2.1	7.13807	7.96461	1	Gorai.001G118000	gi|519716149|gb|JX605613.1|_Gossypium_hirsutum_clone_NBRI_GE45338_microsatellite_sequence
Gorai.001G067100-JGI_221_v2.1	8.47679	5.05559	1	Gorai.001G067100	gi|519692334|gb|JX586229.1|_Gossypium_hirsutum_clone_NBRI_GE20001_microsatellite_sequence
Gorai.001G064500-JGI_221_v2.1	8.5295	8.00464	1	Gorai.001G064500	___NoMatchedTerm___
Gorai.001G042200-JGI_221_v2.1	5.39135	4.65865	1	Gorai.001G042200	___NoMatchedTerm___
Gorai.001G040400-JGI_221_v2.1	3.93498	7.71489	1	Gorai.001G040400	___NoMatchedTerm___
Gorai.001G009800-JGI_221_v2.1	5.6853	5.1964	1	Gorai.001G009800	___NoMatchedTerm___
Gorai.N013700-JGI_221_v2.1	4.7286	5.42664	1	Gorai.N013700	gi|519694002|gb|JX587897.1|_Gossypium_hirsutum_clone_NBRI_GE22162_microsatellite_sequence
Gorai.N011800-JGI_221_v2.1	4.53846	6.55909	1	Gorai.N011800	gi|519693890|gb|JX587785.1|_Gossypium_hirsutum_clone_NBRI_GE22005_microsatellite_sequence
Gorai.013G253800-JGI_221_v2.1	8.05951	6.21806	1	Gorai.013G253800	___NoMatchedTerm___
Gorai.013G242100-JGI_221_v2.1	5.97652	4.97413	1	Gorai.013G242100	___NoMatchedTerm___
Gorai.013G231800-JGI_221_v2.1	6.89852	5.23911	1	Gorai.013G231800	gi|519683622|gb|JX577517.1|_Gossypium_hirsutum_clone_NBRI_GE9359_microsatellite_sequence
Gorai.013G211900-JGI_221_v2.1	7.13799	5.37006	1	Gorai.013G211900	___NoMatchedTerm___
Gorai.013G194500-JGI_221_v2.1	6.12091	6.79229	1	Gorai.013G194500	___NoMatchedTerm___
Gorai.013G175200-JGI_221_v2.1	5.44731	5.75007	1	Gorai.013G175200	___NoMatchedTerm___
Gorai.013G150600-JGI_221_v2.1	5.18803	4.61762	1	Gorai.013G150600	gi|519684930|gb|JX578825.1|_Gossypium_hirsutum_clone_NBRI_GE10931_microsatellite_sequence
Gorai.013G141100-JGI_221_v2.1	7.62341	5.42497	1	Gorai.013G141100	gi|529072845|gb|JX964704.1|_Gossypium_hirsutum_clone_NBRI_TRANS-973_microsatellite_sequence
Gorai.013G113300-JGI_221_v2.1	6.014	4.97413	1	Gorai.013G113300	gi|519707717|gb|JX601175.1|_Gossypium_hirsutum_clone_NBRI_GE39278_microsatellite_sequence
Gorai.013G066100-JGI_221_v2.1	4.97652	5.11852	1	Gorai.013G066100	___NoMatchedTerm___
Gorai.013G066000-JGI_221_v2.1	4.89852	4.7262	1	Gorai.013G066000	___NoMatchedTerm___
Gorai.013G065800-JGI_221_v2.1	8.07733	7.234	1	Gorai.013G065800	___NoMatchedTerm___
Gorai.013G045100-JGI_221_v2.1	5.81606	6.08375	1	Gorai.013G045100	gi|519696458|gb|JX590353.1|_Gossypium_hirsutum_clone_NBRI_GE25251_microsatellite_sequence
Gorai.013G031300-JGI_221_v2.1	8.014	6.37006	1	Gorai.013G031300	___NoMatchedTerm___
Gorai.013G011400-JGI_221_v2.1	7.52301	5.93566	1	Gorai.013G011400	gi|519748076|gb|JX615332.1|_Gossypium_hirsutum_clone_NBRI_GE59260_microsatellite_sequence
Gorai.013G007000-JGI_221_v2.1	7.44284	4.96157	1	Gorai.013G007000	gi|317172545|gb|HQ524764.1|_Gossypium_herbaceum_clone_NBRI_A_9189_simple_sequence_repeat_marker,_mRNA_sequence
Gorai.012G181400-JGI_221_v2.1	3.92375	5.97413	1	Gorai.012G181400	___NoMatchedTerm___
Gorai.012G178800-JGI_221_v2.1	5.7286	5.89613	1	Gorai.012G178800	gi|519691820|gb|JX585715.1|_Gossypium_hirsutum_clone_NBRI_GE19365_microsatellite_sequence
Gorai.012G178700-JGI_221_v2.1	6.48348	4.0871	1	Gorai.012G178700	___NoMatchedTerm___
Gorai.012G149100-JGI_221_v2.1	5.50871	7.74857	1	Gorai.012G149100	gi|211906485|gb|FJ415190.1|_Gossypium_hirsutum_clone_Spotp5_phosphoglycerate_dehydrogenase_mRNA,_complete_cds
Gorai.012G122100-JGI_221_v2.1	5.97652	5.97413	1	Gorai.012G122100	___NoMatchedTerm___
Gorai.012G118000-JGI_221_v2.1	6.12091	6.24976	1	Gorai.012G118000	___NoMatchedTerm___
Gorai.012G113100-JGI_221_v2.1	6.61124	3.67207	1	Gorai.012G113100	___NoMatchedTerm___
Gorai.012G063200-JGI_221_v2.1	6.95742	4.31116	1	Gorai.012G063200	___NoMatchedTerm___
Gorai.012G027700-JGI_221_v2.1	5.81857	7.44045	1	Gorai.012G027700	gi|256536428|gb|GQ393483.1|_Gossypium_hirsutum_cultivar_Deltapine_33_B_clone_MONCS0448_SSR_marker_CGR5451_genomic_sequence
Gorai.012G019500-JGI_221_v2.1	4.7286	5.85549	1	Gorai.012G019500	___NoMatchedTerm___
Gorai.011G292000-JGI_221_v2.1	6.08615	3.91718	1	Gorai.011G292000	gi|317172616|gb|HQ524835.1|_Gossypium_herbaceum_clone_NBRI_B2_150_simple_sequence_repeat_marker,_mRNA_sequence
Gorai.011G272800-JGI_221_v2.1	5.31356	5.18563	1	Gorai.011G272800	___NoMatchedTerm___
Gorai.011G249100-JGI_221_v2.1	4.89852	6.37006	1	Gorai.011G249100	gi|482679607|gb|KC160478.1|_Gossypium_raimondii_clone_Gr10019657_3-ketoacyl-CoA_synthase_(KCS)_gene,_complete_cds
Gorai.011G212700-JGI_221_v2.1	6.08615	5.63309	1	Gorai.011G212700	gi|459649444|gb|KC316008.1|_Gossypium_barbadense_annexin_AnxGb5_mRNA,_complete_cds
Gorai.011G199100-JGI_221_v2.1	4.83064	5.96157	1	Gorai.011G199100	gi|519693255|gb|JX587150.1|_Gossypium_hirsutum_clone_NBRI_GE21162_microsatellite_sequence
Gorai.011G129900-JGI_221_v2.1	6.75096	6.83604	1	Gorai.011G129900	gi|211906537|gb|FJ415216.1|_Gossypium_hirsutum_clone_Ghpox5_class_III_peroxidase_(POX5)_mRNA,_complete_cds
Gorai.011G103900-JGI_221_v2.1	8.54238	5.50214	1	Gorai.011G103900	___NoMatchedTerm___
Gorai.011G092600-JGI_221_v2.1	5.12091	5.81367	1	Gorai.011G092600	gi|519748381|gb|JX615496.1|_Gossypium_hirsutum_clone_NBRI_GE59509_microsatellite_sequence
Gorai.011G082900-JGI_221_v2.1	5.05053	6.21806	1	Gorai.011G082900	gi|519766010|gb|JX623489.1|_Gossypium_hirsutum_clone_NBRI_GE70753_microsatellite_sequence
Gorai.011G082200-JGI_221_v2.1	7.35795	5.89613	1	Gorai.011G082200	___NoMatchedTerm___
Gorai.011G079000-JGI_221_v2.1	7.62341	5.56104	1	Gorai.011G079000	___NoMatchedTerm___
Gorai.011G066300-JGI_221_v2.1	4.75664	6.45634	1	Gorai.011G066300	___NoMatchedTerm___
Gorai.011G064900-JGI_221_v2.1	7.77299	4.37661	1	Gorai.011G064900	___NoMatchedTerm___
Gorai.011G049500-JGI_221_v2.1	5.77299	5.72453	1	Gorai.011G049500	gi|529061984|gb|JX963870.1|_Gossypium_hirsutum_clone_NBRI_TRANS-139_microsatellite_sequence
Gorai.011G042700-JGI_221_v2.1	5.89852	5.53356	1	Gorai.011G042700	gi|519694391|gb|JX588286.1|_Gossypium_hirsutum_clone_NBRI_GE22670_microsatellite_sequence
Gorai.010G246700-JGI_221_v2.1	7.92827	8.4127	1	Gorai.010G246700	___NoMatchedTerm___
Gorai.010G223200-JGI_221_v2.1	5.53595	6.97413	1	Gorai.010G223200	gi|519765686|gb|JX623334.1|_Gossypium_hirsutum_clone_NBRI_GE70502_microsatellite_sequence
Gorai.010G201500-JGI_221_v2.1	5.68279	6.37006	1	Gorai.010G201500	gi|317172056|gb|HQ524419.1|_Gossypium_herbaceum_clone_NBRI_F019_simple_sequence_repeat_marker,_genomic_sequence
Gorai.010G087500-JGI_221_v2.1	3.1332	6.42664	1	Gorai.010G087500	gi|519686157|gb|JX580052.1|_Gossypium_hirsutum_clone_NBRI_GE12410_microsatellite_sequence
Gorai.010G083400-JGI_221_v2.1	7.35795	5.04813	1	Gorai.010G083400	gi|223046126|gb|FJ644277.1|_Gossypium_hirsutum_cytokinin_oxidase/dehydrogenase_(CKX)_mRNA,_complete_cds
Gorai.010G065800-JGI_221_v2.1	7.17154	3.87138	1	Gorai.010G065800	gi|519746509|gb|JX614617.1|_Gossypium_hirsutum_clone_NBRI_GE58146_microsatellite_sequence
Gorai.010G062000-JGI_221_v2.1	7.61124	3.9528	1	Gorai.010G062000	gi|519695280|gb|JX589175.1|_Gossypium_hirsutum_clone_NBRI_GE23812_microsatellite_sequence
Gorai.010G055100-JGI_221_v2.1	6.014	5.20258	1	Gorai.010G055100	___NoMatchedTerm___
Gorai.010G045500-JGI_221_v2.1	7.65933	7.76267	1	Gorai.010G045500	gi|529062250|gb|JX963914.1|_Gossypium_hirsutum_clone_NBRI_TRANS-183_microsatellite_sequence
Gorai.010G045200-JGI_221_v2.1	7.35795	7.04813	1	Gorai.010G045200	gi|519750659|gb|JX616720.1|_Gossypium_hirsutum_clone_NBRI_GE61581_microsatellite_sequence
Gorai.010G023400-JGI_221_v2.1	5.89852	7.63309	1	Gorai.010G023400	___NoMatchedTerm___
Gorai.010G022300-JGI_221_v2.1	6.48348	4.7262	1	Gorai.010G022300	___NoMatchedTerm___
Gorai.009G445500-JGI_221_v2.1	5.97652	6.99299	1	Gorai.009G445500	gi|519684109|gb|JX578004.1|_Gossypium_hirsutum_clone_NBRI_GE9938_microsatellite_sequence
Gorai.009G410600-JGI_221_v2.1	8.18803	7.401	1	Gorai.009G410600	___NoMatchedTerm___
Gorai.009G380400-JGI_221_v2.1	6.25216	5.81367	1	Gorai.009G380400	gi|507308555|gb|GQ227428.1|_Gossypium_hirsutum_clone_GhRGA-GK-71_NBS-LRR_resistance_protein-like_protein_gene,_partial_cds
Gorai.009G340100-JGI_221_v2.1	6.18803	5.48109	1	Gorai.009G340100	___NoMatchedTerm___
Gorai.009G327000-JGI_221_v2.1	6.56149	5.82407	1	Gorai.009G327000	gi|519696529|gb|JX590424.1|_Gossypium_hirsutum_clone_NBRI_GE25329_microsatellite_sequence
Gorai.009G315100-JGI_221_v2.1	7.06845	7.38441	1	Gorai.009G315100	___NoMatchedTerm___
Gorai.009G307700-JGI_221_v2.1	5.53595	5.47177	1	Gorai.009G307700	gi|459354681|gb|KC246034.1|_Gossypium_arboreum_clone_GaSIM-2_cyclin-dependent_protein_kinase_inhibitor_Siamese_mRNA,_complete_cds
Gorai.009G281300-JGI_221_v2.1	5.71816	7.16511	1	Gorai.009G281300	gi|529066246|gb|JX964156.1|_Gossypium_hirsutum_clone_NBRI_TRANS-425_microsatellite_sequence
Gorai.009G276300-JGI_221_v2.1	6.81606	7.0116	1	Gorai.009G276300	___NoMatchedTerm___
Gorai.009G251000-JGI_221_v2.1	3.92375	6.83473	1	Gorai.009G251000	___NoMatchedTerm___
Gorai.009G242500-JGI_221_v2.1	8.00472	7.16915	1	Gorai.009G242500	gi|2244737|dbj|D88416.1|_Gossypium_hirsutum_mRNA_for_endo-1,3-beta-glucanase,_clone_CF922,_partial_cds
Gorai.009G234500-JGI_221_v2.1	7.13799	7.94537	1	Gorai.009G234500	gi|20377324|gb|AF351377.1|_Gossypium_hirsutum_clone_JESPR139_microsatellite_sequence
Gorai.009G214300-JGI_221_v2.1	4.05303	5.5896	1	Gorai.009G214300	gi|33324519|gb|AF509502.1|_Gossypium_hirsutum_dehydration_responsive_element_binding_protein_(DREB)_mRNA,_complete_cds
Gorai.009G205800-JGI_221_v2.1	6.08615	4.69854	1	Gorai.009G205800	___NoMatchedTerm___
Gorai.009G146100-JGI_221_v2.1	6.25216	6.18563	1	Gorai.009G146100	___NoMatchedTerm___
Gorai.009G125500-JGI_221_v2.1	9.1123	7.6451	1	Gorai.009G125500	___NoMatchedTerm___
Gorai.009G115400-JGI_221_v2.1	6.99538	7.0116	1	Gorai.009G115400	___NoMatchedTerm___
Gorai.009G104800-JGI_221_v2.1	7.94777	4.81367	1	Gorai.009G104800	gi|256537771|gb|GQ394826.1|_Gossypium_hirsutum_cultivar_Delta_Opal_clone_MONCS1849_SSR_marker_DPL0056_genomic_sequence
Gorai.009G047800-JGI_221_v2.1	3.87794	5.7706	1	Gorai.009G047800	___NoMatchedTerm___
Gorai.009G042000-JGI_221_v2.1	8.62946	4.7262	1	Gorai.009G042000	___NoMatchedTerm___
Gorai.009G033300-JGI_221_v2.1	6.70588	4.29222	1	Gorai.009G033300	___NoMatchedTerm___
Gorai.009G018700-JGI_221_v2.1	5.18803	6.53356	1	Gorai.009G018700	gi|317174869|gb|HQ527088.1|_Gossypium_herbaceum_clone_NBRI_D2_2480_simple_sequence_repeat_marker,_mRNA_sequence
Gorai.009G017500-JGI_221_v2.1	6.28319	5.18563	1	Gorai.009G017500	___NoMatchedTerm___
Gorai.008G272900-JGI_221_v2.1	4.4936	7.66872	1	Gorai.008G272900	___NoMatchedTerm___
Gorai.008G259700-JGI_221_v2.1	4.97652	5.63309	1	Gorai.008G259700	gi|307159057|gb|GQ921837.1|_Gossypium_hirsutum_NAC_trascription_factor_3_(nst3)_mRNA,_complete_cds
Gorai.008G245300-JGI_221_v2.1	7.13799	7.22096	1	Gorai.008G245300	___NoMatchedTerm___
Gorai.008G190500-JGI_221_v2.1	5.93805	5.3095	1	Gorai.008G190500	gi|256537778|gb|GQ394833.1|_Gossypium_hirsutum_cultivar_Delta_Opal_clone_MONCS1856_SSR_marker_DPL0070_genomic_sequence
Gorai.008G164100-JGI_221_v2.1	7.92827	6.63309	1	Gorai.008G164100	___NoMatchedTerm___
Gorai.008G163800-JGI_221_v2.1	7.75096	7.16915	1	Gorai.008G163800	___NoMatchedTerm___
Gorai.008G163600-JGI_221_v2.1	7.59896	5.93955	1	Gorai.008G163600	___NoMatchedTerm___
Gorai.008G157000-JGI_221_v2.1	6.37245	6.18397	1	Gorai.008G157000	___NoMatchedTerm___
Gorai.008G137400-JGI_221_v2.1	7.63549	5.85549	1	Gorai.008G137400	gi|519684436|gb|JX578331.1|_Gossypium_hirsutum_clone_NBRI_GE10330_microsatellite_sequence
Gorai.008G130500-JGI_221_v2.1	5.48348	7.34091	1	Gorai.008G130500	___NoMatchedTerm___
Gorai.008G105100-JGI_221_v2.1	4.80639	6.00464	1	Gorai.008G105100	gi|519683184|gb|JX577079.1|_Gossypium_hirsutum_clone_NBRI_GE8832_microsatellite_sequence
Gorai.008G102800-JGI_221_v2.1	6.15486	4.56104	1	Gorai.008G102800	___NoMatchedTerm___
Gorai.008G099900-JGI_221_v2.1	7.31356	7.85549	1	Gorai.008G099900	___NoMatchedTerm___
Gorai.008G063700-JGI_221_v2.1	7.29845	8.10124	1	Gorai.008G063700	___NoMatchedTerm___
Gorai.008G063000-JGI_221_v2.1	7.32851	7.46767	1	Gorai.008G063000	gi|519749271|gb|JX615962.1|_Gossypium_hirsutum_clone_NBRI_GE60262_microsatellite_sequence
Gorai.008G033200-JGI_221_v2.1	4.53595	5.31116	1	Gorai.008G033200	___NoMatchedTerm___
Gorai.008G012500-JGI_221_v2.1	3.50871	5.81367	1	Gorai.008G012500	___NoMatchedTerm___
Gorai.007G339300-JGI_221_v2.1	6.014	5.63309	1	Gorai.007G339300	___NoMatchedTerm___
Gorai.007G336400-JGI_221_v2.1	7.59896	6.85549	1	Gorai.007G336400	___NoMatchedTerm___
Gorai.007G297500-JGI_221_v2.1	6.22045	5.24976	1	Gorai.007G297500	gi|519692247|gb|JX586142.1|_Gossypium_hirsutum_clone_NBRI_GE19887_microsatellite_sequence
Gorai.007G289700-JGI_221_v2.1	6.70588	4.67207	1	Gorai.007G289700	gi|519684575|gb|JX578470.1|_Gossypium_hirsutum_clone_NBRI_GE10502_microsatellite_sequence
Gorai.007G267700-JGI_221_v2.1	5.53846	6.50756	1	Gorai.007G267700	gi|441037986|gb|JQ914139.1|_Gossypium_hirsutum_NAC_domain_protein_8_(NAC8)_mRNA,_complete_cds
Gorai.007G261500-JGI_221_v2.1	5.93805	5.75007	1	Gorai.007G261500	gi|519687871|gb|JX581766.1|_Gossypium_hirsutum_clone_NBRI_GE14471_microsatellite_sequence
Gorai.007G248500-JGI_221_v2.1	4.81606	5.00464	1	Gorai.007G248500	___NoMatchedTerm___
Gorai.007G228400-JGI_221_v2.1	7.38681	6.74857	1	Gorai.007G228400	___NoMatchedTerm___
Gorai.007G225100-JGI_221_v2.1	7.15486	7.58418	1	Gorai.007G225100	___NoMatchedTerm___
Gorai.007G219500-JGI_221_v2.1	7.69438	5.3095	1	Gorai.007G219500	___NoMatchedTerm___
Gorai.007G217000-JGI_221_v2.1	6.18803	5.3095	1	Gorai.007G217000	___NoMatchedTerm___
Gorai.007G169400-JGI_221_v2.1	6.22045	8.78148	1	Gorai.007G169400	gi|317173715|gb|HQ525934.1|_Gossypium_herbaceum_clone_NBRI_A_EYI1BW401B8BGO_simple_sequence_repeat_marker,_mRNA_sequence
Gorai.007G167500-JGI_221_v2.1	7.76202	7.65694	1	Gorai.007G167500	___NoMatchedTerm___
Gorai.007G162300-JGI_221_v2.1	7.48348	5.47177	1	Gorai.007G162300	___NoMatchedTerm___
Gorai.007G138600-JGI_221_v2.1	7.86815	8.67457	1	Gorai.007G138600	___NoMatchedTerm___
Gorai.007G122500-JGI_221_v2.1	5.81606	6.81367	1	Gorai.007G122500	gi|519694393|gb|JX588288.1|_Gossypium_hirsutum_clone_NBRI_GE22672_microsatellite_sequence
Gorai.007G056400-JGI_221_v2.1	3.92375	6.24976	1	Gorai.007G056400	gi|519706674|gb|JX600132.1|_Gossypium_hirsutum_clone_NBRI_GE37847_microsatellite_sequence
Gorai.007G027400-JGI_221_v2.1	9.44627	8.53998	1	Gorai.007G027400	___NoMatchedTerm___
Gorai.006G249500-JGI_221_v2.1	5.93805	5.47177	1	Gorai.006G249500	___NoMatchedTerm___
Gorai.006G240400-JGI_221_v2.1	6.75096	7.21806	1	Gorai.006G240400	___NoMatchedTerm___
Gorai.006G229400-JGI_221_v2.1	7.90851	8.0116	1	Gorai.006G229400	gi|519685332|gb|JX579227.1|_Gossypium_hirsutum_clone_NBRI_GE11429_microsatellite_sequence
Gorai.006G195700-JGI_221_v2.1	6.63549	4.82407	1	Gorai.006G195700	gi|151303114|gb|EF651783.1|_Gossypium_hirsutum_transcription_factor_TF1_(TF1)_mRNA,_complete_cds
Gorai.006G148100-JGI_221_v2.1	6.87834	4.44074	1	Gorai.006G148100	___NoMatchedTerm___
Gorai.006G146500-JGI_221_v2.1	4.63549	5.81367	1	Gorai.006G146500	___NoMatchedTerm___
Gorai.006G066200-JGI_221_v2.1	5.25216	5.7706	1	Gorai.006G066200	___NoMatchedTerm___
Gorai.006G057800-JGI_221_v2.1	5.05053	5.7706	1	Gorai.006G057800	gi|529070584|gb|JX964580.1|_Gossypium_hirsutum_clone_NBRI_TRANS-849_microsatellite_sequence
Gorai.006G022800-JGI_221_v2.1	6.05053	5.04646	1	Gorai.006G022800	___NoMatchedTerm___
Gorai.005G256700-JGI_221_v2.1	4.7286	5.18563	1	Gorai.005G256700	___NoMatchedTerm___
Gorai.005G256600-JGI_221_v2.1	5.58658	5.6804	1	Gorai.005G256600	___NoMatchedTerm___
Gorai.005G251700-JGI_221_v2.1	5.1332	7.99299	1	Gorai.005G251700	___NoMatchedTerm___
Gorai.005G231200-JGI_221_v2.1	5.63549	5.75007	1	Gorai.005G231200	___NoMatchedTerm___
Gorai.005G215900-JGI_221_v2.1	6.25216	6.58418	1	Gorai.005G215900	gi|519746562|gb|JX614644.1|_Gossypium_hirsutum_clone_NBRI_GE58195_microsatellite_sequence
Gorai.005G196400-JGI_221_v2.1	5.85788	5.85549	1	Gorai.005G196400	___NoMatchedTerm___
Gorai.005G172200-JGI_221_v2.1	6.50996	5.58418	1	Gorai.005G172200	___NoMatchedTerm___
Gorai.005G154500-JGI_221_v2.1	7.82663	6.70348	1	Gorai.005G154500	gi|519684399|gb|JX578294.1|_Gossypium_hirsutum_clone_NBRI_GE10289_microsatellite_sequence
Gorai.005G142900-JGI_221_v2.1	4.20915	6.7706	1	Gorai.005G142900	___NoMatchedTerm___
Gorai.005G138500-JGI_221_v2.1	5.7286	6.04813	1	Gorai.005G138500	gi|256536014|gb|GQ393069.1|_Gossypium_hirsutum_cultivar_Deltapine_20_clone_MONCS0050_SSR_marker_C2-0079_genomic_sequence
Gorai.005G129000-JGI_221_v2.1	5.35001	4.77516	1	Gorai.005G129000	gi|317174340|gb|HQ526559.1|_Gossypium_herbaceum_clone_NBRI_D_EYT27PB02ERZ9K_simple_sequence_repeat_marker,_mRNA_sequence
Gorai.005G043700-JGI_221_v2.1	9.02781	5.48109	1	Gorai.005G043700	___NoMatchedTerm___
Gorai.005G022600-JGI_221_v2.1	6.08615	7.96461	1	Gorai.005G022600	gi|153805693|gb|EF643506.1|_Gossypium_hirsutum_cysteine_proteinase_inhibitor_(CPI)_mRNA,_complete_cds
Gorai.004G290400-JGI_221_v2.1	4.1332	5.56104	1	Gorai.004G290400	___NoMatchedTerm___
Gorai.004G287900-JGI_221_v2.1	8.63549	7.6804	1	Gorai.004G287900	___NoMatchedTerm___
Gorai.004G257700-JGI_221_v2.1	6.70588	5.7706	1	Gorai.004G257700	___NoMatchedTerm___
Gorai.004G254300-JGI_221_v2.1	7.06845	4.72453	1	Gorai.004G254300	___NoMatchedTerm___
Gorai.004G201700-JGI_221_v2.1	7.64746	7.0257	1	Gorai.004G201700	gi|312032579|gb|AC243146.1|_Gossypium_hirsutum_clone_MX073K14-jni,_complete_sequence
Gorai.004G192300-JGI_221_v2.1	5.25216	5.04813	1	Gorai.004G192300	gi|519688274|gb|JX582169.1|_Gossypium_hirsutum_clone_NBRI_GE14950_microsatellite_sequence
Gorai.004G164400-JGI_221_v2.1	7.42904	6.56104	1	Gorai.004G164400	___NoMatchedTerm___
Gorai.004G154700-JGI_221_v2.1	4.81606	5.53356	1	Gorai.004G154700	gi|519683742|gb|JX577637.1|_Gossypium_hirsutum_clone_NBRI_GE9497_microsatellite_sequence
Gorai.004G149700-JGI_221_v2.1	5.85788	7.08375	1	Gorai.004G149700	gi|529066835|gb|JX964244.1|_Gossypium_hirsutum_clone_NBRI_TRANS-513_microsatellite_sequence
Gorai.004G086600-JGI_221_v2.1	5.19053	5.1004	1	Gorai.004G086600	gi|256536420|gb|GQ393475.1|_Gossypium_hirsutum_cultivar_Deltapine_33_B_clone_MONCS0440_SSR_marker_CGR5433_genomic_sequence
Gorai.004G065100-JGI_221_v2.1	7.18803	5.40903	1	Gorai.004G065100	gi|256538060|gb|GQ395115.1|_Gossypium_hirsutum_cultivar_Delta_Opal_clone_MONCS2138_SSR_marker_DPL0688_genomic_sequence
Gorai.004G026500-JGI_221_v2.1	5.81606	5.7706	1	Gorai.004G026500	___NoMatchedTerm___
Gorai.004G026400-JGI_221_v2.1	6.79469	5.24976	1	Gorai.004G026400	___NoMatchedTerm___
Gorai.004G026200-JGI_221_v2.1	8.30603	6.81367	1	Gorai.004G026200	___NoMatchedTerm___
Gorai.004G019400-JGI_221_v2.1	5.63549	5.7262	1	Gorai.004G019400	___NoMatchedTerm___
Gorai.004G001400-JGI_221_v2.1	6.61124	5.93566	1	Gorai.004G001400	gi|256568428|gb|FJ646599.1|_Gossypium_hirsutum_PIP_protein_(PIP2;8)_mRNA,_complete_cds
Gorai.003G183200-JGI_221_v2.1	6.58658	4.96157	1	Gorai.003G183200	gi|312032597|gb|AC243165.1|_Gossypium_hirsutum_clone_MX179E13-jom,_complete_sequence
Gorai.003G166100-JGI_221_v2.1	5.42904	6.34091	1	Gorai.003G166100	gi|14334056|gb|AF332974.1|AF332974_Gossypium_arboreum_P450_monooxygenase_mRNA,_complete_cds
Gorai.003G140500-JGI_221_v2.1	6.14292	6.93566	1	Gorai.003G140500	___NoMatchedTerm___
Gorai.003G090000-JGI_221_v2.1	7.15486	7.39863	1	Gorai.003G090000	gi|57282622|emb|AJ606075.1|_Gossypium_hirsutum_mRNA_for_peroxidase_(pox_gene),_strain_Xuzhou_142
Gorai.003G088700-JGI_221_v2.1	6.56149	6.37006	1	Gorai.003G088700	gi|57282622|emb|AJ606075.1|_Gossypium_hirsutum_mRNA_for_peroxidase_(pox_gene),_strain_Xuzhou_142
Gorai.003G077700-JGI_221_v2.1	5.77299	5.93566	1	Gorai.003G077700	gi|307752650|gb|GQ921836.1|_Gossypium_hirsutum_NAC_trascription_factor_1_(nst1)_mRNA,_complete_cds
Gorai.003G071600-JGI_221_v2.1	5.68279	6.24976	1	Gorai.003G071600	___NoMatchedTerm___
Gorai.003G007800-JGI_221_v2.1	3.38318	5.11852	1	Gorai.003G007800	gi|519685800|gb|JX579695.1|_Gossypium_hirsutum_clone_NBRI_GE11986_microsatellite_sequence
Gorai.003G003400-JGI_221_v2.1	6.37245	7.15247	1	Gorai.003G003400	gi|519758711|gb|JX620675.1|_Gossypium_hirsutum_clone_NBRI_GE66973_microsatellite_sequence
Gorai.002G265300-JGI_221_v2.1	7.967	6.31116	1	Gorai.002G265300	___NoMatchedTerm___
Gorai.002G197100-JGI_221_v2.1	7.7286	6.53356	1	Gorai.002G197100	gi|45758291|gb|AY438035.1|_Gossypium_hirsutum_beta-galactosidase_mRNA,_complete_cds
Gorai.002G174600-JGI_221_v2.1	7.20433	8.44045	1	Gorai.002G174600	___NoMatchedTerm___
Gorai.002G153600-JGI_221_v2.1	5.36669	7.26536	1	Gorai.002G153600	___NoMatchedTerm___
Gorai.002G132400-JGI_221_v2.1	6.50996	6.32657	1	Gorai.002G132400	___NoMatchedTerm___
Gorai.002G118700-JGI_221_v2.1	6.42904	6.75007	1	Gorai.002G118700	gi|519685735|gb|JX579630.1|_Gossypium_hirsutum_clone_NBRI_GE11905_microsatellite_sequence
Gorai.002G092000-JGI_221_v2.1	6.83712	6.25703	1	Gorai.002G092000	___NoMatchedTerm___
Gorai.002G040500-JGI_221_v2.1	6.40102	5.3095	1	Gorai.002G040500	___NoMatchedTerm___
Gorai.002G007800-JGI_221_v2.1	7.26776	7.70348	1	Gorai.002G007800	___NoMatchedTerm___
Gorai.002G004800-JGI_221_v2.1	7.61124	7.88607	1	Gorai.002G004800	___NoMatchedTerm___
Gorai.001G270500-JGI_221_v2.1	3.5676	5.89613	1	Gorai.001G270500	gi|312032581|gb|AC243149.1|_Gossypium_hirsutum_clone_MX089E03-jhm,_complete_sequence
Gorai.001G239000-JGI_221_v2.1	6.87834	3.93955	1	Gorai.001G239000	gi|73761704|gb|DQ118243.1|_Gossypium_hirsutum_myb_transcription_factor_MYB30_mRNA,_complete_cds
Gorai.001G230400-JGI_221_v2.1	6.85788	5.96157	1	Gorai.001G230400	gi|38016530|gb|AY429443.1|_Gossypium_barbadense_fiber_quinone-oxidoreductase_mRNA,_partial_cds
Gorai.001G228500-JGI_221_v2.1	2.83064	6.31116	1	Gorai.001G228500	gi|317172978|gb|HQ525197.1|_Gossypium_herbaceum_clone_NBRI_D2_628_simple_sequence_repeat_marker,_mRNA_sequence
Gorai.001G224400-JGI_221_v2.1	4.97652	6.11852	1	Gorai.001G224400	___NoMatchedTerm___
Gorai.001G115700-JGI_221_v2.1	6.08615	6.58418	1	Gorai.001G115700	gi|519695204|gb|JX589099.1|_Gossypium_hirsutum_clone_NBRI_GE23724_microsatellite_sequence
Gorai.001G075600-JGI_221_v2.1	5.12091	6.11852	1	Gorai.001G075600	___NoMatchedTerm___
Gorai.001G039600-JGI_221_v2.1	4.47834	6.18397	1	Gorai.001G039600	___NoMatchedTerm___
Gorai.009G185300-JGI_221_v2.1	6.42904	-0.717536	1	Gorai.009G185300	gi|519687237|gb|JX581132.1|_Gossypium_hirsutum_clone_NBRI_GE13700_microsatellite_sequence
Gorai.011G040100-JGI_221_v2.1	3.89852	1.23911	1	Gorai.011G040100	___NoMatchedTerm___
Gorai.009G322300-JGI_221_v2.1	3.89852	1.05468	1	Gorai.009G322300	___NoMatchedTerm___
Gorai.009G321200-JGI_221_v2.1	5.68279	0.527233	1	Gorai.009G321200	gi|519762812|gb|JX622509.1|_Gossypium_hirsutum_clone_NBRI_GE69264_microsatellite_sequence
Gorai.008G165300-JGI_221_v2.1	3.7286	1.29569	1	Gorai.008G165300	gi|317174647|gb|HQ526866.1|_Gossypium_herbaceum_clone_NBRI_E_4474_simple_sequence_repeat_marker,_mRNA_sequence
Gorai.005G039600-JGI_221_v2.1	6.014	-0.170283	1	Gorai.005G039600	gi|312032539|gb|AC243106.1|_Gossypium_raimondii_clone_GR__Ba0005I14-jfn,_complete_sequence
Gorai.002G224100-JGI_221_v2.1	5.12091	0.431753	1	Gorai.002G224100	___NoMatchedTerm___
Gorai.010G182700-JGI_221_v2.1	3.89852	1.50214	1	Gorai.010G182700	___NoMatchedTerm___
Gorai.010G111900-JGI_221_v2.1	3.31356	1.50214	1	Gorai.010G111900	gi|188509935|gb|EU626442.1|_Gossypium_raimondii_clone_BAC_031J10,_complete_sequence
Gorai.007G124700-JGI_221_v2.1	3.53595	2.23911	1	Gorai.007G124700	___NoMatchedTerm___
Gorai.009G165200-JGI_221_v2.1	3.36065	1.53796	1	Gorai.009G165200	gi|519684127|gb|JX578022.1|_Gossypium_hirsutum_clone_NBRI_GE9960_microsatellite_sequence
Gorai.009G012900-JGI_221_v2.1	3.64	1.87018	1	Gorai.009G012900	___NoMatchedTerm___
Gorai.008G297500-JGI_221_v2.1	3.49023	1.373	1	Gorai.008G297500	___NoMatchedTerm___
Gorai.008G250900-JGI_221_v2.1	3.43659	1.9273	1	Gorai.008G250900	gi|317173731|gb|HQ525950.1|_Gossypium_herbaceum_clone_NBRI_B2_44_simple_sequence_repeat_marker,_mRNA_sequence
Gorai.008G159900-JGI_221_v2.1	3.76924	1.23217	1	Gorai.008G159900	gi|519683834|gb|JX577729.1|_Gossypium_hirsutum_clone_NBRI_GE9606_microsatellite_sequence
Gorai.008G135900-JGI_221_v2.1	3.79869	1.55013	1	Gorai.008G135900	gi|307948773|gb|HM370495.1|_Gossypium_hirsutum_S-adenosylmethionine_synthetase_(SAMS)_mRNA,_complete_cds
Gorai.007G175100-JGI_221_v2.1	4.00167	1.38387	1	Gorai.007G175100	___NoMatchedTerm___
Gorai.007G081800-JGI_221_v2.1	4.12604	3.39362	1	Gorai.007G081800	gi|211906437|gb|FJ415166.1|_Gossypium_hirsutum_clone_Spot9_UDP-D-glucose_dehydrogenase_mRNA,_complete_cds
Gorai.006G165900-JGI_221_v2.1	4.14573	2.32833	1	Gorai.006G165900	gi|519695514|gb|JX589409.1|_Gossypium_hirsutum_clone_NBRI_GE24102_microsatellite_sequence
Gorai.006G065800-JGI_221_v2.1	3.7663	1.663	1	Gorai.006G065800	gi|256861677|gb|GQ411495.1|_Gossypium_hirsutum_cultivar_Handan_5833_fiber-specific_protein_(SCFP)_gene,_promoter_region_and_5'_UTR
Gorai.005G069400-JGI_221_v2.1	4.1579	1.73267	1	Gorai.005G069400	gi|211906491|gb|FJ415193.1|_Gossypium_hirsutum_clone_SpotW12_dihydrolipoamide_dehydrogenase_mRNA,_complete_cds
Gorai.005G035100-JGI_221_v2.1	3.97598	1.7224	1	Gorai.005G035100	gi|347466179|gb|JF795272.1|_Gossypium_hirsutum_chalcone_synthase_(CHS2)_mRNA,_complete_cds
Gorai.004G251500-JGI_221_v2.1	4.33003	2.46953	1	Gorai.004G251500	___NoMatchedTerm___
Gorai.004G184100-JGI_221_v2.1	4.80545	1.91261	1	Gorai.004G184100	gi|519765212|gb|JX623101.1|_Gossypium_hirsutum_clone_NBRI_GE70140_microsatellite_sequence
Gorai.004G146600-JGI_221_v2.1	3.55779	1.96827	1	Gorai.004G146600	___NoMatchedTerm___
Gorai.004G063900-JGI_221_v2.1	3.7661	1.7181	1	Gorai.004G063900	gi|519684423|gb|JX578318.1|_Gossypium_hirsutum_clone_NBRI_GE10314_microsatellite_sequence
Gorai.003G158100-JGI_221_v2.1	3.86028	1.39009	1	Gorai.003G158100	gi|89212807|gb|DQ402075.1|_Gossypium_hirsutum_aquaporin_1_(AQP1)_mRNA,_complete_cds
Gorai.002G222900-JGI_221_v2.1	4.81982	2.20352	1	Gorai.002G222900	gi|317175783|gb|HQ528002.1|_Gossypium_herbaceum_clone_NBRI_C2_853_simple_sequence_repeat_marker,_mRNA_sequence
Gorai.002G113400-JGI_221_v2.1	3.82875	2.52622	1	Gorai.002G113400	gi|312032592|gb|AC243160.1|_Gossypium_hirsutum_clone_MX146F18-joh,_complete_sequence
Gorai.002G094900-JGI_221_v2.1	3.44049	1.5057	1	Gorai.002G094900	___NoMatchedTerm___
Gorai.001G082300-JGI_221_v2.1	3.62275	1.45242	1	Gorai.001G082300	___NoMatchedTerm___
Gorai.002G030200-JGI_221_v2.1	3.34948	1.47177	1	Gorai.002G030200	___NoMatchedTerm___
Gorai.013G124500-JGI_221_v2.1	4.29298	2.122	1	Gorai.013G124500	gi|124365600|gb|AF361893.4|_Gossypium_hirsutum_bacterial-induced_lipoxygenase_(Lox1)_mRNA,_complete_cds
Gorai.013G089300-JGI_221_v2.1	5.81722	3.04576	1	Gorai.013G089300	gi|256535966|gb|GQ393021.1|_Gossypium_hirsutum_cultivar_Deltapine_20_clone_MONCS0002_SSR_marker_C2-0002B_genomic_sequence
Gorai.013G050000-JGI_221_v2.1	3.9043	2.22124	1	Gorai.013G050000	___NoMatchedTerm___
Gorai.013G037400-JGI_221_v2.1	5.16533	2.21264	1	Gorai.013G037400	gi|4126472|dbj|AB014884.1|_Gossypium_hirsutum_GhCAP_mRNA_for_adenylyl_cyclase_associated_protein,_complete_cds
Gorai.012G179300-JGI_221_v2.1	4.97541	1.55461	1	Gorai.012G179300	gi|211906501|gb|FJ415198.1|_Gossypium_hirsutum_clone_Spotw6_Isocitrate_dehydrogenase_mRNA,_complete_cds
Gorai.012G155000-JGI_221_v2.1	3.92849	2.08851	1	Gorai.012G155000	gi|529062984|gb|JX964038.1|_Gossypium_hirsutum_clone_NBRI_TRANS-307_microsatellite_sequence
Gorai.012G152300-JGI_221_v2.1	5.06943	0.900691	1	Gorai.012G152300	___NoMatchedTerm___
Gorai.012G036800-JGI_221_v2.1	3.65555	1.29485	1	Gorai.012G036800	gi|39652108|emb|AJ567198.1|_Gossypium_hirsutum_microsatellite_DNA_mGhCIR253,_clone_CIR253
Gorai.012G004700-JGI_221_v2.1	3.54993	2.25216	1	Gorai.012G004700	___NoMatchedTerm___
Gorai.011G153400-JGI_221_v2.1	3.72372	1.78279	1	Gorai.011G153400	gi|529068044|gb|JX964410.1|_Gossypium_hirsutum_clone_NBRI_TRANS-679_microsatellite_sequence
Gorai.011G054100-JGI_221_v2.1	5.72335	1.84521	1	Gorai.011G054100	gi|317172556|gb|HQ524775.1|_Gossypium_herbaceum_clone_NBRI_A_1513_simple_sequence_repeat_marker,_mRNA_sequence
Gorai.011G026000-JGI_221_v2.1	4.15684	1.89351	1	Gorai.011G026000	gi|317173897|gb|HQ526116.1|_Gossypium_herbaceum_clone_NBRI_D_5268_simple_sequence_repeat_marker,_mRNA_sequence
Gorai.010G222300-JGI_221_v2.1	3.83749	1.61591	1	Gorai.010G222300	gi|519691448|gb|JX585343.1|_Gossypium_hirsutum_clone_NBRI_GE18877_microsatellite_sequence
Gorai.010G221900-JGI_221_v2.1	3.70649	2.69424	1	Gorai.010G221900	___NoMatchedTerm___
Gorai.010G181500-JGI_221_v2.1	4.03066	1.51404	1	Gorai.010G181500	___NoMatchedTerm___
Gorai.010G021600-JGI_221_v2.1	3.5676	2.60749	1	Gorai.010G021600	gi|119221391|gb|EF159965.1|_Gossypium_hirsutum_clone_Met-HMTGC-EACT_genomic_sequence
Gorai.009G332400-JGI_221_v2.1	3.5414	2.18244	1	Gorai.009G332400	___NoMatchedTerm___
Gorai.009G258500-JGI_221_v2.1	3.47218	2.00351	1	Gorai.009G258500	gi|519762972|gb|JX622595.1|_Gossypium_hirsutum_clone_NBRI_GE69396_microsatellite_sequence
Gorai.009G253900-JGI_221_v2.1	4.24568	2.32193	1	Gorai.009G253900	gi|330370897|gb|JF495678.1|_Gossypium_herbaceum_clone_NBRI_M187_simple_sequence_repeat_marker,_genomic_sequence
Gorai.009G237600-JGI_221_v2.1	4.2429	1.8692	1	Gorai.009G237600	___NoMatchedTerm___
Gorai.009G143100-JGI_221_v2.1	3.84091	1.89866	1	Gorai.009G143100	___NoMatchedTerm___
Gorai.009G120300-JGI_221_v2.1	3.75302	2.37363	1	Gorai.009G120300	___NoMatchedTerm___
Gorai.009G064700-JGI_221_v2.1	3.90674	2.17505	1	Gorai.009G064700	gi|211906533|gb|FJ415214.1|_Gossypium_hirsutum_clone_Ghpox3_class_III_peroxidase_(POX3)_mRNA,_complete_cds
Gorai.009G040700-JGI_221_v2.1	6.35559	1.67163	1	Gorai.009G040700	___NoMatchedTerm___
Gorai.008G295900-JGI_221_v2.1	4.41239	1.20317	1	Gorai.008G295900	gi|315307480|gb|HQ650106.1|_Gossypium_hirsutum_clone_BAC_067L14,_complete_sequence
Gorai.008G273200-JGI_221_v2.1	3.55136	2.17554	1	Gorai.008G273200	___NoMatchedTerm___
Gorai.008G221800-JGI_221_v2.1	4.18349	2.16802	1	Gorai.008G221800	___NoMatchedTerm___
Gorai.008G213300-JGI_221_v2.1	3.61025	2.31029	1	Gorai.008G213300	___NoMatchedTerm___
Gorai.008G211700-JGI_221_v2.1	3.74648	2.08209	1	Gorai.008G211700	gi|519691916|gb|JX585811.1|_Gossypium_hirsutum_clone_NBRI_GE19478_microsatellite_sequence
Gorai.008G158600-JGI_221_v2.1	3.5676	1.51826	1	Gorai.008G158600	___NoMatchedTerm___
Gorai.008G136300-JGI_221_v2.1	4.66714	1.90164	1	Gorai.008G136300	gi|256537077|gb|GQ394132.1|_Gossypium_hirsutum_cultivar_Deltapine_33_B_clone_MONCS1097_SSR_marker_CGR6677_genomic_sequence
Gorai.008G095900-JGI_221_v2.1	4.07575	2.81948	1	Gorai.008G095900	gi|283488488|gb|GQ292785.1|_Gossypium_hirsutum_UDP-D-glucose_dehydrogenase_(UGD3)_mRNA,_complete_cds
Gorai.008G079900-JGI_221_v2.1	4.20915	2.25311	1	Gorai.008G079900	___NoMatchedTerm___
Gorai.008G046400-JGI_221_v2.1	3.63341	2.82006	1	Gorai.008G046400	gi|317172922|gb|HQ525141.1|_Gossypium_herbaceum_clone_NBRI_B_EYI1BW404I4EBB_simple_sequence_repeat_marker,_mRNA_sequence
Gorai.007G268300-JGI_221_v2.1	3.91621	1.87298	1	Gorai.007G268300	gi|300793636|tpg|BK007063.1|_TPA_inf:_Gossypium_hirsutum_aquaporin_SIP1;2_mRNA,_complete_cds
Gorai.007G227300-JGI_221_v2.1	4.51727	1.73725	1	Gorai.007G227300	gi|166977663|gb|EU373071.1|_Gossypium_hirsutum_gland_development_related_protein_81-like_mRNA,_complete_sequence
Gorai.007G187600-JGI_221_v2.1	3.5936	1.47357	1	Gorai.007G187600	___NoMatchedTerm___
Gorai.007G186000-JGI_221_v2.1	3.77936	2.68815	1	Gorai.007G186000	___NoMatchedTerm___
Gorai.007G149800-JGI_221_v2.1	3.51246	1.82724	1	Gorai.007G149800	gi|519748235|gb|JX615416.1|_Gossypium_hirsutum_clone_NBRI_GE59389_microsatellite_sequence
Gorai.007G120600-JGI_221_v2.1	4.40544	1.88973	1	Gorai.007G120600	gi|29028257|gb|AY217756.1|_Gossypium_hirsutum_ADP-ribosylation_factor_1_(ARF1)_mRNA,_complete_cds
Gorai.007G115600-JGI_221_v2.1	3.76295	1.8446	1	Gorai.007G115600	___NoMatchedTerm___
Gorai.007G090400-JGI_221_v2.1	3.72206	2.69534	1	Gorai.007G090400	gi|317173689|gb|HQ525908.1|_Gossypium_herbaceum_clone_NBRI_A2_2760_simple_sequence_repeat_marker,_mRNA_sequence
Gorai.007G047300-JGI_221_v2.1	4.59617	1.15534	1	Gorai.007G047300	gi|529062852|gb|JX964016.1|_Gossypium_hirsutum_clone_NBRI_TRANS-285_microsatellite_sequence
Gorai.007G026000-JGI_221_v2.1	4.34743	1.8207	1	Gorai.007G026000	gi|129771143|gb|EF453638.1|_Gossypium_hirsutum_clone_Ghf_DEG2_polygalacturonase_mRNA,_complete_cds
Gorai.006G202900-JGI_221_v2.1	4.1443	2.11545	1	Gorai.006G202900	gi|519688042|gb|JX581937.1|_Gossypium_hirsutum_clone_NBRI_GE14681_microsatellite_sequence
Gorai.006G175500-JGI_221_v2.1	3.92375	1.49682	1	Gorai.006G175500	___NoMatchedTerm___
Gorai.006G130500-JGI_221_v2.1	3.63034	2.75543	1	Gorai.006G130500	gi|519745863|gb|JX614355.1|_Gossypium_hirsutum_clone_NBRI_GE57668_microsatellite_sequence
Gorai.006G109100-JGI_221_v2.1	4.85449	2.13575	1	Gorai.006G109100	gi|317174378|gb|HQ526597.1|_Gossypium_herbaceum_clone_NBRI_A2_4390_simple_sequence_repeat_marker,_mRNA_sequence
Gorai.006G052800-JGI_221_v2.1	4.7311	2.04404	1	Gorai.006G052800	___NoMatchedTerm___
Gorai.006G025300-JGI_221_v2.1	3.55688	2.22562	1	Gorai.006G025300	gi|519750030|gb|JX616380.1|_Gossypium_hirsutum_clone_NBRI_GE60996_microsatellite_sequence
Gorai.005G240800-JGI_221_v2.1	4.11796	2.65713	1	Gorai.005G240800	___NoMatchedTerm___
Gorai.005G222600-JGI_221_v2.1	5.79103	1.96093	1	Gorai.005G222600	gi|164652939|gb|EU189223.1|_Gossypium_hirsutum_14-3-3d_protein_mRNA,_complete_cds
Gorai.005G157200-JGI_221_v2.1	3.36669	1.92823	1	Gorai.005G157200	gi|519748309|gb|JX615455.1|_Gossypium_hirsutum_clone_NBRI_GE59446_microsatellite_sequence
Gorai.005G050500-JGI_221_v2.1	4.16787	1.81334	1	Gorai.005G050500	gi|256537713|gb|GQ394768.1|_Gossypium_hirsutum_cultivar_Deltapine_90_clone_MONCS1791_SSR_marker_DC40366_genomic_sequence
Gorai.004G143300-JGI_221_v2.1	3.48446	1.75421	1	Gorai.004G143300	gi|341575452|gb|JN055433.1|_Gossypium_hirsutum_protein_disulfide_isomerase_(GHPDI12)_mRNA,_complete_cds
Gorai.004G143100-JGI_221_v2.1	3.44731	1.91718	1	Gorai.004G143100	___NoMatchedTerm___
Gorai.004G142900-JGI_221_v2.1	3.98395	2.30237	1	Gorai.004G142900	gi|127519338|gb|EF432568.1|_Gossypium_hirsutum_kinesin-related_protein_(kch2)_mRNA,_complete_cds
Gorai.004G114600-JGI_221_v2.1	4.52068	0.724534	1	Gorai.004G114600	gi|5834247|gb|AF175124.1|AF175124_Gossypium_hirsutum_SINAH1_protein_mRNA,_complete_cds
Gorai.004G109800-JGI_221_v2.1	3.63614	2.12429	1	Gorai.004G109800	___NoMatchedTerm___
Gorai.004G108700-JGI_221_v2.1	3.50347	2.18839	1	Gorai.004G108700	gi|307948771|gb|HM370494.1|_Gossypium_hirsutum_pyrophosphate-energized_vacuolar_membrane_proton_pump_(VP)_mRNA,_complete_cds
Gorai.004G026900-JGI_221_v2.1	3.55148	2.13408	1	Gorai.004G026900	___NoMatchedTerm___
Gorai.004G019900-JGI_221_v2.1	3.46432	2.14215	1	Gorai.004G019900	___NoMatchedTerm___
Gorai.004G008200-JGI_221_v2.1	4.16406	2.3807	1	Gorai.004G008200	gi|317173476|gb|HQ525695.1|_Gossypium_herbaceum_clone_NBRI_C_EYT27PB01BIKG6_simple_sequence_repeat_marker,_mRNA_sequence
Gorai.003G183800-JGI_221_v2.1	3.96188	2.87098	1	Gorai.003G183800	gi|6671364|gb|AF216497.1|AF216497_Gossypium_hirsutum_P-glycoprotein_(CMDR1)_mRNA,_complete_cds
Gorai.003G169200-JGI_221_v2.1	6.47449	0.606636	1	Gorai.003G169200	gi|295687232|gb|GU295065.1|_Gossypium_hirsutum_transaldolase_mRNA,_complete_cds
Gorai.003G149000-JGI_221_v2.1	3.62973	2.11264	1	Gorai.003G149000	___NoMatchedTerm___
Gorai.003G110800-JGI_221_v2.1	3.35306	1.64207	1	Gorai.003G110800	gi|519705908|gb|JX599366.1|_Gossypium_hirsutum_clone_NBRI_GE36844_microsatellite_sequence
Gorai.003G026200-JGI_221_v2.1	4.84051	2.804	1	Gorai.003G026200	gi|519695963|gb|JX589858.1|_Gossypium_hirsutum_clone_NBRI_GE24638_microsatellite_sequence
Gorai.003G005900-JGI_221_v2.1	3.5676	1.62133	1	Gorai.003G005900	___NoMatchedTerm___
Gorai.002G223200-JGI_221_v2.1	5.14098	1.79946	1	Gorai.002G223200	gi|519696113|gb|JX590008.1|_Gossypium_hirsutum_clone_NBRI_GE24820_microsatellite_sequence
Gorai.002G171700-JGI_221_v2.1	3.53425	1.47011	1	Gorai.002G171700	gi|529062168|gb|JX963901.1|_Gossypium_hirsutum_clone_NBRI_TRANS-170_microsatellite_sequence
Gorai.002G073400-JGI_221_v2.1	3.97251	3.55156	1	Gorai.002G073400	gi|29836416|gb|AY116158.1|_Gossypium_raimondii_putative_COP-1_interacting_protein_7_gene,_partial_cds
Gorai.001G275400-JGI_221_v2.1	3.74818	1.51368	1	Gorai.001G275400	gi|519686492|gb|JX580387.1|_Gossypium_hirsutum_clone_NBRI_GE12801_microsatellite_sequence
Gorai.001G268300-JGI_221_v2.1	3.42473	1.45484	1	Gorai.001G268300	gi|317174676|gb|HQ526895.1|_Gossypium_herbaceum_clone_NBRI_B_499_simple_sequence_repeat_marker,_mRNA_sequence
Gorai.001G229300-JGI_221_v2.1	3.52465	1.59234	1	Gorai.001G229300	___NoMatchedTerm___
Gorai.001G117600-JGI_221_v2.1	3.45718	1.65647	1	Gorai.001G117600	gi|519686045|gb|JX579940.1|_Gossypium_hirsutum_clone_NBRI_GE12276_microsatellite_sequence
Gorai.001G097900-JGI_221_v2.1	4.63799	2.29523	1	Gorai.001G097900	gi|157273637|gb|EF672628.1|_Gossypium_hirsutum_fasciclin-like_arabinogalactan_protein_2_(FLA2)_mRNA,_complete_cds
Gorai.001G068300-JGI_221_v2.1	4.06751	1.43971	1	Gorai.001G068300	gi|32364695|gb|AY255521.1|_Gossypium_hirsutum_ABC_transporter_(WBC1)_mRNA,_complete_cds
Gorai.013G264300-JGI_221_v2.1	4.59617	1.84483	1	Gorai.013G264300	gi|256536379|gb|GQ393434.1|_Gossypium_hirsutum_cultivar_Deltapine_33_B_clone_MONCS0399_SSR_marker_CGR5358_genomic_sequence
Gorai.013G233600-JGI_221_v2.1	4.8226	0.842482	1	Gorai.013G233600	gi|519746265|gb|JX614509.1|_Gossypium_hirsutum_clone_NBRI_GE57941_microsatellite_sequence
Gorai.013G025200-JGI_221_v2.1	4.06125	1.69118	1	Gorai.013G025200	gi|519705835|gb|JX599293.1|_Gossypium_hirsutum_clone_NBRI_GE36760_microsatellite_sequence
Gorai.012G154900-JGI_221_v2.1	3.39624	1.71236	1	Gorai.012G154900	___NoMatchedTerm___
Gorai.012G095200-JGI_221_v2.1	3.77175	1.58787	1	Gorai.012G095200	___NoMatchedTerm___
Gorai.012G076900-JGI_221_v2.1	4.2336	0.97858	1	Gorai.012G076900	gi|519702996|gb|JX596776.1|_Gossypium_hirsutum_clone_NBRI_GE33500_microsatellite_sequence
Gorai.011G029600-JGI_221_v2.1	3.58908	2.11625	1	Gorai.011G029600	gi|519685803|gb|JX579698.1|_Gossypium_hirsutum_clone_NBRI_GE11990_microsatellite_sequence
Gorai.010G156100-JGI_221_v2.1	3.71034	1.75911	1	Gorai.010G156100	___NoMatchedTerm___
Gorai.010G124600-JGI_221_v2.1	5.7311	0.82407	1	Gorai.010G124600	gi|211906529|gb|FJ415212.1|_Gossypium_hirsutum_clone_ARK1_arabinose_kinase_mRNA,_partial_cds
Gorai.009G396900-JGI_221_v2.1	5.10034	0.738582	1	Gorai.009G396900	gi|519683151|gb|JX577046.1|_Gossypium_hirsutum_clone_NBRI_GE8797_microsatellite_sequence
Gorai.008G220500-JGI_221_v2.1	4.09939	1.13635	1	Gorai.008G220500	___NoMatchedTerm___
Gorai.008G131600-JGI_221_v2.1	5.29879	0.605718	1	Gorai.008G131600	gi|529060934|gb|JX963690.1|_Gossypium_hirsutum_clone_NBRI_TRANS-020_microsatellite_sequence
Gorai.008G092600-JGI_221_v2.1	3.98552	1.03266	1	Gorai.008G092600	gi|519753674|gb|JX618089.1|_Gossypium_hirsutum_clone_NBRI_GE63429_microsatellite_sequence
Gorai.007G332000-JGI_221_v2.1	3.46807	1.78391	1	Gorai.007G332000	gi|283488500|gb|GQ292791.1|_Gossypium_hirsutum_rhamnose_synthase_(RHM2)_mRNA,_complete_cds
Gorai.007G071400-JGI_221_v2.1	3.97903	2.21342	1	Gorai.007G071400	gi|519686132|gb|JX580027.1|_Gossypium_hirsutum_clone_NBRI_GE12381_microsatellite_sequence
Gorai.007G036800-JGI_221_v2.1	3.79274	2.8088	1	Gorai.007G036800	gi|89357196|gb|DQ359121.1|_Gossypium_barbadense_TCP_domain-like_protein_I_mRNA,_complete_cds
Gorai.007G033700-JGI_221_v2.1	3.48446	2.21674	1	Gorai.007G033700	___NoMatchedTerm___
Gorai.007G031700-JGI_221_v2.1	4.4936	0.654145	1	Gorai.007G031700	___NoMatchedTerm___
Gorai.006G168400-JGI_221_v2.1	4.70511	0.998099	1	Gorai.006G168400	gi|56475217|gb|AY685666.1|_Gossypium_arboreum_calmodulin-binding_protein_mRNA,_partial_cds
Gorai.005G018000-JGI_221_v2.1	6.2813	0.287129	1	Gorai.005G018000	gi|317175060|gb|HQ527279.1|_Gossypium_herbaceum_clone_NBRI_B_EYI1BW404JLT6N-2_simple_sequence_repeat_marker,_mRNA_sequence
Gorai.004G292800-JGI_221_v2.1	3.90103	2.27473	1	Gorai.004G292800	gi|110339460|gb|DQ673345.1|_Gossypium_hirsutum_putative_sucrose_phosphate_synthase_mRNA,_partial_cds
Gorai.004G291300-JGI_221_v2.1	3.75664	1.71973	1	Gorai.004G291300	___NoMatchedTerm___
Gorai.004G253100-JGI_221_v2.1	4.14292	0.967805	1	Gorai.004G253100	gi|519691737|gb|JX585632.1|_Gossypium_hirsutum_clone_NBRI_GE19257_microsatellite_sequence
Gorai.004G218700-JGI_221_v2.1	3.5676	1.99964	1	Gorai.004G218700	___NoMatchedTerm___
Gorai.004G167600-JGI_221_v2.1	4.51869	1.64207	1	Gorai.004G167600	gi|256536783|gb|GQ393838.1|_Gossypium_hirsutum_cultivar_Deltapine_33_B_clone_MONCS0803_SSR_marker_CGR5936_genomic_sequence
Gorai.004G154200-JGI_221_v2.1	4.71816	0.749723	1	Gorai.004G154200	___NoMatchedTerm___
Gorai.003G161200-JGI_221_v2.1	3.7311	2.2471	1	Gorai.003G161200	___NoMatchedTerm___
Gorai.003G119900-JGI_221_v2.1	4.5676	1.69959	1	Gorai.003G119900	___NoMatchedTerm___
Gorai.003G074200-JGI_221_v2.1	3.61305	2.36721	1	Gorai.003G074200	gi|312032534|gb|AC243101.1|_Gossypium_arboreum_clone_GM203N05-jhe,_complete_sequence
Gorai.003G015300-JGI_221_v2.1	3.72372	1.31353	1	Gorai.003G015300	gi|529072818|gb|JX964688.1|_Gossypium_hirsutum_clone_NBRI_TRANS-957_microsatellite_sequence
Gorai.002G266500-JGI_221_v2.1	4.61956	3.14775	1	Gorai.002G266500	gi|312032598|gb|AC243166.1|_Gossypium_hirsutum_clone_MX191C03-jop,_complete_sequence
Gorai.002G126000-JGI_221_v2.1	4.69634	1.42414	1	Gorai.002G126000	___NoMatchedTerm___
Gorai.002G006800-JGI_221_v2.1	3.47218	1.84318	1	Gorai.002G006800	___NoMatchedTerm___
Gorai.001G228200-JGI_221_v2.1	3.75664	2.43503	1	Gorai.001G228200	___NoMatchedTerm___
Gorai.001G172800-JGI_221_v2.1	4.44731	0.720782	1	Gorai.001G172800	___NoMatchedTerm___
Gorai.N005300-JGI_221_v2.1	4.05303	1.09406	1	Gorai.N005300	gi|89258490|gb|DQ372570.1|_Gossypium_hirsutum_putative_ribosomal_protein_L28_(rpl28)_mRNA,_complete_cds
Gorai.013G196100-JGI_221_v2.1	3.75664	1.61762	1	Gorai.013G196100	___NoMatchedTerm___
Gorai.012G146400-JGI_221_v2.1	4.09367	1.03266	1	Gorai.012G146400	___NoMatchedTerm___
Gorai.011G227400-JGI_221_v2.1	3.38318	1.81026	1	Gorai.011G227400	gi|519685381|gb|JX579276.1|_Gossypium_hirsutum_clone_NBRI_GE11481_microsatellite_sequence
Gorai.011G210100-JGI_221_v2.1	5.68279	-0.0828206	1	Gorai.011G210100	___NoMatchedTerm___
Gorai.011G195000-JGI_221_v2.1	4.59617	0.530156	1	Gorai.011G195000	gi|519746444|gb|JX614576.1|_Gossypium_hirsutum_clone_NBRI_GE58065_microsatellite_sequence
Gorai.010G186200-JGI_221_v2.1	5.53595	0.765176	1	Gorai.010G186200	gi|319433452|gb|GU451707.1|_Gossypium_hirsutum_copper_binding_protein_9_(BCP9)_mRNA,_complete_cds
Gorai.010G153800-JGI_221_v2.1	4.43154	0.869874	1	Gorai.010G153800	gi|519749339|gb|JX615998.1|_Gossypium_hirsutum_clone_NBRI_GE60331_microsatellite_sequence
Gorai.010G112900-JGI_221_v2.1	6.28319	-0.819786	1	Gorai.010G112900	___NoMatchedTerm___
Gorai.010G047400-JGI_221_v2.1	4.0735	1.40751	1	Gorai.010G047400	___NoMatchedTerm___
Gorai.009G387800-JGI_221_v2.1	5.85788	0.21674	1	Gorai.009G387800	___NoMatchedTerm___
Gorai.009G335200-JGI_221_v2.1	4.09367	1.33222	1	Gorai.009G335200	gi|317173490|gb|HQ525709.1|_Gossypium_herbaceum_clone_NBRI_A_EYI1BW401B21EB_simple_sequence_repeat_marker,_mRNA_sequence
Gorai.009G304300-JGI_221_v2.1	4.61491	1.18466	1	Gorai.009G304300	gi|317175185|gb|HQ527404.1|_Gossypium_herbaceum_clone_NBRI_C_EYT27PB01A95IJ_simple_sequence_repeat_marker,_mRNA_sequence
Gorai.009G174800-JGI_221_v2.1	4.65167	1.39111	1	Gorai.009G174800	gi|519750182|gb|JX616456.1|_Gossypium_hirsutum_clone_NBRI_GE61145_microsatellite_sequence
Gorai.009G142200-JGI_221_v2.1	4.75664	0.5229	1	Gorai.009G142200	gi|519684106|gb|JX578001.1|_Gossypium_hirsutum_clone_NBRI_GE9934_microsatellite_sequence
Gorai.009G131300-JGI_221_v2.1	4.81606	0.736607	1	Gorai.009G131300	gi|529063327|gb|JX964093.1|_Gossypium_hirsutum_clone_NBRI_TRANS-362_microsatellite_sequence
Gorai.009G122000-JGI_221_v2.1	3.53846	1.50214	1	Gorai.009G122000	gi|519695884|gb|JX589779.1|_Gossypium_hirsutum_clone_NBRI_GE24545_microsatellite_sequence
Gorai.009G112500-JGI_221_v2.1	3.31607	1.6672	1	Gorai.009G112500	gi|28916445|gb|AY212968.1|_Gossypium_hirsutum_ser-thr_protein_kinase_mRNA,_partial_cds
Gorai.009G073600-JGI_221_v2.1	4.1332	1.1902	1	Gorai.009G073600	gi|519684697|gb|JX578592.1|_Gossypium_hirsutum_clone_NBRI_GE10643_microsatellite_sequence
Gorai.009G067000-JGI_221_v2.1	5.05053	0.0326566	1	Gorai.009G067000	gi|317175016|gb|HQ527235.1|_Gossypium_herbaceum_clone_NBRI_B_EYI1BW404H5SCU_simple_sequence_repeat_marker,_mRNA_sequence
Gorai.009G017300-JGI_221_v2.1	4.35001	1.45061	1	Gorai.009G017300	___NoMatchedTerm___
Gorai.008G260200-JGI_221_v2.1	3.38318	1.6299	1	Gorai.008G260200	___NoMatchedTerm___
Gorai.008G225000-JGI_221_v2.1	5.89852	-0.415396	1	Gorai.008G225000	gi|312032563|gb|AC243130.1|_Gossypium_raimondii_clone_GR__Ba0240C19-hnz,_complete_sequence
Gorai.008G080700-JGI_221_v2.1	5.20915	0.771329	1	Gorai.008G080700	___NoMatchedTerm___
Gorai.008G013600-JGI_221_v2.1	3.44731	1.76518	1	Gorai.008G013600	___NoMatchedTerm___
Gorai.007G271300-JGI_221_v2.1	5.33314	0.239108	1	Gorai.007G271300	___NoMatchedTerm___
Gorai.007G264000-JGI_221_v2.1	3.67864	1.18021	1	Gorai.007G264000	___NoMatchedTerm___
Gorai.007G205600-JGI_221_v2.1	3.47064	1.46467	1	Gorai.007G205600	gi|256536551|gb|GQ393606.1|_Gossypium_hirsutum_cultivar_Deltapine_33_B_clone_MONCS0571_SSR_marker_CGR5614_genomic_sequence
Gorai.007G157700-JGI_221_v2.1	4.05303	1.55461	1	Gorai.007G157700	gi|519751050|gb|JX616874.1|_Gossypium_hirsutum_clone_NBRI_GE61821_microsatellite_sequence
Gorai.007G040600-JGI_221_v2.1	4.96814	0.0546829	1	Gorai.007G040600	___NoMatchedTerm___
Gorai.006G237200-JGI_221_v2.1	4.24568	1.00833	1	Gorai.006G237200	___NoMatchedTerm___
Gorai.006G138000-JGI_221_v2.1	3.997	0.935558	1	Gorai.006G138000	___NoMatchedTerm___
Gorai.006G135400-JGI_221_v2.1	5.25216	0.0922661	1	Gorai.006G135400	___NoMatchedTerm___
Gorai.005G245300-JGI_221_v2.1	6.014	-0.390943	1	Gorai.005G245300	___NoMatchedTerm___
Gorai.005G129700-JGI_221_v2.1	6.12091	0.239108	1	Gorai.005G129700	gi|519742038|gb|JX613033.1|_Gossypium_hirsutum_clone_NBRI_GE55829_microsatellite_sequence
Gorai.005G049700-JGI_221_v2.1	3.90103	2.1902	1	Gorai.005G049700	gi|45644503|gb|AY560547.1|_Gossypium_barbadense_proline-rich_protein_mRNA,_complete_cds
Gorai.005G031200-JGI_221_v2.1	4.90103	0.487495	1	Gorai.005G031200	gi|529062431|gb|JX963945.1|_Gossypium_hirsutum_clone_NBRI_TRANS-214_microsatellite_sequence
Gorai.004G220200-JGI_221_v2.1	5.93805	-0.162991	1	Gorai.004G220200	gi|519682986|gb|JX576881.1|_Gossypium_hirsutum_clone_NBRI_GE8602_microsatellite_sequence
Gorai.002G264100-JGI_221_v2.1	5.81606	0.460322	1	Gorai.002G264100	___NoMatchedTerm___
Gorai.002G133900-JGI_221_v2.1	4.20915	1.56488	1	Gorai.002G133900	___NoMatchedTerm___
Gorai.001G145400-JGI_221_v2.1	3.5676	2.68271	1	Gorai.001G145400	___NoMatchedTerm___
Gorai.001G096900-JGI_221_v2.1	3.61025	1.28641	1	Gorai.001G096900	gi|519686667|gb|JX580562.1|_Gossypium_hirsutum_clone_NBRI_GE13012_microsatellite_sequence
Gorai.001G081600-JGI_221_v2.1	7.13799	-0.404749	1	Gorai.001G081600	___NoMatchedTerm___
Gorai.N024400-JGI_221_v2.1	3.50871	1.56354	1	Gorai.N024400	___NoMatchedTerm___
Gorai.N024200-JGI_221_v2.1	6.01121	0.130583	1	Gorai.N024200	gi|114795479|gb|DQ908212.1|_Gossypium_hirsutum_clone_LIB5327-021-A1-N1-A11_Gh272_microsatellite_sequence
Gorai.N017100-JGI_221_v2.1	6.2636	1.44325	1	Gorai.N017100	___NoMatchedTerm___
Gorai.N014100-JGI_221_v2.1	4.74393	1.97163	1	Gorai.N014100	___NoMatchedTerm___
Gorai.013G256800-JGI_221_v2.1	4.32747	1.91718	1	Gorai.013G256800	gi|529062022|gb|JX963876.1|_Gossypium_hirsutum_clone_NBRI_TRANS-145_microsatellite_sequence
Gorai.013G254600-JGI_221_v2.1	6.89852	1.69479	1	Gorai.013G254600	gi|317175757|gb|HQ527976.1|_Gossypium_herbaceum_clone_NBRI_E_EYT27PB03FQYO1_simple_sequence_repeat_marker,_mRNA_sequence
Gorai.013G254400-JGI_221_v2.1	6.29444	1.86655	1	Gorai.013G254400	gi|529067002|gb|JX964272.1|_Gossypium_hirsutum_clone_NBRI_TRANS-541_microsatellite_sequence
Gorai.013G205800-JGI_221_v2.1	4.7311	1.72453	1	Gorai.013G205800	___NoMatchedTerm___
Gorai.013G196000-JGI_221_v2.1	5.74393	3.13096	1	Gorai.013G196000	___NoMatchedTerm___
Gorai.013G194900-JGI_221_v2.1	3.5676	1.6299	1	Gorai.013G194900	___NoMatchedTerm___
Gorai.013G170300-JGI_221_v2.1	7.03238	2.43175	1	Gorai.013G170300	gi|383932359|gb|JQ837708.1|_Gossypium_hirsutum_cultivar_ZM3_hypothetical_protein_mRNA,_complete_cds
Gorai.013G140900-JGI_221_v2.1	8.31356	2.22623	1	Gorai.013G140900	gi|129771232|gb|EF453641.1|_Gossypium_hirsutum_clone_Ghf_DEG11_sucrose_transporter_1_mRNA,_partial_cds
Gorai.013G137000-JGI_221_v2.1	4.85449	2.45323	1	Gorai.013G137000	gi|519684896|gb|JX578791.1|_Gossypium_hirsutum_clone_NBRI_GE10884_microsatellite_sequence
Gorai.013G131000-JGI_221_v2.1	8.93805	1.34686	1	Gorai.013G131000	gi|29028257|gb|AY217756.1|_Gossypium_hirsutum_ADP-ribosylation_factor_1_(ARF1)_mRNA,_complete_cds
Gorai.013G100300-JGI_221_v2.1	4.2813	2.89118	1	Gorai.013G100300	___NoMatchedTerm___
Gorai.013G090300-JGI_221_v2.1	4.17168	0.998099	1	Gorai.013G090300	___NoMatchedTerm___
Gorai.013G081600-JGI_221_v2.1	3.87794	1.81026	1	Gorai.013G081600	___NoMatchedTerm___
Gorai.013G061500-JGI_221_v2.1	3.95717	2.9528	1	Gorai.013G061500	___NoMatchedTerm___
Gorai.012G182000-JGI_221_v2.1	3.84261	1.97303	1	Gorai.012G182000	___NoMatchedTerm___
Gorai.012G181700-JGI_221_v2.1	4.75664	1.26295	1	Gorai.012G181700	gi|519691436|gb|JX585331.1|_Gossypium_hirsutum_clone_NBRI_GE18864_microsatellite_sequence
Gorai.012G088500-JGI_221_v2.1	7.63549	0.463668	1	Gorai.012G088500	___NoMatchedTerm___
Gorai.012G046100-JGI_221_v2.1	8.64149	1.16266	1	Gorai.012G046100	gi|519688418|gb|JX582313.1|_Gossypium_hirsutum_clone_NBRI_GE15126_microsatellite_sequence
Gorai.012G002600-JGI_221_v2.1	4.03227	2.65968	1	Gorai.012G002600	___NoMatchedTerm___
Gorai.011G295700-JGI_221_v2.1	4.2813	3.20996	1	Gorai.011G295700	gi|519713003|gb|JX604301.1|_Gossypium_hirsutum_clone_NBRI_GE43513_microsatellite_sequence
Gorai.011G240600-JGI_221_v2.1	4.50871	1.61515	1	Gorai.011G240600	___NoMatchedTerm___
Gorai.011G238500-JGI_221_v2.1	3.96814	1.8017	1	Gorai.011G238500	gi|519725484|gb|JX609548.1|_Gossypium_hirsutum_clone_NBRI_GE50839_microsatellite_sequence
Gorai.011G186700-JGI_221_v2.1	4.58196	1.67902	1	Gorai.011G186700	gi|519692736|gb|JX586631.1|_Gossypium_hirsutum_clone_NBRI_GE20493_microsatellite_sequence
Gorai.011G185400-JGI_221_v2.1	5.81606	0.952803	1	Gorai.011G185400	___NoMatchedTerm___
Gorai.011G171200-JGI_221_v2.1	5.03227	2.43503	1	Gorai.011G171200	___NoMatchedTerm___
Gorai.011G116900-JGI_221_v2.1	4.09367	2.52599	1	Gorai.011G116900	gi|317173159|gb|HQ525378.1|_Gossypium_herbaceum_clone_NBRI_C_EYT27PB01CBAMC_simple_sequence_repeat_marker,_mRNA_sequence
Gorai.011G067000-JGI_221_v2.1	5.2636	2.29569	1	Gorai.011G067000	gi|519749930|gb|JX616330.1|_Gossypium_hirsutum_clone_NBRI_GE60902_microsatellite_sequence
Gorai.011G053500-JGI_221_v2.1	3.50871	2.23911	1	Gorai.011G053500	___NoMatchedTerm___
Gorai.011G020200-JGI_221_v2.1	4.17168	1.70568	1	Gorai.011G020200	gi|124488471|gb|EF217318.1|_Gossypium_hirsutum_clone_BR1_benzoquinone_reductase_mRNA,_complete_cds
Gorai.011G006300-JGI_221_v2.1	4.39948	1.36784	1	Gorai.011G006300	gi|211906523|gb|FJ415209.1|_Gossypium_hirsutum_clone_UXE1_UDP-D-xylose_4-epimerase_mRNA,_complete_cds
Gorai.010G253900-JGI_221_v2.1	4.46291	1.91718	1	Gorai.010G253900	___NoMatchedTerm___
Gorai.010G193000-JGI_221_v2.1	5.5676	3.06557	1	Gorai.010G193000	gi|317175036|gb|HQ527255.1|_Gossypium_herbaceum_clone_NBRI_B2_957_simple_sequence_repeat_marker,_mRNA_sequence
Gorai.010G174000-JGI_221_v2.1	4.78173	1.48422	1	Gorai.010G174000	___NoMatchedTerm___
Gorai.010G116500-JGI_221_v2.1	4.3416	2.3709	1	Gorai.010G116500	___NoMatchedTerm___
Gorai.010G116200-JGI_221_v2.1	7.17154	0.917179	1	Gorai.010G116200	___NoMatchedTerm___
Gorai.010G094800-JGI_221_v2.1	4.52861	2.66313	1	Gorai.010G094800	gi|354718777|gb|HQ542307.1|_Gossypium_barbadense_PME3_mRNA,_complete_cds
Gorai.010G091800-JGI_221_v2.1	4.49664	2.95821	1	Gorai.010G091800	gi|341579416|gb|JN376126.1|_Gossypium_hirsutum_cultivar_Coker_315_sucrose_synthase_isoform_C_mRNA,_complete_cds
Gorai.010G089800-JGI_221_v2.1	5.93805	1.31573	1	Gorai.010G089800	gi|519682954|gb|JX576849.1|_Gossypium_hirsutum_clone_NBRI_GE8559_microsatellite_sequence
Gorai.010G073100-JGI_221_v2.1	4.20915	1.03266	1	Gorai.010G073100	gi|315419008|gb|HM462002.1|_Gossypium_hirsutum_MFP_mRNA,_complete_cds
Gorai.010G064400-JGI_221_v2.1	5.97652	1.79165	1	Gorai.010G064400	___NoMatchedTerm___
Gorai.010G048300-JGI_221_v2.1	3.64257	2.28283	1	Gorai.010G048300	___NoMatchedTerm___
Gorai.010G023800-JGI_221_v2.1	5.01121	1.91718	1	Gorai.010G023800	gi|126256294|gb|EF419428.1|_Gossypium_hirsutum_F-box_protein_(FB2)_mRNA,_complete_cds
Gorai.010G012500-JGI_221_v2.1	3.85449	2.34039	1	Gorai.010G012500	gi|388548523|gb|JQ040262.1|_Gossypium_hirsutum_C3HC4_transcription_factor_mRNA,_complete_cds
Gorai.010G001700-JGI_221_v2.1	7.13799	1.95982	1	Gorai.010G001700	gi|317175288|gb|HQ527507.1|_Gossypium_herbaceum_clone_NBRI_B2_1508_simple_sequence_repeat_marker,_mRNA_sequence
Gorai.009G373000-JGI_221_v2.1	7.78388	2.36888	1	Gorai.009G373000	gi|529066082|gb|JX964129.1|_Gossypium_hirsutum_clone_NBRI_TRANS-398_microsatellite_sequence
Gorai.009G339300-JGI_221_v2.1	5.87406	2.89293	1	Gorai.009G339300	gi|347466187|gb|JF795276.1|_Gossypium_hirsutum_chalcone_synthase_(CHS6)_mRNA,_complete_cds
Gorai.009G292500-JGI_221_v2.1	4.7311	1.75212	1	Gorai.009G292500	___NoMatchedTerm___
Gorai.009G194100-JGI_221_v2.1	4.78173	2.91718	1	Gorai.009G194100	gi|312032586|gb|AC243154.1|_Gossypium_hirsutum_clone_MX113L18-jho,_complete_sequence
Gorai.009G188300-JGI_221_v2.1	3.65167	1.67723	1	Gorai.009G188300	___NoMatchedTerm___
Gorai.009G053900-JGI_221_v2.1	4.90103	2.13017	1	Gorai.009G053900	___NoMatchedTerm___
Gorai.009G020600-JGI_221_v2.1	4.2813	1.12868	1	Gorai.009G020600	___NoMatchedTerm___
Gorai.009G020500-JGI_221_v2.1	5.78173	3.33222	1	Gorai.009G020500	gi|519746509|gb|JX614617.1|_Gossypium_hirsutum_clone_NBRI_GE58146_microsatellite_sequence
Gorai.009G000600-JGI_221_v2.1	7.62341	1.6877	1	Gorai.009G000600	___NoMatchedTerm___
Gorai.008G293500-JGI_221_v2.1	5.0735	1.93425	1	Gorai.008G293500	___NoMatchedTerm___
Gorai.008G236800-JGI_221_v2.1	6.70588	1.35775	1	Gorai.008G236800	gi|519685365|gb|JX579260.1|_Gossypium_hirsutum_clone_NBRI_GE11463_microsatellite_sequence
Gorai.008G160000-JGI_221_v2.1	6.48348	0.0732986	1	Gorai.008G160000	___NoMatchedTerm___
Gorai.008G147800-JGI_221_v2.1	6.09367	1.50214	1	Gorai.008G147800	___NoMatchedTerm___
Gorai.008G122000-JGI_221_v2.1	4.71383	1.74209	1	Gorai.008G122000	gi|519699278|gb|JX593173.1|_Gossypium_hirsutum_clone_NBRI_GE28783_microsatellite_sequence
Gorai.008G121400-JGI_221_v2.1	3.31607	1.59525	1	Gorai.008G121400	gi|519755068|gb|JX618793.1|_Gossypium_hirsutum_clone_NBRI_GE64424_microsatellite_sequence
Gorai.008G057800-JGI_221_v2.1	7.44284	1.34344	1	Gorai.008G057800	gi|317174985|gb|HQ527204.1|_Gossypium_herbaceum_clone_NBRI_C_3566_simple_sequence_repeat_marker,_mRNA_sequence
Gorai.008G028800-JGI_221_v2.1	4.94612	0.418078	1	Gorai.008G028800	___NoMatchedTerm___
Gorai.008G016000-JGI_221_v2.1	3.9535	2.43503	1	Gorai.008G016000	gi|211906457|gb|FJ415176.1|_Gossypium_hirsutum_clone_Spot39_2-nitropropane_dioxygenase_mRNA,_complete_cds
Gorai.007G342000-JGI_221_v2.1	5.47834	1.0871	1	Gorai.007G342000	gi|519745887|gb|JX614368.1|_Gossypium_hirsutum_clone_NBRI_GE57693_microsatellite_sequence
Gorai.007G293100-JGI_221_v2.1	5.01121	0.447694	1	Gorai.007G293100	gi|29836550|gb|AY117103.1|_Gossypium_barbadense_D-subgenome_putative_sugar_transporter_gene,_partial_cds
Gorai.007G249200-JGI_221_v2.1	4.69193	2.32435	1	Gorai.007G249200	___NoMatchedTerm___
Gorai.007G184400-JGI_221_v2.1	6.42904	0.46972	1	Gorai.007G184400	gi|519683485|gb|JX577380.1|_Gossypium_hirsutum_clone_NBRI_GE9194_microsatellite_sequence
Gorai.007G150000-JGI_221_v2.1	3.46807	2.41194	1	Gorai.007G150000	gi|332167932|gb|HQ452484.1|_Gossypium_hirsutum_auxin-responsive_protein_(Aux4)_mRNA,_complete_cds
Gorai.007G141100-JGI_221_v2.1	4.17168	2.82407	1	Gorai.007G141100	gi|226358405|gb|FJ797562.1|_Gossypium_hirsutum_unknown_mRNA
Gorai.007G079200-JGI_221_v2.1	6.08615	1.20669	1	Gorai.007G079200	gi|519684095|gb|JX577990.1|_Gossypium_hirsutum_clone_NBRI_GE9921_microsatellite_sequence
Gorai.007G078100-JGI_221_v2.1	3.83064	1.64836	1	Gorai.007G078100	___NoMatchedTerm___
Gorai.007G052800-JGI_221_v2.1	6.79469	0.531889	1	Gorai.007G052800	___NoMatchedTerm___
Gorai.007G035900-JGI_221_v2.1	3.80639	1.58276	1	Gorai.007G035900	gi|519683451|gb|JX577346.1|_Gossypium_hirsutum_clone_NBRI_GE9150_microsatellite_sequence
Gorai.007G033800-JGI_221_v2.1	5.50871	2.0935	1	Gorai.007G033800	gi|519685232|gb|JX579127.1|_Gossypium_hirsutum_clone_NBRI_GE11309_microsatellite_sequence
Gorai.007G031000-JGI_221_v2.1	3.92375	2.14325	1	Gorai.007G031000	gi|519683544|gb|JX577439.1|_Gossypium_hirsutum_clone_NBRI_GE9261_microsatellite_sequence
Gorai.006G205900-JGI_221_v2.1	6.40102	0.736607	1	Gorai.006G205900	gi|312032573|gb|AC243140.1|_Gossypium_hirsutum_clone_MX034O24-joj,_complete_sequence
Gorai.006G196300-JGI_221_v2.1	6.77299	1.40751	1	Gorai.006G196300	___NoMatchedTerm___
Gorai.006G177400-JGI_221_v2.1	4.52366	2.11273	1	Gorai.006G177400	gi|519746405|gb|JX614559.1|_Gossypium_hirsutum_clone_NBRI_GE58038_microsatellite_sequence
Gorai.006G172200-JGI_221_v2.1	6.15257	1.70244	1	Gorai.006G172200	gi|529062699|gb|JX963990.1|_Gossypium_hirsutum_clone_NBRI_TRANS-259_microsatellite_sequence
Gorai.006G136400-JGI_221_v2.1	3.95937	2.20575	1	Gorai.006G136400	gi|519765075|gb|JX623040.1|_Gossypium_hirsutum_clone_NBRI_GE70037_microsatellite_sequence
Gorai.006G130200-JGI_221_v2.1	7.22045	1.23084	1	Gorai.006G130200	gi|519683211|gb|JX577106.1|_Gossypium_hirsutum_clone_NBRI_GE8867_microsatellite_sequence
Gorai.005G200600-JGI_221_v2.1	3.53846	1.60524	1	Gorai.005G200600	___NoMatchedTerm___
Gorai.005G195900-JGI_221_v2.1	4.80639	2.54945	1	Gorai.005G195900	gi|312032581|gb|AC243149.1|_Gossypium_hirsutum_clone_MX089E03-jhm,_complete_sequence
Gorai.005G135400-JGI_221_v2.1	3.5676	2.17352	1	Gorai.005G135400	___NoMatchedTerm___
Gorai.005G074900-JGI_221_v2.1	5.2813	3.58556	1	Gorai.005G074900	___NoMatchedTerm___
Gorai.005G057600-JGI_221_v2.1	4.35001	1.88241	1	Gorai.005G057600	___NoMatchedTerm___
Gorai.005G034200-JGI_221_v2.1	7.31356	0.621195	1	Gorai.005G034200	gi|312032569|gb|AC243136.1|_Gossypium_hirsutum_clone_MX024H02-jor,_complete_sequence
Gorai.005G007100-JGI_221_v2.1	3.5676	2.03266	1	Gorai.005G007100	___NoMatchedTerm___
Gorai.004G275600-JGI_221_v2.1	6.69193	1.03917	1	Gorai.004G275600	gi|383932353|gb|JQ837705.1|_Gossypium_hirsutum_cultivar_ZM3_proline-rich_protein_mRNA,_complete_cds
Gorai.004G271000-JGI_221_v2.1	5.91243	1.54167	1	Gorai.004G271000	gi|519690391|gb|JX584286.1|_Gossypium_hirsutum_clone_NBRI_GE17554_microsatellite_sequence
Gorai.004G219100-JGI_221_v2.1	4.83064	2.65415	1	Gorai.004G219100	gi|156066429|gb|EF552432.1|_Gossypium_barbadense_cultivar_Pima_90-53_homogalacturonan_alpha-1,4-galacturonosyltransferase_(GAUT1)_mRNA,_partial_cds
Gorai.004G210200-JGI_221_v2.1	7.71728	0.502142	1	Gorai.004G210200	___NoMatchedTerm___
Gorai.004G208500-JGI_221_v2.1	5.22753	1.77778	1	Gorai.004G208500	___NoMatchedTerm___
Gorai.004G187300-JGI_221_v2.1	4.2813	1.41099	1	Gorai.004G187300	___NoMatchedTerm___
Gorai.004G166400-JGI_221_v2.1	6.50996	0.402606	1	Gorai.004G166400	___NoMatchedTerm___
Gorai.004G135200-JGI_221_v2.1	3.31607	1.67461	1	Gorai.004G135200	gi|317174287|gb|HQ526506.1|_Gossypium_herbaceum_clone_NBRI_C_EYT27PB01B4A7F_simple_sequence_repeat_marker,_mRNA_sequence
Gorai.004G075900-JGI_221_v2.1	3.87794	1.5629	1	Gorai.004G075900	___NoMatchedTerm___
Gorai.004G074700-JGI_221_v2.1	5.15257	1.30184	1	Gorai.004G074700	___NoMatchedTerm___
Gorai.004G074100-JGI_221_v2.1	4.38318	2.72453	1	Gorai.004G074100	___NoMatchedTerm___
Gorai.004G015800-JGI_221_v2.1	3.96814	1.97029	1	Gorai.004G015800	___NoMatchedTerm___
Gorai.004G012200-JGI_221_v2.1	4.43154	1.82407	1	Gorai.004G012200	gi|529069429|gb|JX964549.1|_Gossypium_hirsutum_clone_NBRI_TRANS-818_microsatellite_sequence
Gorai.003G177200-JGI_221_v2.1	3.48853	2.09938	1	Gorai.003G177200	___NoMatchedTerm___
Gorai.003G155600-JGI_221_v2.1	5.37496	1.2651	1	Gorai.003G155600	___NoMatchedTerm___
Gorai.003G155300-JGI_221_v2.1	3.62419	2.72453	1	Gorai.003G155300	___NoMatchedTerm___
Gorai.003G139900-JGI_221_v2.1	3.66071	2.9351	1	Gorai.003G139900	gi|297748118|gb|FJ966892.1|_Gossypium_hirsutum_mitogen-activated_protein_kinase_3_(MPK3)_mRNA,_complete_cds
Gorai.003G086300-JGI_221_v2.1	6.79469	1.69479	1	Gorai.003G086300	___NoMatchedTerm___
Gorai.003G052900-JGI_221_v2.1	6.65933	0.890212	1	Gorai.003G052900	___NoMatchedTerm___
Gorai.003G032500-JGI_221_v2.1	4.33314	2.22169	1	Gorai.003G032500	gi|317174906|gb|HQ527125.1|_Gossypium_herbaceum_clone_NBRI_E_EYT27PB03FZ6HV_simple_sequence_repeat_marker,_mRNA_sequence
Gorai.002G249700-JGI_221_v2.1	5.23663	2.14891	1	Gorai.002G249700	___NoMatchedTerm___
Gorai.002G237800-JGI_221_v2.1	4.7311	1.15422	1	Gorai.002G237800	gi|519691029|gb|JX584924.1|_Gossypium_hirsutum_clone_NBRI_GE18349_microsatellite_sequence
Gorai.002G229800-JGI_221_v2.1	5.58658	0.669252	1	Gorai.002G229800	___NoMatchedTerm___
Gorai.002G208800-JGI_221_v2.1	4.83064	3.1902	1	Gorai.002G208800	gi|19698449|gb|AF485267.1|_Gossypium_hirsutum_class_III_peroxidase_(pod5)_mRNA,_complete_cds
Gorai.002G179000-JGI_221_v2.1	5.2336	2.5229	1	Gorai.002G179000	gi|519749547|gb|JX616123.1|_Gossypium_hirsutum_clone_NBRI_GE60544_microsatellite_sequence
Gorai.002G060900-JGI_221_v2.1	4.50118	1.71514	1	Gorai.002G060900	gi|519696594|gb|JX590489.1|_Gossypium_hirsutum_clone_NBRI_GE25410_microsatellite_sequence
Gorai.002G024700-JGI_221_v2.1	5.36669	2.76153	1	Gorai.002G024700	___NoMatchedTerm___
Gorai.002G014500-JGI_221_v2.1	4.62419	2.45323	1	Gorai.002G014500	___NoMatchedTerm___
Gorai.001G270200-JGI_221_v2.1	6.83712	3.3095	1	Gorai.001G270200	gi|519696181|gb|JX590076.1|_Gossypium_hirsutum_clone_NBRI_GE24911_microsatellite_sequence
Gorai.001G263900-JGI_221_v2.1	4.62419	3.00464	2	Gorai.001G263900	___NoMatchedTerm___
Gorai.001G233400-JGI_221_v2.1	4.50871	2.32317	2	Gorai.001G233400	gi|312032546|gb|AC243113.1|_Gossypium_raimondii_clone_GR__Ba0039D03-hoc,_complete_sequence
Gorai.001G232400-JGI_221_v2.1	4.81857	1.86204	2	Gorai.001G232400	gi|317174746|gb|HQ526965.1|_Gossypium_herbaceum_clone_NBRI_D2_183_simple_sequence_repeat_marker,_mRNA_sequence
Gorai.001G194400-JGI_221_v2.1	7.47006	1.97607	2	Gorai.001G194400	___NoMatchedTerm___
Gorai.001G153600-JGI_221_v2.1	3.86235	1.70568	2	Gorai.001G153600	gi|519683758|gb|JX577653.1|_Gossypium_hirsutum_clone_NBRI_GE9517_microsatellite_sequence
Gorai.001G146300-JGI_221_v2.1	3.96814	2.13017	2	Gorai.001G146300	gi|519692803|gb|JX586698.1|_Gossypium_hirsutum_clone_NBRI_GE20580_microsatellite_sequence
Gorai.001G142100-JGI_221_v2.1	5.52366	1.85908	2	Gorai.001G142100	___NoMatchedTerm___
Gorai.001G140200-JGI_221_v2.1	4.5676	2.54945	2	Gorai.001G140200	gi|519687413|gb|JX581308.1|_Gossypium_hirsutum_clone_NBRI_GE13913_microsatellite_sequence
Gorai.001G128800-JGI_221_v2.1	5.24568	1.88803	2	Gorai.001G128800	___NoMatchedTerm___
Gorai.001G096000-JGI_221_v2.1	4.03227	2.14984	2	Gorai.001G096000	___NoMatchedTerm___
Gorai.001G092100-JGI_221_v2.1	6.63549	2.52384	2	Gorai.001G092100	gi|519750960|gb|JX616831.1|_Gossypium_hirsutum_clone_NBRI_GE61755_microsatellite_sequence
Gorai.001G063600-JGI_221_v2.1	5.11357	2.20669	2	Gorai.001G063600	___NoMatchedTerm___
Gorai.001G019600-JGI_221_v2.1	6.48348	1.22203	2	Gorai.001G019600	___NoMatchedTerm___
Gorai.N023100-JGI_221_v2.1	3.7286	1.79165	2	Gorai.N023100	gi|519694399|gb|JX588294.1|_Gossypium_hirsutum_clone_NBRI_GE22679_microsatellite_sequence
Gorai.N004000-JGI_221_v2.1	5.37245	2.29569	2	Gorai.N004000	___NoMatchedTerm___
Gorai.013G223600-JGI_221_v2.1	4.18803	1.50214	2	Gorai.013G223600	___NoMatchedTerm___
Gorai.013G171600-JGI_221_v2.1	3.50871	1.55461	2	Gorai.013G171600	gi|519747950|gb|JX615266.1|_Gossypium_hirsutum_clone_NBRI_GE59170_microsatellite_sequence
Gorai.013G149900-JGI_221_v2.1	3.92375	1.91718	2	Gorai.013G149900	___NoMatchedTerm___
Gorai.013G113000-JGI_221_v2.1	4.31356	2.23911	2	Gorai.013G113000	gi|170674725|gb|EU532408.1|_Gossypium_barbadense_clone_PCT4-29_ISSR_marker_genomic_sequence
Gorai.013G108400-JGI_221_v2.1	5.63549	0.77516	2	Gorai.013G108400	___NoMatchedTerm___
Gorai.013G071100-JGI_221_v2.1	3.7286	2.0871	2	Gorai.013G071100	___NoMatchedTerm___
Gorai.013G070500-JGI_221_v2.1	4.31356	2.15422	2	Gorai.013G070500	___NoMatchedTerm___
Gorai.013G067100-JGI_221_v2.1	4.7286	1.41194	2	Gorai.013G067100	___NoMatchedTerm___
Gorai.013G036400-JGI_221_v2.1	6.87834	-1.01571	2	Gorai.013G036400	gi|170674633|gb|EU532316.1|_Gossypium_barbadense_clone_I11-19_ISSR_marker_genomic_sequence
Gorai.013G014800-JGI_221_v2.1	4.31356	1.82407	2	Gorai.013G014800	___NoMatchedTerm___
Gorai.012G171200-JGI_221_v2.1	4.81606	0.422415	2	Gorai.012G171200	gi|281487780|gb|GU142863.1|_Gossypium_hirsutum_potassium_transporter_(KT)_mRNA,_complete_cds
Gorai.012G146300-JGI_221_v2.1	5.31356	0.791649	2	Gorai.012G146300	___NoMatchedTerm___
Gorai.012G119300-JGI_221_v2.1	4.18803	1.61762	2	Gorai.012G119300	gi|519683056|gb|JX576951.1|_Gossypium_hirsutum_clone_NBRI_GE8680_microsatellite_sequence
Gorai.012G077200-JGI_221_v2.1	4.05053	1.72453	2	Gorai.012G077200	___NoMatchedTerm___
Gorai.012G011200-JGI_221_v2.1	5.85788	0.109824	2	Gorai.012G011200	___NoMatchedTerm___
Gorai.012G000200-JGI_221_v2.1	3.7286	2.23911	2	Gorai.012G000200	___NoMatchedTerm___
Gorai.011G169100-JGI_221_v2.1	5.58658	1.44074	2	Gorai.011G169100	___NoMatchedTerm___
Gorai.011G152200-JGI_221_v2.1	4.05053	1.50214	2	Gorai.011G152200	___NoMatchedTerm___
Gorai.011G136300-JGI_221_v2.1	5.25216	0.740302	2	Gorai.011G136300	___NoMatchedTerm___
Gorai.011G088100-JGI_221_v2.1	4.53595	1.50214	2	Gorai.011G088100	___NoMatchedTerm___
Gorai.011G023600-JGI_221_v2.1	3.7286	2.50214	2	Gorai.011G023600	gi|317175527|gb|HQ527746.1|_Gossypium_herbaceum_clone_NBRI_A2_468_simple_sequence_repeat_marker,_mRNA_sequence
Gorai.011G016300-JGI_221_v2.1	4.7286	1.91718	2	Gorai.011G016300	gi|519691061|gb|JX584956.1|_Gossypium_hirsutum_clone_NBRI_GE18391_microsatellite_sequence
Gorai.010G245900-JGI_221_v2.1	3.53595	1.74725	2	Gorai.010G245900	gi|312032508|gb|AC243075.1|_Gossypium_arboreum_clone_GAH042O12-jly,_complete_sequence
Gorai.010G240700-JGI_221_v2.1	5.53595	0.0326566	2	Gorai.010G240700	___NoMatchedTerm___
Gorai.010G200400-JGI_221_v2.1	5.31356	1.50214	2	Gorai.010G200400	___NoMatchedTerm___
Gorai.010G183300-JGI_221_v2.1	4.18803	0.724534	2	Gorai.010G183300	gi|519688903|gb|JX582798.1|_Gossypium_hirsutum_clone_NBRI_GE15696_microsatellite_sequence
Gorai.010G159400-JGI_221_v2.1	5.81606	2.27473	2	Gorai.010G159400	gi|529066185|gb|JX964146.1|_Gossypium_hirsutum_clone_NBRI_TRANS-415_microsatellite_sequence
Gorai.010G111500-JGI_221_v2.1	5.05053	1.76518	2	Gorai.010G111500	___NoMatchedTerm___
Gorai.010G107900-JGI_221_v2.1	5.37245	1.59525	2	Gorai.010G107900	gi|300793625|tpg|BK007060.1|_TPA_inf:_Gossypium_hirsutum_aquaporin_TIP4;2_mRNA,_complete_cds
Gorai.010G081800-JGI_221_v2.1	6.15486	2.23911	2	Gorai.010G081800	gi|256536184|gb|GQ393239.1|_Gossypium_hirsutum_cultivar_Deltapine_33_B_clone_MONCS0204_SSR_marker_CGR5100_genomic_sequence
Gorai.010G008800-JGI_221_v2.1	4.65167	1.00464	2	Gorai.010G008800	___NoMatchedTerm___
Gorai.009G453300-JGI_221_v2.1	3.7286	1.59525	2	Gorai.009G453300	___NoMatchedTerm___
Gorai.009G339700-JGI_221_v2.1	3.7286	1.33222	2	Gorai.009G339700	___NoMatchedTerm___
Gorai.009G318100-JGI_221_v2.1	4.81606	0.765176	2	Gorai.009G318100	gi|312032575|gb|AC243142.1|_Gossypium_hirsutum_clone_MX048C17-jmq,_complete_sequence
Gorai.009G299900-JGI_221_v2.1	3.53595	2.58014	2	Gorai.009G299900	gi|317173421|gb|HQ525640.1|_Gossypium_herbaceum_clone_NBRI_B2_588_simple_sequence_repeat_marker,_mRNA_sequence
Gorai.009G294100-JGI_221_v2.1	4.31356	3.50214	2	Gorai.009G294100	___NoMatchedTerm___
Gorai.009G260100-JGI_221_v2.1	5.7286	1.96157	2	Gorai.009G260100	gi|20377382|gb|AF351435.1|_Gossypium_hirsutum_clone_JESPR197_microsatellite_sequence
Gorai.009G258600-JGI_221_v2.1	4.63549	1.0871	2	Gorai.009G258600	___NoMatchedTerm___
Gorai.009G250900-JGI_221_v2.1	4.01121	2.13957	2	Gorai.009G250900	gi|347466183|gb|JF795274.1|_Gossypium_hirsutum_chalcone_synthase_(CHS4)_mRNA,_complete_cds
Gorai.009G244600-JGI_221_v2.1	3.31607	1.61762	2	Gorai.009G244600	___NoMatchedTerm___
Gorai.009G237200-JGI_221_v2.1	4.7286	1.40261	2	Gorai.009G237200	gi|519707890|gb|JX601348.1|_Gossypium_hirsutum_clone_NBRI_GE39516_microsatellite_sequence
Gorai.009G194000-JGI_221_v2.1	3.31356	1.65415	2	Gorai.009G194000	gi|312032557|gb|AC243124.1|_Gossypium_raimondii_clone_GR__Ba0150L14-hof,_complete_sequence
Gorai.009G147800-JGI_221_v2.1	5.93805	0.139572	2	Gorai.009G147800	gi|519688279|gb|JX582174.1|_Gossypium_hirsutum_clone_NBRI_GE14955_microsatellite_sequence
Gorai.009G140600-JGI_221_v2.1	4.05053	0.834717	2	Gorai.009G140600	___NoMatchedTerm___
Gorai.009G095100-JGI_221_v2.1	6.71165	1.91718	2	Gorai.009G095100	gi|159138940|gb|EU223835.1|_Gossypium_hirsutum_low_molecular_weight_heat_shock_protein_(LMWHSP4)_mRNA,_complete_cds
Gorai.009G079700-JGI_221_v2.1	4.53595	1.41194	2	Gorai.009G079700	___NoMatchedTerm___
Gorai.009G032900-JGI_221_v2.1	5.63549	0.710729	2	Gorai.009G032900	___NoMatchedTerm___
Gorai.009G031000-JGI_221_v2.1	5.58658	0.682714	2	Gorai.009G031000	___NoMatchedTerm___
Gorai.009G029100-JGI_221_v2.1	4.01121	1.23911	2	Gorai.009G029100	gi|519684779|gb|JX578674.1|_Gossypium_hirsutum_clone_NBRI_GE10746_microsatellite_sequence
Gorai.008G251500-JGI_221_v2.1	5.42904	0.971627	2	Gorai.008G251500	___NoMatchedTerm___
Gorai.008G247400-JGI_221_v2.1	4.42904	1.50214	2	Gorai.008G247400	___NoMatchedTerm___
Gorai.008G230500-JGI_221_v2.1	5.05053	0.917179	2	Gorai.008G230500	gi|519687590|gb|JX581485.1|_Gossypium_hirsutum_clone_NBRI_GE14130_microsatellite_sequence
Gorai.008G220800-JGI_221_v2.1	4.7286	0.682714	2	Gorai.008G220800	___NoMatchedTerm___
Gorai.008G216700-JGI_221_v2.1	5.77299	2.03266	2	Gorai.008G216700	gi|310722810|gb|GU252170.1|_Gossypium_hirsutum_cultivar_TM1_vacuolar_invertase_1_(VacInv1)_gene,_complete_cds
Gorai.008G208600-JGI_221_v2.1	4.05053	2.0871	2	Gorai.008G208600	___NoMatchedTerm___
Gorai.008G200600-JGI_221_v2.1	4.4156	1.85578	2	Gorai.008G200600	gi|312032547|gb|AC243114.1|_Gossypium_raimondii_clone_GR__Ba0041F12-jfm,_complete_sequence
Gorai.008G149200-JGI_221_v2.1	5.85788	2.91718	2	Gorai.008G149200	___NoMatchedTerm___
Gorai.008G148600-JGI_221_v2.1	5.31356	1.37661	2	Gorai.008G148600	___NoMatchedTerm___
Gorai.008G138900-JGI_221_v2.1	4.97652	0.502142	2	Gorai.008G138900	___NoMatchedTerm___
Gorai.008G137000-JGI_221_v2.1	4.89852	1.65415	2	Gorai.008G137000	gi|519683259|gb|JX577154.1|_Gossypium_hirsutum_clone_NBRI_GE8924_microsatellite_sequence
Gorai.008G100000-JGI_221_v2.1	3.89852	2.61762	2	Gorai.008G100000	gi|157273669|gb|EF672644.1|_Gossypium_hirsutum_fasciclin-like_arabinogalactan_protein_18_(FLA18)_mRNA,_complete_cds
Gorai.008G076400-JGI_221_v2.1	5.31356	-0.0828206	2	Gorai.008G076400	___NoMatchedTerm___
Gorai.008G071000-JGI_221_v2.1	4.63549	0.332217	2	Gorai.008G071000	gi|519745730|gb|JX614296.1|_Gossypium_hirsutum_clone_NBRI_GE57574_microsatellite_sequence
Gorai.007G378200-JGI_221_v2.1	3.62419	2.23911	2	Gorai.007G378200	gi|519684012|gb|JX577907.1|_Gossypium_hirsutum_clone_NBRI_GE9817_microsatellite_sequence
Gorai.007G344000-JGI_221_v2.1	3.7286	1.86471	2	Gorai.007G344000	gi|52140133|gb|AY600403.1|_Gossypium_hirsutum_isolate_2_D09_NBS-LRR_resistance_protein-like_gene,_partial_sequence
Gorai.007G341100-JGI_221_v2.1	4.18803	1.65415	2	Gorai.007G341100	___NoMatchedTerm___
Gorai.007G261800-JGI_221_v2.1	4.1332	1.59525	2	Gorai.007G261800	gi|519686744|gb|JX580639.1|_Gossypium_hirsutum_clone_NBRI_GE13103_microsatellite_sequence
Gorai.007G207100-JGI_221_v2.1	3.31607	1.50214	2	Gorai.007G207100	___NoMatchedTerm___
Gorai.007G205800-JGI_221_v2.1	6.05053	0.617619	2	Gorai.007G205800	___NoMatchedTerm___
Gorai.007G204000-JGI_221_v2.1	3.7311	2.3095	2	Gorai.007G204000	gi|529072840|gb|JX964701.1|_Gossypium_hirsutum_clone_NBRI_TRANS-970_microsatellite_sequence
Gorai.007G098000-JGI_221_v2.1	4.1332	2.03266	2	Gorai.007G098000	___NoMatchedTerm___
Gorai.007G093200-JGI_221_v2.1	3.7286	1.79165	2	Gorai.007G093200	___NoMatchedTerm___
Gorai.007G084200-JGI_221_v2.1	4.53595	1.15164	2	Gorai.007G084200	gi|317172902|gb|HQ525121.1|_Gossypium_herbaceum_clone_NBRI_B_5574_simple_sequence_repeat_marker,_mRNA_sequence
Gorai.007G027700-JGI_221_v2.1	5.37245	1.16511	2	Gorai.007G027700	___NoMatchedTerm___
Gorai.006G245200-JGI_221_v2.1	6.18803	1.77516	2	Gorai.006G245200	gi|317172608|gb|HQ524827.1|_Gossypium_herbaceum_clone_NBRI_B_1394_simple_sequence_repeat_marker,_mRNA_sequence
Gorai.006G233500-JGI_221_v2.1	5.31356	1.16511	2	Gorai.006G233500	gi|312032557|gb|AC243124.1|_Gossypium_raimondii_clone_GR__Ba0150L14-hof,_complete_sequence
Gorai.006G200700-JGI_221_v2.1	6.18803	1.0871	2	Gorai.006G200700	___NoMatchedTerm___
Gorai.006G194000-JGI_221_v2.1	3.5676	1.60524	2	Gorai.006G194000	gi|519761723|gb|JX622036.1|_Gossypium_hirsutum_clone_NBRI_GE68686_microsatellite_sequence
Gorai.006G192500-JGI_221_v2.1	6.37245	0.850065	2	Gorai.006G192500	gi|519683516|gb|JX577411.1|_Gossypium_hirsutum_clone_NBRI_GE9229_microsatellite_sequence
Gorai.006G173800-JGI_221_v2.1	4.63549	0.724534	2	Gorai.006G173800	___NoMatchedTerm___
Gorai.006G156200-JGI_221_v2.1	4.97652	0.502142	2	Gorai.006G156200	gi|317173959|gb|HQ526178.1|_Gossypium_herbaceum_clone_NBRI_E_4403_simple_sequence_repeat_marker,_mRNA_sequence
Gorai.006G149200-JGI_221_v2.1	4.63549	0.917179	2	Gorai.006G149200	gi|519688964|gb|JX582859.1|_Gossypium_hirsutum_clone_NBRI_GE15772_microsatellite_sequence
Gorai.006G126600-JGI_221_v2.1	5.31356	1.91718	2	Gorai.006G126600	___NoMatchedTerm___
Gorai.006G076300-JGI_221_v2.1	3.89852	1.72453	2	Gorai.006G076300	___NoMatchedTerm___
Gorai.005G212500-JGI_221_v2.1	4.42904	1.05468	2	Gorai.005G212500	___NoMatchedTerm___
Gorai.005G150600-JGI_221_v2.1	4.31356	3.00464	2	Gorai.005G150600	gi|211906535|gb|FJ415215.1|_Gossypium_hirsutum_clone_Ghpox4_class_III_peroxidase_(POX4)_mRNA,_complete_cds
Gorai.005G037700-JGI_221_v2.1	5.25216	1.91718	2	Gorai.005G037700	gi|519748361|gb|JX615483.1|_Gossypium_hirsutum_clone_NBRI_GE59485_microsatellite_sequence
Gorai.004G233900-JGI_221_v2.1	4.53595	0.995182	2	Gorai.004G233900	gi|519692322|gb|JX586217.1|_Gossypium_hirsutum_clone_NBRI_GE19983_microsatellite_sequence
Gorai.004G203300-JGI_221_v2.1	6.05053	-0.275466	2	Gorai.004G203300	___NoMatchedTerm___
Gorai.004G172600-JGI_221_v2.1	4.81606	0.431753	2	Gorai.004G172600	gi|317172042|gb|HQ524405.1|_Gossypium_herbaceum_clone_NBRI_F003_simple_sequence_repeat_marker,_genomic_sequence
Gorai.004G136000-JGI_221_v2.1	4.5676	0.502142	2	Gorai.004G136000	gi|519696311|gb|JX590206.1|_Gossypium_hirsutum_clone_NBRI_GE25072_microsatellite_sequence
Gorai.004G125100-JGI_221_v2.1	6.28319	1.23911	2	Gorai.004G125100	gi|519702937|gb|JX596717.1|_Gossypium_hirsutum_clone_NBRI_GE33423_microsatellite_sequence
Gorai.004G124700-JGI_221_v2.1	4.7286	1.23911	2	Gorai.004G124700	gi|519692477|gb|JX586372.1|_Gossypium_hirsutum_clone_NBRI_GE20184_microsatellite_sequence
Gorai.004G115400-JGI_221_v2.1	4.63549	2.03266	2	Gorai.004G115400	___NoMatchedTerm___
Gorai.004G094800-JGI_221_v2.1	4.97652	1.01672	2	Gorai.004G094800	___NoMatchedTerm___
Gorai.004G088300-JGI_221_v2.1	5.05053	0.724534	2	Gorai.004G088300	___NoMatchedTerm___
Gorai.004G061300-JGI_221_v2.1	5.85788	2.00464	2	Gorai.004G061300	gi|519687959|gb|JX581854.1|_Gossypium_hirsutum_clone_NBRI_GE14578_microsatellite_sequence
Gorai.004G030600-JGI_221_v2.1	4.05053	2.82407	2	Gorai.004G030600	gi|40022232|gb|AY476737.1|_Gossypium_hirsutum_XET_mRNA,_partial_sequence
Gorai.003G141600-JGI_221_v2.1	3.89852	1.0871	2	Gorai.003G141600	gi|300793597|tpg|BK007052.1|_TPA_inf:_Gossypium_hirsutum_aquaporin_PIP2;10_mRNA,_complete_cds
Gorai.003G122200-JGI_221_v2.1	4.18803	0.917179	2	Gorai.003G122200	___NoMatchedTerm___
Gorai.003G104800-JGI_221_v2.1	5.12091	1.81026	2	Gorai.003G104800	___NoMatchedTerm___
Gorai.003G053900-JGI_221_v2.1	4.42904	1.50214	2	Gorai.003G053900	___NoMatchedTerm___
Gorai.002G233000-JGI_221_v2.1	4.42904	0.545211	2	Gorai.002G233000	gi|519683041|gb|JX576936.1|_Gossypium_hirsutum_clone_NBRI_GE8663_microsatellite_sequence
Gorai.002G214300-JGI_221_v2.1	4.31356	1.79165	2	Gorai.002G214300	___NoMatchedTerm___
Gorai.002G212000-JGI_221_v2.1	3.7286	1.84318	2	Gorai.002G212000	gi|519695807|gb|JX589702.1|_Gossypium_hirsutum_clone_NBRI_GE24450_microsatellite_sequence
Gorai.002G209400-JGI_221_v2.1	4.63549	0.457748	2	Gorai.002G209400	___NoMatchedTerm___
Gorai.002G202300-JGI_221_v2.1	3.87794	2.13957	2	Gorai.002G202300	gi|519695546|gb|JX589441.1|_Gossypium_hirsutum_clone_NBRI_GE24148_microsatellite_sequence
Gorai.002G177200-JGI_221_v2.1	5.63549	0.382843	2	Gorai.002G177200	___NoMatchedTerm___
Gorai.002G174700-JGI_221_v2.1	4.31356	2.3095	2	Gorai.002G174700	___NoMatchedTerm___
Gorai.002G057600-JGI_221_v2.1	4.18803	1.50214	2	Gorai.002G057600	gi|312032542|gb|AC243109.1|_Gossypium_raimondii_clone_GR__Ba0023N14-hoj,_complete_sequence
Gorai.002G035900-JGI_221_v2.1	4.89852	2.1902	2	Gorai.002G035900	___NoMatchedTerm___
Gorai.002G018100-JGI_221_v2.1	3.5676	1.50214	2	Gorai.002G018100	___NoMatchedTerm___
Gorai.001G263700-JGI_221_v2.1	5.42904	0.180214	2	Gorai.001G263700	___NoMatchedTerm___
Gorai.001G244300-JGI_221_v2.1	4.53595	0.724534	2	Gorai.001G244300	___NoMatchedTerm___
Gorai.001G240300-JGI_221_v2.1	5.31356	0.98131	2	Gorai.001G240300	___NoMatchedTerm___
Gorai.001G219400-JGI_221_v2.1	3.89852	1.23911	2	Gorai.001G219400	___NoMatchedTerm___
Gorai.001G208900-JGI_221_v2.1	3.31607	1.50214	2	Gorai.001G208900	___NoMatchedTerm___
Gorai.001G181200-JGI_221_v2.1	5.42904	3.00464	2	Gorai.001G181200	gi|519689124|gb|JX583019.1|_Gossypium_hirsutum_clone_NBRI_GE15968_microsatellite_sequence
Gorai.001G106900-JGI_221_v2.1	4.81606	1.10982	2	Gorai.001G106900	___NoMatchedTerm___
Gorai.001G068700-JGI_221_v2.1	5.25216	0.279749	2	Gorai.001G068700	___NoMatchedTerm___
Gorai.001G057000-JGI_221_v2.1	5.37245	-0.146951	2	Gorai.001G057000	___NoMatchedTerm___
Gorai.001G014400-JGI_221_v2.1	5.05053	2.03266	2	Gorai.001G014400	___NoMatchedTerm___
Gorai.013G159500-JGI_221_v2.1	4.81606	2.91718	2	Gorai.013G159500	___NoMatchedTerm___
Gorai.013G148800-JGI_221_v2.1	3.31356	1.50214	2	Gorai.013G148800	___NoMatchedTerm___
Gorai.013G139100-JGI_221_v2.1	6.31356	2.91718	2	Gorai.013G139100	___NoMatchedTerm___
Gorai.012G121100-JGI_221_v2.1	4.18803	0.917179	2	Gorai.012G121100	___NoMatchedTerm___
Gorai.012G118800-JGI_221_v2.1	4.53595	1.13957	2	Gorai.012G118800	___NoMatchedTerm___
Gorai.012G115400-JGI_221_v2.1	3.53595	2.0871	2	Gorai.012G115400	gi|519685759|gb|JX579654.1|_Gossypium_hirsutum_clone_NBRI_GE11935_microsatellite_sequence
Gorai.012G077800-JGI_221_v2.1	4.31356	1.50214	2	Gorai.012G077800	___NoMatchedTerm___
Gorai.012G020000-JGI_221_v2.1	3.5676	1.72453	2	Gorai.012G020000	gi|519696617|gb|JX590512.1|_Gossypium_hirsutum_clone_NBRI_GE25437_microsatellite_sequence
Gorai.011G246000-JGI_221_v2.1	6.77299	2.31116	2	Gorai.011G246000	___NoMatchedTerm___
Gorai.010G093900-JGI_221_v2.1	5.25216	2.56926	2	Gorai.010G093900	gi|482679617|gb|KC160483.1|_Gossypium_raimondii_clone_Gr10026783_3-ketoacyl-CoA_synthase_8_(KCS8)_gene,_complete_cds
Gorai.009G306800-JGI_221_v2.1	6.25216	3.23911	2	Gorai.009G306800	___NoMatchedTerm___
Gorai.009G196000-JGI_221_v2.1	3.96814	3.0871	2	Gorai.009G196000	___NoMatchedTerm___
Gorai.009G187300-JGI_221_v2.1	5.53595	2.77516	2	Gorai.009G187300	gi|529063426|gb|JX964110.1|_Gossypium_hirsutum_clone_NBRI_TRANS-379_microsatellite_sequence
Gorai.009G106600-JGI_221_v2.1	5.37245	1.91718	2	Gorai.009G106600	gi|519684202|gb|JX578097.1|_Gossypium_hirsutum_clone_NBRI_GE10047_microsatellite_sequence
Gorai.009G082700-JGI_221_v2.1	5.93805	1.72453	2	Gorai.009G082700	gi|317174470|gb|HQ526689.1|_Gossypium_herbaceum_clone_NBRI_B_1357_simple_sequence_repeat_marker,_mRNA_sequence
Gorai.008G217800-JGI_221_v2.1	5.31356	1.91718	2	Gorai.008G217800	gi|312032579|gb|AC243146.1|_Gossypium_hirsutum_clone_MX073K14-jni,_complete_sequence
Gorai.008G172600-JGI_221_v2.1	4.18803	3.0871	2	Gorai.008G172600	___NoMatchedTerm___
Gorai.008G167100-JGI_221_v2.1	5.77299	2.40261	2	Gorai.008G167100	___NoMatchedTerm___
Gorai.008G092800-JGI_221_v2.1	5.31356	3.7262	2	Gorai.008G092800	___NoMatchedTerm___
Gorai.008G037600-JGI_221_v2.1	3.53595	1.33222	2	Gorai.008G037600	___NoMatchedTerm___
Gorai.008G036300-JGI_221_v2.1	4.05053	1.65415	2	Gorai.008G036300	___NoMatchedTerm___
Gorai.007G275100-JGI_221_v2.1	4.97652	2.44074	2	Gorai.007G275100	___NoMatchedTerm___
Gorai.007G213000-JGI_221_v2.1	3.89852	2.67207	2	Gorai.007G213000	___NoMatchedTerm___
Gorai.007G181800-JGI_221_v2.1	5.7286	2.37661	2	Gorai.007G181800	gi|317175504|gb|HQ527723.1|_Gossypium_herbaceum_clone_NBRI_E_EYT27PB03GH9WT_simple_sequence_repeat_marker,_mRNA_sequence
Gorai.007G162800-JGI_221_v2.1	4.63549	2.16511	2	Gorai.007G162800	gi|317172378|gb|HQ524741.1|_Gossypium_herbaceum_clone_NBRI_PD_8_simple_sequence_repeat_marker,_genomic_sequence
Gorai.006G069400-JGI_221_v2.1	3.89852	2.72453	2	Gorai.006G069400	___NoMatchedTerm___
Gorai.005G138800-JGI_221_v2.1	4.53595	2.61762	2	Gorai.005G138800	___NoMatchedTerm___
Gorai.005G044600-JGI_221_v2.1	3.83064	2.82407	2	Gorai.005G044600	gi|519694330|gb|JX588225.1|_Gossypium_hirsutum_clone_NBRI_GE22587_microsatellite_sequence
Gorai.005G041800-JGI_221_v2.1	4.31607	2.23911	2	Gorai.005G041800	___NoMatchedTerm___
Gorai.004G249900-JGI_221_v2.1	5.42904	3.56104	2	Gorai.004G249900	___NoMatchedTerm___
Gorai.004G235000-JGI_221_v2.1	4.18803	2.8047	2	Gorai.004G235000	gi|519683438|gb|JX577333.1|_Gossypium_hirsutum_clone_NBRI_GE9134_microsatellite_sequence
Gorai.004G200800-JGI_221_v2.1	4.05053	1.13957	2	Gorai.004G200800	___NoMatchedTerm___
Gorai.004G019300-JGI_221_v2.1	4.05053	2.23911	2	Gorai.004G019300	gi|256535967|gb|GQ393022.1|_Gossypium_hirsutum_cultivar_Deltapine_20_clone_MONCS0003_SSR_marker_C2-0003_genomic_sequence
Gorai.003G179000-JGI_221_v2.1	4.31356	1.91718	2	Gorai.003G179000	___NoMatchedTerm___
Gorai.003G086600-JGI_221_v2.1	3.7286	1.40261	2	Gorai.003G086600	___NoMatchedTerm___
Gorai.003G076700-JGI_221_v2.1	4.05053	2.03266	2	Gorai.003G076700	gi|519683623|gb|JX577518.1|_Gossypium_hirsutum_clone_NBRI_GE9360_microsatellite_sequence
Gorai.002G264200-JGI_221_v2.1	4.05053	1.72453	2	Gorai.002G264200	gi|519765300|gb|JX623135.1|_Gossypium_hirsutum_clone_NBRI_GE70191_microsatellite_sequence
Gorai.002G221300-JGI_221_v2.1	4.89852	0.765176	2	Gorai.002G221300	gi|153805697|gb|EF643508.1|_Gossypium_hirsutum_nodulin_family_protein_(NLP)_mRNA,_complete_cds
Gorai.002G180300-JGI_221_v2.1	6.42904	0.654145	2	Gorai.002G180300	gi|519689668|gb|JX583563.1|_Gossypium_hirsutum_clone_NBRI_GE16640_microsatellite_sequence
Gorai.002G147100-JGI_221_v2.1	4.18803	2.37661	2	Gorai.002G147100	gi|312032560|gb|AC243127.1|_Gossypium_raimondii_clone_GR__Ba0222F01-hob,_complete_sequence
Gorai.001G257500-JGI_221_v2.1	3.89852	3.37661	2	Gorai.001G257500	gi|317175502|gb|HQ527721.1|_Gossypium_herbaceum_clone_NBRI_D_EYT27PB02DOEXQ_simple_sequence_repeat_marker,_mRNA_sequence
Gorai.001G173000-JGI_221_v2.1	6.53595	2.72453	2	Gorai.001G173000	gi|47499084|gb|AY603789.1|_Gossypium_hirsutum_gibberellin_20-oxidase_(GA20ox1)_mRNA,_complete_cds
Gorai.001G148500-JGI_221_v2.1	6.85788	2.35014	2	Gorai.001G148500	gi|519713212|gb|JX604400.1|_Gossypium_hirsutum_clone_NBRI_GE43645_microsatellite_sequence
Gorai.001G115600-JGI_221_v2.1	4.89852	2.18021	2	Gorai.001G115600	___NoMatchedTerm___
Gorai.001G107900-JGI_221_v2.1	3.7286	2.72453	2	Gorai.001G107900	gi|22531507|emb|AJ459143.1|_Gossypium_hirsutum_partial_myb115c_gene,_clone_pGhMYB115c
Gorai.001G103300-JGI_221_v2.1	5.77299	2.84318	2	Gorai.001G103300	gi|519695868|gb|JX589763.1|_Gossypium_hirsutum_clone_NBRI_GE24525_microsatellite_sequence
Gorai.001G065600-JGI_221_v2.1	4.63549	2.50214	2	Gorai.001G065600	___NoMatchedTerm___
Gorai.N012100-JGI_221_v2.1	3.89852	3.04813	2	Gorai.N012100	___NoMatchedTerm___
Gorai.013G158300-JGI_221_v2.1	3.31356	1.7262	2	Gorai.013G158300	___NoMatchedTerm___
Gorai.013G147000-JGI_221_v2.1	3.7286	1.50214	2	Gorai.013G147000	___NoMatchedTerm___
Gorai.013G070800-JGI_221_v2.1	4.42904	3.04813	2	Gorai.013G070800	___NoMatchedTerm___
Gorai.012G127600-JGI_221_v2.1	3.31356	1.7262	2	Gorai.012G127600	___NoMatchedTerm___
Gorai.012G013900-JGI_221_v2.1	4.05053	3.04813	2	Gorai.012G013900	gi|317175264|gb|HQ527483.1|_Gossypium_herbaceum_clone_NBRI_C_3428_simple_sequence_repeat_marker,_mRNA_sequence
Gorai.012G001700-JGI_221_v2.1	4.05053	1.7262	2	Gorai.012G001700	gi|519687741|gb|JX581636.1|_Gossypium_hirsutum_clone_NBRI_GE14307_microsatellite_sequence
Gorai.011G260200-JGI_221_v2.1	5.97652	2.7262	2	Gorai.011G260200	___NoMatchedTerm___
Gorai.011G171800-JGI_221_v2.1	4.53595	0.917179	2	Gorai.011G171800	___NoMatchedTerm___
Gorai.011G147500-JGI_221_v2.1	4.89852	3.7262	2	Gorai.011G147500	___NoMatchedTerm___
Gorai.011G073800-JGI_221_v2.1	4.42904	1.50214	2	Gorai.011G073800	___NoMatchedTerm___
Gorai.011G066900-JGI_221_v2.1	4.18803	2.23911	2	Gorai.011G066900	___NoMatchedTerm___
Gorai.011G066600-JGI_221_v2.1	3.7286	2.31116	2	Gorai.011G066600	gi|519688349|gb|JX582244.1|_Gossypium_hirsutum_clone_NBRI_GE15040_microsatellite_sequence
Gorai.011G043700-JGI_221_v2.1	3.53595	1.7262	2	Gorai.011G043700	gi|519693463|gb|JX587358.1|_Gossypium_hirsutum_clone_NBRI_GE21427_microsatellite_sequence
Gorai.011G019100-JGI_221_v2.1	4.18803	1.50214	2	Gorai.011G019100	___NoMatchedTerm___
Gorai.011G017700-JGI_221_v2.1	4.18803	2.31116	2	Gorai.011G017700	___NoMatchedTerm___
Gorai.010G108800-JGI_221_v2.1	3.53595	1.91718	2	Gorai.010G108800	___NoMatchedTerm___
Gorai.010G098000-JGI_221_v2.1	3.7286	2.31116	2	Gorai.010G098000	___NoMatchedTerm___
Gorai.010G097900-JGI_221_v2.1	7.014	2.31116	2	Gorai.010G097900	___NoMatchedTerm___
Gorai.010G001300-JGI_221_v2.1	3.53595	2.23911	2	Gorai.010G001300	gi|519692543|gb|JX586438.1|_Gossypium_hirsutum_clone_NBRI_GE20265_microsatellite_sequence
Gorai.009G440100-JGI_221_v2.1	3.53595	1.7262	2	Gorai.009G440100	___NoMatchedTerm___
Gorai.009G392900-JGI_221_v2.1	4.63549	0.726202	2	Gorai.009G392900	___NoMatchedTerm___
Gorai.009G380200-JGI_221_v2.1	4.31356	2.7262	2	Gorai.009G380200	gi|29695319|gb|AY244677.1|_Gossypium_barbadense_clone_32-2_NBS-type_resistance_protein_gene,_partial_cds
Gorai.009G376700-JGI_221_v2.1	3.7286	1.23911	2	Gorai.009G376700	gi|519753942|gb|JX618201.1|_Gossypium_hirsutum_clone_NBRI_GE63588_microsatellite_sequence
Gorai.009G354900-JGI_221_v2.1	3.53595	2.31116	2	Gorai.009G354900	___NoMatchedTerm___
Gorai.009G247300-JGI_221_v2.1	4.42904	1.72453	2	Gorai.009G247300	gi|519746522|gb|JX614623.1|_Gossypium_hirsutum_clone_NBRI_GE58156_microsatellite_sequence
Gorai.009G240100-JGI_221_v2.1	3.89852	2.31116	2	Gorai.009G240100	gi|519685195|gb|JX579090.1|_Gossypium_hirsutum_clone_NBRI_GE11262_microsatellite_sequence
Gorai.009G232400-JGI_221_v2.1	3.7286	1.65415	2	Gorai.009G232400	___NoMatchedTerm___
Gorai.009G162500-JGI_221_v2.1	3.89852	1.50214	2	Gorai.009G162500	gi|519749747|gb|JX616238.1|_Gossypium_hirsutum_clone_NBRI_GE60732_microsatellite_sequence
Gorai.009G162300-JGI_221_v2.1	3.7286	2.50214	2	Gorai.009G162300	___NoMatchedTerm___
Gorai.009G104000-JGI_221_v2.1	3.7286	3.53356	2	Gorai.009G104000	___NoMatchedTerm___
Gorai.009G070200-JGI_221_v2.1	3.7286	2.31116	2	Gorai.009G070200	gi|519686152|gb|JX580047.1|_Gossypium_hirsutum_clone_NBRI_GE12403_microsatellite_sequence
Gorai.009G044300-JGI_221_v2.1	4.97652	3.04813	2	Gorai.009G044300	gi|519746109|gb|JX614459.1|_Gossypium_hirsutum_clone_NBRI_GE57848_microsatellite_sequence
Gorai.009G035000-JGI_221_v2.1	3.7286	1.50214	2	Gorai.009G035000	gi|519686807|gb|JX580702.1|_Gossypium_hirsutum_clone_NBRI_GE13187_microsatellite_sequence
Gorai.009G033100-JGI_221_v2.1	3.7286	2.91718	2	Gorai.009G033100	___NoMatchedTerm___
Gorai.009G023800-JGI_221_v2.1	3.53595	2.7262	2	Gorai.009G023800	___NoMatchedTerm___
Gorai.008G212200-JGI_221_v2.1	3.7286	1.50214	2	Gorai.008G212200	___NoMatchedTerm___
Gorai.008G175900-JGI_221_v2.1	3.7286	1.7262	2	Gorai.008G175900	___NoMatchedTerm___
Gorai.008G164700-JGI_221_v2.1	3.31356	1.50214	2	Gorai.008G164700	gi|519747821|gb|JX615137.1|_Gossypium_hirsutum_clone_NBRI_GE58973_microsatellite_sequence
Gorai.007G349700-JGI_221_v2.1	3.7286	1.50214	2	Gorai.007G349700	___NoMatchedTerm___
Gorai.007G340400-JGI_221_v2.1	3.89852	2.91718	2	Gorai.007G340400	___NoMatchedTerm___
Gorai.007G220300-JGI_221_v2.1	3.31356	1.50214	2	Gorai.007G220300	___NoMatchedTerm___
Gorai.007G198300-JGI_221_v2.1	5.48348	3.31116	2	Gorai.007G198300	___NoMatchedTerm___
Gorai.007G171200-JGI_221_v2.1	3.53595	2.7262	2	Gorai.007G171200	gi|317173090|gb|HQ525309.1|_Gossypium_herbaceum_clone_NBRI_A_EYI1BW401CBKQQ_simple_sequence_repeat_marker,_mRNA_sequence
Gorai.006G248600-JGI_221_v2.1	3.31356	1.7262	2	Gorai.006G248600	___NoMatchedTerm___
Gorai.006G240300-JGI_221_v2.1	3.53595	1.7262	2	Gorai.006G240300	___NoMatchedTerm___
Gorai.006G200200-JGI_221_v2.1	3.7286	3.23911	2	Gorai.006G200200	gi|519693237|gb|JX587132.1|_Gossypium_hirsutum_clone_NBRI_GE21139_microsatellite_sequence
Gorai.006G160300-JGI_221_v2.1	4.53595	3.0871	2	Gorai.006G160300	gi|519682991|gb|JX576886.1|_Gossypium_hirsutum_clone_NBRI_GE8607_microsatellite_sequence
Gorai.006G115600-JGI_221_v2.1	3.89852	3.7262	2	Gorai.006G115600	gi|519747944|gb|JX615260.1|_Gossypium_hirsutum_clone_NBRI_GE59161_microsatellite_sequence
Gorai.006G083700-JGI_221_v2.1	3.7286	3.53356	2	Gorai.006G083700	___NoMatchedTerm___
Gorai.005G068300-JGI_221_v2.1	3.89852	1.7262	2	Gorai.005G068300	___NoMatchedTerm___
Gorai.005G064500-JGI_221_v2.1	4.53595	3.04813	2	Gorai.005G064500	gi|354620274|gb|JF261111.1|_Gossypium_barbadense_VdI2_mRNA,_complete_cds
Gorai.005G024900-JGI_221_v2.1	3.53595	2.31116	2	Gorai.005G024900	___NoMatchedTerm___
Gorai.004G278200-JGI_221_v2.1	3.53595	2.31116	2	Gorai.004G278200	gi|519686166|gb|JX580061.1|_Gossypium_hirsutum_clone_NBRI_GE12421_microsatellite_sequence
Gorai.004G258200-JGI_221_v2.1	3.53595	2.7262	2	Gorai.004G258200	___NoMatchedTerm___
Gorai.004G249000-JGI_221_v2.1	4.42904	2.31116	2	Gorai.004G249000	___NoMatchedTerm___
Gorai.004G072300-JGI_221_v2.1	4.81606	2.31116	2	Gorai.004G072300	___NoMatchedTerm___
Gorai.004G030500-JGI_221_v2.1	3.53595	2.03266	2	Gorai.004G030500	gi|40022232|gb|AY476737.1|_Gossypium_hirsutum_XET_mRNA,_partial_sequence
Gorai.003G131100-JGI_221_v2.1	4.18803	0.917179	2	Gorai.003G131100	___NoMatchedTerm___
Gorai.003G041600-JGI_221_v2.1	3.89852	1.91718	2	Gorai.003G041600	gi|519687789|gb|JX581684.1|_Gossypium_hirsutum_clone_NBRI_GE14367_microsatellite_sequence
Gorai.003G001700-JGI_221_v2.1	4.18803	0.726202	2	Gorai.003G001700	___NoMatchedTerm___
Gorai.002G258700-JGI_221_v2.1	3.53595	1.50214	2	Gorai.002G258700	___NoMatchedTerm___
Gorai.002G258600-JGI_221_v2.1	3.53595	2.72453	2	Gorai.002G258600	___NoMatchedTerm___
Gorai.002G254500-JGI_221_v2.1	3.53595	1.7262	2	Gorai.002G254500	___NoMatchedTerm___
Gorai.002G219500-JGI_221_v2.1	3.89852	2.31116	2	Gorai.002G219500	gi|312032554|gb|AC243121.1|_Gossypium_raimondii_clone_GR__Ba0142D21-hnv,_complete_sequence
Gorai.002G213500-JGI_221_v2.1	4.18803	0.917179	2	Gorai.002G213500	___NoMatchedTerm___
Gorai.002G208900-JGI_221_v2.1	3.7286	2.7262	2	Gorai.002G208900	___NoMatchedTerm___
Gorai.002G194300-JGI_221_v2.1	3.53595	2.31116	2	Gorai.002G194300	___NoMatchedTerm___
Gorai.002G162700-JGI_221_v2.1	4.18803	3.50214	2	Gorai.002G162700	___NoMatchedTerm___
Gorai.002G157000-JGI_221_v2.1	3.7286	1.23911	2	Gorai.002G157000	gi|519745869|gb|JX614360.1|_Gossypium_hirsutum_clone_NBRI_GE57681_microsatellite_sequence
Gorai.001G273200-JGI_221_v2.1	5.25216	0	2	Gorai.001G273200	___NoMatchedTerm___
Gorai.001G262600-JGI_221_v2.1	3.7286	3.31116	2	Gorai.001G262600	gi|529068277|gb|JX964453.1|_Gossypium_hirsutum_clone_NBRI_TRANS-722_microsatellite_sequence
Gorai.001G256300-JGI_221_v2.1	5.63549	1.50214	2	Gorai.001G256300	gi|134035509|gb|EF151309.1|_Gossypium_hirsutum_homeobox_protein_(HB1)_mRNA,_complete_cds
Gorai.001G198600-JGI_221_v2.1	3.31356	1.7262	2	Gorai.001G198600	gi|330370905|gb|JF495686.1|_Gossypium_herbaceum_clone_NBRI_M195_simple_sequence_repeat_marker,_genomic_sequence
Gorai.001G073800-JGI_221_v2.1	4.31356	1.91718	2	Gorai.001G073800	gi|519695734|gb|JX589629.1|_Gossypium_hirsutum_clone_NBRI_GE24365_microsatellite_sequence
Gorai.001G070300-JGI_221_v2.1	3.53595	1.91718	2	Gorai.001G070300	gi|170674557|gb|EU532240.1|_Gossypium_barbadense_clone_I3-3_ISSR_marker_genomic_sequence
Gorai.001G061500-JGI_221_v2.1	4.7286	1.50214	2	Gorai.001G061500	gi|312032554|gb|AC243121.1|_Gossypium_raimondii_clone_GR__Ba0142D21-hnv,_complete_sequence
Gorai.001G048200-JGI_221_v2.1	4.89852	1.7262	2	Gorai.001G048200	gi|586637202|gb|KC847206.1|_Gossypium_hirsutum_NAC_domain_protein_NAC29_mRNA,_complete_cds
Gorai.012G181800-JGI_221_v2.1	5.02557	3.36907	2	Gorai.012G181800	___NoMatchedTerm___
Gorai.012G064000-JGI_221_v2.1	4.84508	3.913	2	Gorai.012G064000	___NoMatchedTerm___
Gorai.011G070000-JGI_221_v2.1	5.38863	3.00825	2	Gorai.011G070000	___NoMatchedTerm___
Gorai.011G035400-JGI_221_v2.1	4.41867	3.43292	2	Gorai.011G035400	___NoMatchedTerm___
Gorai.011G005100-JGI_221_v2.1	4.35206	2.78038	2	Gorai.011G005100	gi|32401252|gb|AF527943.1|_Gossypium_hirsutum_class_VII_chitinase_precursor_(Chia7)_mRNA,_complete_cds
Gorai.010G187700-JGI_221_v2.1	3.66071	2.48704	2	Gorai.010G187700	___NoMatchedTerm___
Gorai.009G413000-JGI_221_v2.1	4.51029	3.06362	2	Gorai.009G413000	gi|227434193|gb|FJ384629.1|_Gossypium_hirsutum_tonoplast_intrinsic_protein_(TIP1;1)_mRNA,_complete_cds
Gorai.009G194500-JGI_221_v2.1	4.46167	3.44648	2	Gorai.009G194500	gi|37529495|gb|AY345608.1|_Gossypium_hirsutum_beta-tubulin_6_mRNA,_complete_cds
Gorai.007G168600-JGI_221_v2.1	6.25705	3.02256	2	Gorai.007G168600	gi|317173678|gb|HQ525897.1|_Gossypium_herbaceum_clone_NBRI_D2_472-1_simple_sequence_repeat_marker,_mRNA_sequence_x0001_gi|317174896|gb|HQ527115.1|_Gossypium_herbaceum_clone_NBRI_D2_472-2_simple_sequence_repeat_marker,_mRNA_sequence
Gorai.007G063600-JGI_221_v2.1	5.70649	2.51444	2	Gorai.007G063600	gi|32186909|gb|AY305734.1|_Gossypium_hirsutum_actin_(ACT13)_mRNA,_complete_cds
Gorai.007G060900-JGI_221_v2.1	4.28302	2.61047	2	Gorai.007G060900	gi|1843526|gb|U73747.1|GHU73747_Gossypium_hirsutum_annexin_(AnnGh2)_mRNA,_partial_cds
Gorai.005G181600-JGI_221_v2.1	3.94167	2.42981	2	Gorai.005G181600	gi|29028257|gb|AY217756.1|_Gossypium_hirsutum_ADP-ribosylation_factor_1_(ARF1)_mRNA,_complete_cds
Gorai.005G134100-JGI_221_v2.1	4.92281	2.96526	2	Gorai.005G134100	gi|32364695|gb|AY255521.1|_Gossypium_hirsutum_ABC_transporter_(WBC1)_mRNA,_complete_cds
Gorai.004G237000-JGI_221_v2.1	4.41628	3.0829	2	Gorai.004G237000	gi|529063022|gb|JX964044.1|_Gossypium_hirsutum_clone_NBRI_TRANS-313_microsatellite_sequence
Gorai.004G134100-JGI_221_v2.1	3.69879	3.48837	2	Gorai.004G134100	gi|317174984|gb|HQ527203.1|_Gossypium_herbaceum_clone_NBRI_C2_345_simple_sequence_repeat_marker,_mRNA_sequence
Gorai.004G117700-JGI_221_v2.1	3.60088	3.10073	2	Gorai.004G117700	___NoMatchedTerm___
Gorai.004G104100-JGI_221_v2.1	3.85852	2.73036	2	Gorai.004G104100	gi|519685758|gb|JX579653.1|_Gossypium_hirsutum_clone_NBRI_GE11934_microsatellite_sequence
Gorai.003G155500-JGI_221_v2.1	4.75302	2.41203	2	Gorai.003G155500	___NoMatchedTerm___
Gorai.003G069800-JGI_221_v2.1	5.18623	3.0135	2	Gorai.003G069800	gi|220978695|gb|FJ560483.1|_Gossypium_hirsutum_actin_1_mRNA,_complete_cds
Gorai.002G218500-JGI_221_v2.1	5.91704	3.35993	2	Gorai.002G218500	gi|482679581|gb|KC160465.1|_Gossypium_raimondii_clone_Gr10031991_3-ketoacyl-CoA_synthase_13_(KCS13)_gene,_complete_cds
Gorai.002G063300-JGI_221_v2.1	3.78854	3.76612	2	Gorai.002G063300	gi|519689060|gb|JX582955.1|_Gossypium_hirsutum_clone_NBRI_GE15888_microsatellite_sequence
Gorai.002G002500-JGI_221_v2.1	4.30033	3.6596	2	Gorai.002G002500	gi|256568422|gb|FJ646596.1|_Gossypium_hirsutum_PIP_protein_(PIP2;5)_mRNA,_complete_cds
Gorai.001G233900-JGI_221_v2.1	4.23567	3.12342	2	Gorai.001G233900	gi|312032546|gb|AC243113.1|_Gossypium_raimondii_clone_GR__Ba0039D03-hoc,_complete_sequence
Gorai.001G219200-JGI_221_v2.1	3.76889	3.56893	2	Gorai.001G219200	___NoMatchedTerm___
Gorai.001G035500-JGI_221_v2.1	3.82516	3.03198	2	Gorai.001G035500	___NoMatchedTerm___
Gorai.N003200-JGI_221_v2.1	4.32974	3.09908	2	Gorai.N003200	___NoMatchedTerm___
Gorai.013G256100-JGI_221_v2.1	3.89003	3.20258	2	Gorai.013G256100	___NoMatchedTerm___
Gorai.013G242200-JGI_221_v2.1	4.26921	4.23226	2	Gorai.013G242200	gi|519708524|gb|JX601982.1|_Gossypium_hirsutum_clone_NBRI_GE40387_microsatellite_sequence
Gorai.013G236000-JGI_221_v2.1	4.35745	3.63766	2	Gorai.013G236000	gi|357601491|gb|JN835293.1|_Gossypium_hirsutum_PAP26_mRNA,_complete_cds
Gorai.013G196800-JGI_221_v2.1	3.9736	4.17554	2	Gorai.013G196800	gi|256535965|gb|GQ393020.1|_Gossypium_hirsutum_cultivar_Deltapine_20_clone_MONCS0001_SSR_marker_C2-0001_genomic_sequence
Gorai.013G161500-JGI_221_v2.1	5.56472	2.86609	2	Gorai.013G161500	___NoMatchedTerm___
Gorai.011G260600-JGI_221_v2.1	3.94144	4.23233	2	Gorai.011G260600	gi|32186911|gb|AY305735.1|_Gossypium_hirsutum_actin_(ACT12)_mRNA,_complete_cds
Gorai.011G065300-JGI_221_v2.1	4.03227	4.09618	2	Gorai.011G065300	gi|317175623|gb|HQ527842.1|_Gossypium_herbaceum_clone_NBRI_C_EYT27PB01BMBRO_simple_sequence_repeat_marker,_mRNA_sequence
Gorai.011G008900-JGI_221_v2.1	5.69634	2.40547	2	Gorai.011G008900	___NoMatchedTerm___
Gorai.010G213400-JGI_221_v2.1	4.27248	3.48764	2	Gorai.010G213400	gi|519690323|gb|JX584218.1|_Gossypium_hirsutum_clone_NBRI_GE17464_microsatellite_sequence
Gorai.010G190100-JGI_221_v2.1	4.76053	2.99454	2	Gorai.010G190100	gi|317174854|gb|HQ527073.1|_Gossypium_herbaceum_clone_NBRI_B2_910_simple_sequence_repeat_marker,_mRNA_sequence
Gorai.010G092900-JGI_221_v2.1	5.05303	2.00032	2	Gorai.010G092900	___NoMatchedTerm___
Gorai.010G060500-JGI_221_v2.1	3.84499	2.98607	2	Gorai.010G060500	gi|519687328|gb|JX581223.1|_Gossypium_hirsutum_clone_NBRI_GE13809_microsatellite_sequence
Gorai.010G024900-JGI_221_v2.1	5.12015	3.52384	2	Gorai.010G024900	___NoMatchedTerm___
Gorai.009G424200-JGI_221_v2.1	4.53425	3.16093	2	Gorai.009G424200	gi|519695826|gb|JX589721.1|_Gossypium_hirsutum_clone_NBRI_GE24472_microsatellite_sequence
Gorai.009G405200-JGI_221_v2.1	4.49178	3.82744	2	Gorai.009G405200	gi|531967536|gb|KC186125.1|_Gossypium_hirsutum_GDSL_esterase/lipase_(GDSL)_mRNA,_complete_cds
Gorai.009G292900-JGI_221_v2.1	4.59617	3.32845	2	Gorai.009G292900	___NoMatchedTerm___
Gorai.009G166700-JGI_221_v2.1	5.1293	2.35158	2	Gorai.009G166700	___NoMatchedTerm___
Gorai.009G125400-JGI_221_v2.1	4.1332	3.12384	2	Gorai.009G125400	___NoMatchedTerm___
Gorai.009G016200-JGI_221_v2.1	3.6697	2.75368	2	Gorai.009G016200	gi|332167940|gb|HQ452489.1|_Gossypium_hirsutum_auxin-responsive_protein_(Aux9)_mRNA,_complete_cds
Gorai.008G293200-JGI_221_v2.1	3.9034	2.74941	2	Gorai.008G293200	gi|317173472|gb|HQ525691.1|_Gossypium_herbaceum_clone_NBRI_B_6361_simple_sequence_repeat_marker,_mRNA_sequence
Gorai.008G222600-JGI_221_v2.1	3.94981	3.2854	2	Gorai.008G222600	___NoMatchedTerm___
Gorai.007G214400-JGI_221_v2.1	5.36337	3.76609	2	Gorai.007G214400	___NoMatchedTerm___
Gorai.007G158400-JGI_221_v2.1	5.14485	3.83684	2	Gorai.007G158400	gi|317174504|gb|HQ526723.1|_Gossypium_herbaceum_clone_NBRI_D_EYT27PB02D17O7_simple_sequence_repeat_marker,_mRNA_sequence
Gorai.007G073900-JGI_221_v2.1	4.25018	3.40995	2	Gorai.007G073900	___NoMatchedTerm___
Gorai.007G041900-JGI_221_v2.1	4.17709	2.64859	2	Gorai.007G041900	gi|211906469|gb|FJ415182.1|_Gossypium_hirsutum_clone_Spot3-10w15_glyceraldehyde-3-phosphate_dehydrogenase_mRNA,_complete_cds
Gorai.006G233600-JGI_221_v2.1	4.14731	3.41902	2	Gorai.006G233600	___NoMatchedTerm___
Gorai.006G219800-JGI_221_v2.1	4.81698	2.59759	2	Gorai.006G219800	___NoMatchedTerm___
Gorai.006G124900-JGI_221_v2.1	5.24937	3.95949	2	Gorai.006G124900	___NoMatchedTerm___
Gorai.006G047300-JGI_221_v2.1	4.41268	2.98607	2	Gorai.006G047300	gi|33355391|gb|AY338495.1|_Gossypium_hirsutum_homeodomain_protein_BNLGHi6313_(bnlghi6313)_mRNA,_complete_cds
Gorai.006G028400-JGI_221_v2.1	3.97903	3.90586	2	Gorai.006G028400	___NoMatchedTerm___
Gorai.006G014300-JGI_221_v2.1	5.36669	3.87834	2	Gorai.006G014300	gi|256536557|gb|GQ393612.1|_Gossypium_hirsutum_cultivar_Deltapine_33_B_clone_MONCS0577_SSR_marker_CGR5626_genomic_sequence
Gorai.005G216400-JGI_221_v2.1	4.88953	3.4882	2	Gorai.005G216400	___NoMatchedTerm___
Gorai.005G197300-JGI_221_v2.1	4.09131	3.51165	2	Gorai.005G197300	___NoMatchedTerm___
Gorai.005G100700-JGI_221_v2.1	4.51704	2.87612	2	Gorai.005G100700	gi|156616813|gb|EF591138.1|_Gossypium_darwinii_D-subgenome_alcohol_dehydrogenase_A_(AdhA)_gene,_5'_UTR
Gorai.004G253200-JGI_221_v2.1	4.27105	3.98592	2	Gorai.004G253200	___NoMatchedTerm___
Gorai.004G191500-JGI_221_v2.1	4.03037	3.04758	2	Gorai.004G191500	___NoMatchedTerm___
Gorai.004G159000-JGI_221_v2.1	3.9535	3.977	2	Gorai.004G159000	___NoMatchedTerm___
Gorai.004G139000-JGI_221_v2.1	5.16079	3.91999	2	Gorai.004G139000	___NoMatchedTerm___
Gorai.004G108900-JGI_221_v2.1	5.39135	2.23593	2	Gorai.004G108900	gi|519708442|gb|JX601900.1|_Gossypium_hirsutum_clone_NBRI_GE40269_microsatellite_sequence
Gorai.003G108200-JGI_221_v2.1	5.23663	3.79247	2	Gorai.003G108200	___NoMatchedTerm___
Gorai.003G080800-JGI_221_v2.1	4.7311	3.40576	2	Gorai.003G080800	gi|67003904|gb|AF538680.2|_Gossypium_hirsutum_endo-1,4-beta-glucanase_(Cel1)_mRNA,_complete_cds
Gorai.003G031100-JGI_221_v2.1	3.5587	2.71765	2	Gorai.003G031100	gi|519686554|gb|JX580449.1|_Gossypium_hirsutum_clone_NBRI_GE12882_microsatellite_sequence
Gorai.003G030700-JGI_221_v2.1	4.2153	3.84689	2	Gorai.003G030700	___NoMatchedTerm___
Gorai.003G001800-JGI_221_v2.1	3.79617	3.41419	2	Gorai.003G001800	gi|529063133|gb|JX964062.1|_Gossypium_hirsutum_clone_NBRI_TRANS-331_microsatellite_sequence
Gorai.002G249400-JGI_221_v2.1	4.66522	3.1503	2	Gorai.002G249400	___NoMatchedTerm___
Gorai.002G126500-JGI_221_v2.1	4.17168	4.00606	2	Gorai.002G126500	___NoMatchedTerm___
Gorai.001G242900-JGI_221_v2.1	4.04269	4.21228	2	Gorai.001G242900	gi|332167930|gb|HQ452482.1|_Gossypium_hirsutum_auxin-responsive_protein_(Aux2)_mRNA,_complete_cds
Gorai.001G229200-JGI_221_v2.1	4.17168	3.55622	2	Gorai.001G229200	gi|519685790|gb|JX579685.1|_Gossypium_hirsutum_clone_NBRI_GE11971_microsatellite_sequence
Gorai.001G186800-JGI_221_v2.1	3.82781	3.34121	2	Gorai.001G186800	gi|519761530|gb|JX621943.1|_Gossypium_hirsutum_clone_NBRI_GE68569_microsatellite_sequence
Gorai.001G111100-JGI_221_v2.1	3.67864	2.07673	2	Gorai.001G111100	gi|345104158|gb|JF722224.1|_Gossypium_barbadense_var._brasiliense_A-genome_expansin_gene,_complete_cds
Gorai.001G053800-JGI_221_v2.1	3.74269	2.71555	2	Gorai.001G053800	gi|17226661|gb|AF443118.1|AF443118_Gossypium_hirsutum_polyphosphoinositide_binding_protein_(Ssh2)_mRNA,_complete_cds
Gorai.013G139900-JGI_221_v2.1	3.68456	2.97607	2	Gorai.013G139900	___NoMatchedTerm___
Gorai.013G226700-JGI_221_v2.1	4.50871	3.46898	2	Gorai.013G226700	gi|519686140|gb|JX580035.1|_Gossypium_hirsutum_clone_NBRI_GE12389_microsatellite_sequence
Gorai.013G225500-JGI_221_v2.1	4.24568	3.13441	2	Gorai.013G225500	___NoMatchedTerm___
Gorai.013G220200-JGI_221_v2.1	5.58196	3.04271	2	Gorai.013G220200	gi|519694601|gb|JX588496.1|_Gossypium_hirsutum_clone_NBRI_GE22938_microsatellite_sequence
Gorai.013G215300-JGI_221_v2.1	4.16215	3.47177	2	Gorai.013G215300	___NoMatchedTerm___
Gorai.013G146100-JGI_221_v2.1	6.43154	3.10786	2	Gorai.013G146100	___NoMatchedTerm___
Gorai.013G035600-JGI_221_v2.1	4.71816	2.06918	2	Gorai.013G035600	___NoMatchedTerm___
Gorai.012G081500-JGI_221_v2.1	4.95717	2.58344	2	Gorai.012G081500	gi|519692310|gb|JX586205.1|_Gossypium_hirsutum_clone_NBRI_GE19969_microsatellite_sequence
Gorai.012G068200-JGI_221_v2.1	4.69985	3.10548	2	Gorai.012G068200	___NoMatchedTerm___
Gorai.011G283300-JGI_221_v2.1	3.61305	2.70974	2	Gorai.011G283300	gi|300793589|tpg|BK007048.1|_TPA_inf:_Gossypium_hirsutum_cultivar_des119_aquaporin_PIP1;7_mRNA,_complete_cds
Gorai.011G282700-JGI_221_v2.1	3.95717	3.10832	2	Gorai.011G282700	gi|519698840|gb|JX592735.1|_Gossypium_hirsutum_clone_NBRI_GE28249_microsatellite_sequence
Gorai.011G072600-JGI_221_v2.1	4.31607	3.11358	2	Gorai.011G072600	___NoMatchedTerm___
Gorai.010G237600-JGI_221_v2.1	4.53846	3.01404	2	Gorai.010G237600	gi|519693876|gb|JX587771.1|_Gossypium_hirsutum_clone_NBRI_GE21984_microsatellite_sequence
Gorai.010G223000-JGI_221_v2.1	3.94612	2.58703	2	Gorai.010G223000	___NoMatchedTerm___
Gorai.010G164500-JGI_221_v2.1	4.39407	3.54028	2	Gorai.010G164500	___NoMatchedTerm___
Gorai.010G035500-JGI_221_v2.1	5.1332	3.298	2	Gorai.010G035500	gi|519750943|gb|JX616821.1|_Gossypium_hirsutum_clone_NBRI_GE61739_microsatellite_sequence
Gorai.009G420200-JGI_221_v2.1	5.25765	2.56627	2	Gorai.009G420200	gi|56475219|gb|AY685667.1|_Gossypium_bickii_calmodulin-binding_protein_mRNA,_partial_cds
Gorai.009G355400-JGI_221_v2.1	7.48348	2.89118	2	Gorai.009G355400	___NoMatchedTerm___
Gorai.009G252800-JGI_221_v2.1	4.12015	3.78508	2	Gorai.009G252800	gi|256537105|gb|GQ394160.1|_Gossypium_hirsutum_cultivar_Deltapine_33_B_clone_MONCS1125_SSR_marker_CGR6706_genomic_sequence
Gorai.009G236000-JGI_221_v2.1	4.97903	3.28641	2	Gorai.009G236000	gi|519690132|gb|JX584027.1|_Gossypium_hirsutum_clone_NBRI_GE17216_microsatellite_sequence
Gorai.009G133700-JGI_221_v2.1	4.33556	3.50736	2	Gorai.009G133700	___NoMatchedTerm___
Gorai.009G106300-JGI_221_v2.1	4.14871	2.98131	2	Gorai.009G106300	gi|519683498|gb|JX577393.1|_Gossypium_hirsutum_clone_NBRI_GE9210_microsatellite_sequence
Gorai.009G016300-JGI_221_v2.1	4.11357	3.15819	2	Gorai.009G016300	___NoMatchedTerm___
Gorai.008G291000-JGI_221_v2.1	5.66522	3.81969	2	Gorai.008G291000	___NoMatchedTerm___
Gorai.008G235400-JGI_221_v2.1	5.85449	3.17771	2	Gorai.008G235400	___NoMatchedTerm___
Gorai.008G173800-JGI_221_v2.1	4.1332	3.12663	2	Gorai.008G173800	gi|312032562|gb|AC243129.1|_Gossypium_raimondii_clone_GR__Ba0233L11-hnw,_complete_sequence
Gorai.008G133400-JGI_221_v2.1	4.36337	4.02047	2	Gorai.008G133400	___NoMatchedTerm___
Gorai.008G020000-JGI_221_v2.1	4.15896	3.74858	2	Gorai.008G020000	___NoMatchedTerm___
Gorai.007G373100-JGI_221_v2.1	4.76505	3.75512	2	Gorai.007G373100	___NoMatchedTerm___
Gorai.007G238500-JGI_221_v2.1	4.00056	3.63828	2	Gorai.007G238500	___NoMatchedTerm___
Gorai.007G223200-JGI_221_v2.1	6.15486	1.74315	2	Gorai.007G223200	gi|519684513|gb|JX578408.1|_Gossypium_hirsutum_clone_NBRI_GE10425_microsatellite_sequence
Gorai.007G067000-JGI_221_v2.1	4.43154	3.20669	2	Gorai.007G067000	gi|519684321|gb|JX578216.1|_Gossypium_hirsutum_clone_NBRI_GE10192_microsatellite_sequence
Gorai.007G003100-JGI_221_v2.1	4.5676	3.15422	2	Gorai.007G003100	___NoMatchedTerm___
Gorai.006G259500-JGI_221_v2.1	3.63524	3.10584	2	Gorai.006G259500	gi|256537986|gb|GQ395041.1|_Gossypium_hirsutum_cultivar_Delta_Opal_clone_MONCS2064_SSR_marker_DPL0530_genomic_sequence
Gorai.006G222600-JGI_221_v2.1	5.44731	2.91718	2	Gorai.006G222600	gi|519746915|gb|JX614788.1|_Gossypium_hirsutum_clone_NBRI_GE58430_microsatellite_sequence
Gorai.006G185900-JGI_221_v2.1	3.78173	3.56104	2	Gorai.006G185900	gi|519697588|gb|JX591483.1|_Gossypium_hirsutum_clone_NBRI_GE26618_microsatellite_sequence
Gorai.006G166600-JGI_221_v2.1	5.79411	3.61762	2	Gorai.006G166600	gi|330370911|gb|JF495692.1|_Gossypium_herbaceum_clone_NBRI_Gh_M201_simple_sequence_repeat_marker,_genomic_sequence
Gorai.006G162700-JGI_221_v2.1	7.28319	2.54945	2	Gorai.006G162700	gi|558605802|gb|KF516996.1|_Gossypium_hirsutum_cultivar_Xinluzao_33_S-adenosylmethionine_synthetase_(SAMS1)_mRNA,_complete_cds
Gorai.006G149500-JGI_221_v2.1	5.32747	3.21893	2	Gorai.006G149500	___NoMatchedTerm___
Gorai.005G230900-JGI_221_v2.1	4.36669	3.65415	2	Gorai.005G230900	gi|480355462|gb|JX290322.1|_Gossypium_hirsutum_lim_protein_6_(LIM6)_mRNA,_complete_cds
Gorai.005G194400-JGI_221_v2.1	4.19053	3.51922	2	Gorai.005G194400	___NoMatchedTerm___
Gorai.005G173900-JGI_221_v2.1	4.26003	3.51844	2	Gorai.005G173900	gi|62956019|gb|AY902467.1|_Gossypium_hirsutum_3-ketoacyl-CoA_reductase_2_mRNA,_complete_cds
Gorai.005G162200-JGI_221_v2.1	4.37908	4.16511	2	Gorai.005G162200	___NoMatchedTerm___
Gorai.005G124900-JGI_221_v2.1	4.2813	2.32317	2	Gorai.005G124900	___NoMatchedTerm___
Gorai.005G084000-JGI_221_v2.1	3.6118	2.84318	2	Gorai.005G084000	gi|319433450|gb|GU451706.1|_Gossypium_hirsutum_copper_binding_protein_8_(BCP8)_mRNA,_complete_cds
Gorai.005G041200-JGI_221_v2.1	4.36115	3.80648	2	Gorai.005G041200	___NoMatchedTerm___
Gorai.004G198200-JGI_221_v2.1	4.24568	3.24487	2	Gorai.004G198200	gi|519685649|gb|JX579544.1|_Gossypium_hirsutum_clone_NBRI_GE11808_microsatellite_sequence
Gorai.004G177800-JGI_221_v2.1	3.67864	3.04056	2	Gorai.004G177800	___NoMatchedTerm___
Gorai.004G139600-JGI_221_v2.1	4.15257	3.27473	2	Gorai.004G139600	___NoMatchedTerm___
Gorai.004G104000-JGI_221_v2.1	6.45652	2.82407	2	Gorai.004G104000	gi|519684919|gb|JX578814.1|_Gossypium_hirsutum_clone_NBRI_GE10916_microsatellite_sequence
Gorai.004G037400-JGI_221_v2.1	3.87794	3.54167	2	Gorai.004G037400	gi|519759052|gb|JX620840.1|_Gossypium_hirsutum_clone_NBRI_GE67189_microsatellite_sequence
Gorai.003G130000-JGI_221_v2.1	3.76505	3.52384	2	Gorai.003G130000	___NoMatchedTerm___
Gorai.003G045800-JGI_221_v2.1	4.76924	2.60168	2	Gorai.003G045800	gi|529062775|gb|JX964003.1|_Gossypium_hirsutum_clone_NBRI_TRANS-272_microsatellite_sequence
Gorai.003G029700-JGI_221_v2.1	4.31607	2.52599	2	Gorai.003G029700	___NoMatchedTerm___
Gorai.002G252300-JGI_221_v2.1	5.32463	3.8047	2	Gorai.002G252300	gi|317174542|gb|HQ526761.1|_Gossypium_herbaceum_clone_NBRI_B_2822_simple_sequence_repeat_marker,_mRNA_sequence
Gorai.002G230000-JGI_221_v2.1	4.53846	3.19814	2	Gorai.002G230000	gi|519693458|gb|JX587353.1|_Gossypium_hirsutum_clone_NBRI_GE21422_microsatellite_sequence
Gorai.002G223000-JGI_221_v2.1	5.05988	3.61762	2	Gorai.002G223000	gi|133902319|gb|EF457754.1|_Gossypium_hirsutum_putative_calcium-binding_protein_gene,_complete_cds;_transposons_gypsy-like_and_GORGE3-likes,_retrotransposon_putative_gypsy,_and_transposons_Mutator-like,_complete_sequence;_alcohol_dehydrogenase_A_gene,_complete_cds;_transposon,_myosin_pseudogene,_and_retrotransposon_putative_gypsy,_complete_sequence;_putative_FAD-dependent_oxidoreductase_and_putat…
Gorai.002G179300-JGI_221_v2.1	5.2813	3.01029	2	Gorai.002G179300	gi|188509935|gb|EU626442.1|_Gossypium_raimondii_clone_BAC_031J10,_complete_sequence
Gorai.002G178500-JGI_221_v2.1	4.09367	3.38595	2	Gorai.002G178500	___NoMatchedTerm___
Gorai.002G103900-JGI_221_v2.1	5.20915	3.13441	2	Gorai.002G103900	gi|519685764|gb|JX579659.1|_Gossypium_hirsutum_clone_NBRI_GE11941_microsatellite_sequence
Gorai.002G100400-JGI_221_v2.1	3.44731	2.36196	2	Gorai.002G100400	___NoMatchedTerm___
Gorai.002G061000-JGI_221_v2.1	5.53846	3.75007	2	Gorai.002G061000	gi|317174797|gb|HQ527016.1|_Gossypium_herbaceum_clone_NBRI_B_4585_simple_sequence_repeat_marker,_mRNA_sequence
Gorai.002G059100-JGI_221_v2.1	3.997	3.8636	2	Gorai.002G059100	___NoMatchedTerm___
Gorai.002G023600-JGI_221_v2.1	4.07755	3.14215	2	Gorai.002G023600	___NoMatchedTerm___
Gorai.002G021300-JGI_221_v2.1	4.78173	3.1691	2	Gorai.002G021300	gi|317172837|gb|HQ525056.1|_Gossypium_herbaceum_clone_NBRI_E_EYT27PB03FYW2W_simple_sequence_repeat_marker,_mRNA_sequence
Gorai.001G218500-JGI_221_v2.1	3.65167	2.65703	2	Gorai.001G218500	gi|383932361|gb|JQ837709.1|_Gossypium_hirsutum_cultivar_ZM3_glycine_rich_protein_mRNA,_complete_cds
Gorai.001G188200-JGI_221_v2.1	6.30745	2.15625	2	Gorai.001G188200	___NoMatchedTerm___
Gorai.001G100100-JGI_221_v2.1	4.69985	4.00849	2	Gorai.001G100100	gi|519684706|gb|JX578601.1|_Gossypium_hirsutum_clone_NBRI_GE10652_microsatellite_sequence
Gorai.001G082600-JGI_221_v2.1	4.35001	3.69479	2	Gorai.001G082600	___NoMatchedTerm___
Gorai.001G077900-JGI_221_v2.1	3.47834	2.35775	2	Gorai.001G077900	___NoMatchedTerm___
Gorai.N019200-JGI_221_v2.1	4.81606	3.16511	2	Gorai.N019200	___NoMatchedTerm___
Gorai.N008700-JGI_221_v2.1	5.05053	3.7262	2	Gorai.N008700	___NoMatchedTerm___
Gorai.N008200-JGI_221_v2.1	3.7286	2.41968	2	Gorai.N008200	___NoMatchedTerm___
Gorai.013G258500-JGI_221_v2.1	4.42904	3.7262	2	Gorai.013G258500	gi|519708339|gb|JX601797.1|_Gossypium_hirsutum_clone_NBRI_GE40134_microsatellite_sequence
Gorai.013G254500-JGI_221_v2.1	6.22045	2.79165	2	Gorai.013G254500	___NoMatchedTerm___
Gorai.013G247200-JGI_221_v2.1	4.42904	3.89613	2	Gorai.013G247200	gi|39652045|emb|AJ567135.1|_Gossypium_hirsutum_microsatellite_DNA_mGhCIR188,_clone_CIR188
Gorai.013G235500-JGI_221_v2.1	5.18803	3.89613	2	Gorai.013G235500	gi|519688103|gb|JX581998.1|_Gossypium_hirsutum_clone_NBRI_GE14759_microsatellite_sequence
Gorai.013G224400-JGI_221_v2.1	4.81606	3.31116	2	Gorai.013G224400	gi|519749040|gb|JX615840.1|_Gossypium_hirsutum_clone_NBRI_GE60074_microsatellite_sequence
Gorai.013G178400-JGI_221_v2.1	4.01121	1.43175	2	Gorai.013G178400	___NoMatchedTerm___
Gorai.013G162400-JGI_221_v2.1	5.42904	1.7262	2	Gorai.013G162400	___NoMatchedTerm___
Gorai.013G099900-JGI_221_v2.1	4.63549	1.7262	2	Gorai.013G099900	___NoMatchedTerm___
Gorai.013G099800-JGI_221_v2.1	5.37245	3.00464	2	Gorai.013G099800	gi|256537743|gb|GQ394798.1|_Gossypium_hirsutum_cultivar_Deltapine_90_clone_MONCS1821_SSR_marker_DC40441_genomic_sequence
Gorai.013G095800-JGI_221_v2.1	5.37245	2.82407	2	Gorai.013G095800	___NoMatchedTerm___
Gorai.013G092900-JGI_221_v2.1	4.89852	3.53356	2	Gorai.013G092900	___NoMatchedTerm___
Gorai.013G086100-JGI_221_v2.1	6.12091	2.65415	2	Gorai.013G086100	gi|519688065|gb|JX581960.1|_Gossypium_hirsutum_clone_NBRI_GE14710_microsatellite_sequence
Gorai.013G032800-JGI_221_v2.1	5.58658	3.72453	2	Gorai.013G032800	___NoMatchedTerm___
Gorai.013G025900-JGI_221_v2.1	4.53595	3.82407	2	Gorai.013G025900	___NoMatchedTerm___
Gorai.013G016900-JGI_221_v2.1	4.53595	2.96157	2	Gorai.013G016900	___NoMatchedTerm___
Gorai.013G011000-JGI_221_v2.1	4.59617	2.76518	2	Gorai.013G011000	gi|519748076|gb|JX615332.1|_Gossypium_hirsutum_clone_NBRI_GE59260_microsatellite_sequence
Gorai.013G009400-JGI_221_v2.1	5.81606	3.50214	2	Gorai.013G009400	___NoMatchedTerm___
Gorai.012G110000-JGI_221_v2.1	4.63549	3.89613	2	Gorai.012G110000	___NoMatchedTerm___
Gorai.012G077000-JGI_221_v2.1	5.05053	2.50214	2	Gorai.012G077000	gi|39652148|emb|AJ567238.1|_Gossypium_hirsutum_microsatellite_DNA_mGhCIR294,_clone_CIR294
Gorai.012G059200-JGI_221_v2.1	5.31356	3.50214	2	Gorai.012G059200	gi|519692709|gb|JX586604.1|_Gossypium_hirsutum_clone_NBRI_GE20457_microsatellite_sequence
Gorai.012G040500-JGI_221_v2.1	5.48348	2.31116	2	Gorai.012G040500	___NoMatchedTerm___
Gorai.012G002700-JGI_221_v2.1	4.05053	3.16511	2	Gorai.012G002700	___NoMatchedTerm___
Gorai.012G001400-JGI_221_v2.1	4.05053	3.72453	2	Gorai.012G001400	___NoMatchedTerm___
Gorai.011G293100-JGI_221_v2.1	3.7286	2.91718	2	Gorai.011G293100	___NoMatchedTerm___
Gorai.011G246500-JGI_221_v2.1	4.18803	1.84318	2	Gorai.011G246500	gi|519696523|gb|JX590418.1|_Gossypium_hirsutum_clone_NBRI_GE25322_microsatellite_sequence
Gorai.011G229000-JGI_221_v2.1	5.25216	3.82407	2	Gorai.011G229000	___NoMatchedTerm___
Gorai.011G220400-JGI_221_v2.1	4.89852	1.91718	2	Gorai.011G220400	___NoMatchedTerm___
Gorai.011G202100-JGI_221_v2.1	4.81606	3.91718	2	Gorai.011G202100	___NoMatchedTerm___
Gorai.011G175600-JGI_221_v2.1	5.12091	3.31116	2	Gorai.011G175600	___NoMatchedTerm___
Gorai.011G113900-JGI_221_v2.1	5.18803	3.37661	2	Gorai.011G113900	___NoMatchedTerm___
Gorai.011G100700-JGI_221_v2.1	6.48348	1.87654	2	Gorai.011G100700	gi|317174478|gb|HQ526697.1|_Gossypium_herbaceum_clone_NBRI_B_EYI1BW404JO2UJ_simple_sequence_repeat_marker,_mRNA_sequence
Gorai.011G080100-JGI_221_v2.1	4.7286	2.56104	2	Gorai.011G080100	gi|519685024|gb|JX578919.1|_Gossypium_hirsutum_clone_NBRI_GE11048_microsatellite_sequence
Gorai.011G000900-JGI_221_v2.1	4.97652	3.61762	2	Gorai.011G000900	gi|519686181|gb|JX580076.1|_Gossypium_hirsutum_clone_NBRI_GE12438_microsatellite_sequence
Gorai.010G243000-JGI_221_v2.1	3.89852	2.72453	2	Gorai.010G243000	___NoMatchedTerm___
Gorai.010G218100-JGI_221_v2.1	5.25216	3.04813	2	Gorai.010G218100	___NoMatchedTerm___
Gorai.010G182100-JGI_221_v2.1	4.7286	3.37661	2	Gorai.010G182100	gi|519691474|gb|JX585369.1|_Gossypium_hirsutum_clone_NBRI_GE18910_microsatellite_sequence
Gorai.010G166900-JGI_221_v2.1	5.42904	3.04813	2	Gorai.010G166900	gi|295393249|gb|HM014161.1|_Gossypium_hirsutum_9-cis-epoxycarotenoid_dioxygenase_mRNA,_complete_cds
Gorai.010G102900-JGI_221_v2.1	4.53595	3.50214	2	Gorai.010G102900	___NoMatchedTerm___
Gorai.010G080600-JGI_221_v2.1	4.97652	1.65415	2	Gorai.010G080600	___NoMatchedTerm___
Gorai.010G037700-JGI_221_v2.1	4.05053	3.04813	2	Gorai.010G037700	gi|519685486|gb|JX579381.1|_Gossypium_hirsutum_clone_NBRI_GE11601_microsatellite_sequence
Gorai.010G019500-JGI_221_v2.1	3.96814	2.13957	2	Gorai.010G019500	gi|529067113|gb|JX964290.1|_Gossypium_hirsutum_clone_NBRI_TRANS-559_microsatellite_sequence
Gorai.009G416500-JGI_221_v2.1	4.7286	1.50214	2	Gorai.009G416500	___NoMatchedTerm___
Gorai.009G416400-JGI_221_v2.1	5.42904	3.7262	2	Gorai.009G416400	___NoMatchedTerm___
Gorai.009G412000-JGI_221_v2.1	4.53595	3.89613	2	Gorai.009G412000	gi|114795791|gb|DQ908524.1|_Gossypium_hirsutum_clone_LIB5327-034-A1-N1-G4_P_S_Gh588_microsatellite_sequence
Gorai.009G411100-JGI_221_v2.1	4.42904	3.7262	2	Gorai.009G411100	gi|114795679|gb|DQ908412.1|_Gossypium_hirsutum_clone_LIB5327-024-A1-N1-F12_P_S_Gh473_microsatellite_sequence
Gorai.009G399200-JGI_221_v2.1	4.81606	3.61762	2	Gorai.009G399200	gi|317172001|gb|HQ524364.1|_Gossypium_herbaceum_clone_NBRI_C107_simple_sequence_repeat_marker,_genomic_sequence
Gorai.009G340300-JGI_221_v2.1	4.53595	3.89613	2	Gorai.009G340300	___NoMatchedTerm___
Gorai.009G326600-JGI_221_v2.1	5.53595	3.82407	2	Gorai.009G326600	___NoMatchedTerm___
Gorai.009G218200-JGI_221_v2.1	6.31356	3.03266	2	Gorai.009G218200	___NoMatchedTerm___
Gorai.009G164000-JGI_221_v2.1	4.7286	2.7262	2	Gorai.009G164000	___NoMatchedTerm___
Gorai.009G133400-JGI_221_v2.1	4.7286	2.7262	2	Gorai.009G133400	___NoMatchedTerm___
Gorai.009G114200-JGI_221_v2.1	3.89852	3.23911	2	Gorai.009G114200	___NoMatchedTerm___
Gorai.009G112200-JGI_221_v2.1	4.81606	2.91718	2	Gorai.009G112200	___NoMatchedTerm___
Gorai.009G092700-JGI_221_v2.1	4.89852	3.50214	2	Gorai.009G092700	___NoMatchedTerm___
Gorai.009G086300-JGI_221_v2.1	5.31356	3.82407	2	Gorai.009G086300	___NoMatchedTerm___
Gorai.009G050000-JGI_221_v2.1	5.18803	1.7262	2	Gorai.009G050000	___NoMatchedTerm___
Gorai.009G009200-JGI_221_v2.1	4.18803	1.82407	2	Gorai.009G009200	___NoMatchedTerm___
Gorai.008G235800-JGI_221_v2.1	4.05053	3.7262	2	Gorai.008G235800	gi|519684659|gb|JX578554.1|_Gossypium_hirsutum_clone_NBRI_GE10599_microsatellite_sequence
Gorai.008G227800-JGI_221_v2.1	4.42904	1.23911	2	Gorai.008G227800	gi|586637254|gb|KC847232.1|_Gossypium_hirsutum_NAC_domain_protein_NAC55_mRNA,_complete_cds
Gorai.008G210800-JGI_221_v2.1	4.31356	4.18563	2	Gorai.008G210800	___NoMatchedTerm___
Gorai.008G164000-JGI_221_v2.1	5.37245	3.7262	2	Gorai.008G164000	___NoMatchedTerm___
Gorai.008G134900-JGI_221_v2.1	4.35001	3.41968	2	Gorai.008G134900	gi|519682985|gb|JX576880.1|_Gossypium_hirsutum_clone_NBRI_GE8601_microsatellite_sequence
Gorai.008G132900-JGI_221_v2.1	6.40102	3.0871	2	Gorai.008G132900	gi|519688461|gb|JX582356.1|_Gossypium_hirsutum_clone_NBRI_GE15174_microsatellite_sequence
Gorai.008G131700-JGI_221_v2.1	3.89852	2.7262	2	Gorai.008G131700	___NoMatchedTerm___
Gorai.008G130000-JGI_221_v2.1	3.89852	3.7262	2	Gorai.008G130000	___NoMatchedTerm___
Gorai.008G114400-JGI_221_v2.1	5.25216	3.53356	2	Gorai.008G114400	gi|519748864|gb|JX615751.1|_Gossypium_hirsutum_clone_NBRI_GE59919_microsatellite_sequence
Gorai.008G107300-JGI_221_v2.1	3.78173	3.41968	2	Gorai.008G107300	gi|519687436|gb|JX581331.1|_Gossypium_hirsutum_clone_NBRI_GE13939_microsatellite_sequence
Gorai.008G075900-JGI_221_v2.1	6.05053	2.0871	2	Gorai.008G075900	gi|519703879|gb|JX597659.1|_Gossypium_hirsutum_clone_NBRI_GE34606_microsatellite_sequence
Gorai.008G048600-JGI_221_v2.1	6.15486	2.77516	2	Gorai.008G048600	gi|519759630|gb|JX621096.1|_Gossypium_hirsutum_clone_NBRI_GE67525_microsatellite_sequence
Gorai.008G042200-JGI_221_v2.1	4.7286	3.82407	2	Gorai.008G042200	___NoMatchedTerm___
Gorai.008G020100-JGI_221_v2.1	6.08615	2.33222	2	Gorai.008G020100	gi|519765448|gb|JX623206.1|_Gossypium_hirsutum_clone_NBRI_GE70297_microsatellite_sequence
Gorai.008G009800-JGI_221_v2.1	3.62419	2.56104	2	Gorai.008G009800	gi|312032541|gb|AC243108.1|_Gossypium_raimondii_clone_GR__Ba0022M02-hvj,_complete_sequence
Gorai.007G349300-JGI_221_v2.1	4.89852	3.04813	2	Gorai.007G349300	___NoMatchedTerm___
Gorai.007G322200-JGI_221_v2.1	3.7286	3.31116	2	Gorai.007G322200	___NoMatchedTerm___
Gorai.007G274100-JGI_221_v2.1	4.31356	3.31116	2	Gorai.007G274100	___NoMatchedTerm___
Gorai.007G244400-JGI_221_v2.1	4.89852	3.53356	2	Gorai.007G244400	___NoMatchedTerm___
Gorai.007G183100-JGI_221_v2.1	4.7286	3.7262	2	Gorai.007G183100	___NoMatchedTerm___
Gorai.007G141600-JGI_221_v2.1	4.53595	3.31116	2	Gorai.007G141600	gi|519700126|gb|JX593970.1|_Gossypium_hirsutum_clone_NBRI_GE29804_microsatellite_sequence
Gorai.007G111200-JGI_221_v2.1	4.63549	3.04813	2	Gorai.007G111200	gi|519683624|gb|JX577519.1|_Gossypium_hirsutum_clone_NBRI_GE9361_microsatellite_sequence
Gorai.007G062400-JGI_221_v2.1	3.53595	2.50214	2	Gorai.007G062400	___NoMatchedTerm___
Gorai.007G049800-JGI_221_v2.1	4.09367	3.67207	2	Gorai.007G049800	gi|519761500|gb|JX621931.1|_Gossypium_hirsutum_clone_NBRI_GE68555_microsatellite_sequence
Gorai.007G021500-JGI_221_v2.1	4.05053	2.0871	2	Gorai.007G021500	gi|170674733|gb|EU532416.1|_Gossypium_barbadense_clone_VJ3-6_ISSR_marker_genomic_sequence
Gorai.007G004100-JGI_221_v2.1	3.53595	2.37661	2	Gorai.007G004100	___NoMatchedTerm___
Gorai.006G251800-JGI_221_v2.1	4.18803	3.23911	2	Gorai.006G251800	gi|50313463|gb|AY574038.1|_Gossypium_hirsutum_cyclopropane_fatty_acid_synthase_(CPA-FAS-3)_mRNA,_complete_cds
Gorai.006G237800-JGI_221_v2.1	5.81606	3.7262	2	Gorai.006G237800	___NoMatchedTerm___
Gorai.006G230100-JGI_221_v2.1	3.53595	2.72453	2	Gorai.006G230100	___NoMatchedTerm___
Gorai.006G216900-JGI_221_v2.1	4.18803	2.56104	2	Gorai.006G216900	___NoMatchedTerm___
Gorai.006G171500-JGI_221_v2.1	5.89852	3.0871	2	Gorai.006G171500	___NoMatchedTerm___
Gorai.006G159900-JGI_221_v2.1	3.7286	2.50214	2	Gorai.006G159900	gi|114795679|gb|DQ908412.1|_Gossypium_hirsutum_clone_LIB5327-024-A1-N1-F12_P_S_Gh473_microsatellite_sequence
Gorai.006G152300-JGI_221_v2.1	4.05053	1.91718	2	Gorai.006G152300	___NoMatchedTerm___
Gorai.006G057600-JGI_221_v2.1	5.12091	3.89613	2	Gorai.006G057600	___NoMatchedTerm___
Gorai.006G055900-JGI_221_v2.1	3.62419	2.91718	2	Gorai.006G055900	___NoMatchedTerm___
Gorai.005G239500-JGI_221_v2.1	4.05053	3.89613	2	Gorai.005G239500	___NoMatchedTerm___
Gorai.005G168800-JGI_221_v2.1	5.25216	3.72453	2	Gorai.005G168800	___NoMatchedTerm___
Gorai.005G073500-JGI_221_v2.1	5.25216	3.41968	2	Gorai.005G073500	___NoMatchedTerm___
Gorai.005G062100-JGI_221_v2.1	3.89852	2.72453	2	Gorai.005G062100	___NoMatchedTerm___
Gorai.005G012200-JGI_221_v2.1	7.18803	2.88681	2	Gorai.005G012200	___NoMatchedTerm___
Gorai.005G001800-JGI_221_v2.1	4.18803	4.0871	2	Gorai.005G001800	___NoMatchedTerm___
Gorai.004G292600-JGI_221_v2.1	4.97652	1.7262	2	Gorai.004G292600	gi|519701052|gb|JX594832.1|_Gossypium_hirsutum_clone_NBRI_GE30916_microsatellite_sequence
Gorai.004G290100-JGI_221_v2.1	4.7286	3.53356	2	Gorai.004G290100	___NoMatchedTerm___
Gorai.004G281600-JGI_221_v2.1	3.89852	3.50214	2	Gorai.004G281600	___NoMatchedTerm___
Gorai.004G272000-JGI_221_v2.1	3.44731	2.23911	2	Gorai.004G272000	gi|317174797|gb|HQ527016.1|_Gossypium_herbaceum_clone_NBRI_B_4585_simple_sequence_repeat_marker,_mRNA_sequence
Gorai.004G259100-JGI_221_v2.1	4.42904	3.7262	2	Gorai.004G259100	___NoMatchedTerm___
Gorai.004G239700-JGI_221_v2.1	5.42904	3.77516	2	Gorai.004G239700	___NoMatchedTerm___
Gorai.004G224700-JGI_221_v2.1	4.89852	2.7262	2	Gorai.004G224700	___NoMatchedTerm___
Gorai.004G161800-JGI_221_v2.1	4.05053	3.53356	2	Gorai.004G161800	___NoMatchedTerm___
Gorai.004G135500-JGI_221_v2.1	4.05053	1.65415	2	Gorai.004G135500	gi|519691739|gb|JX585634.1|_Gossypium_hirsutum_clone_NBRI_GE19259_microsatellite_sequence
Gorai.004G133400-JGI_221_v2.1	3.7286	3.61762	2	Gorai.004G133400	gi|519695615|gb|JX589510.1|_Gossypium_hirsutum_clone_NBRI_GE24228_microsatellite_sequence
Gorai.004G128800-JGI_221_v2.1	4.5676	3.91718	2	Gorai.004G128800	gi|256537910|gb|GQ394965.1|_Gossypium_hirsutum_cultivar_Delta_Opal_clone_MONCS1988_SSR_marker_DPL0357_genomic_sequence
Gorai.004G098900-JGI_221_v2.1	4.42904	2.50214	2	Gorai.004G098900	___NoMatchedTerm___
Gorai.004G086000-JGI_221_v2.1	5.05053	3.72453	2	Gorai.004G086000	gi|519695534|gb|JX589429.1|_Gossypium_hirsutum_clone_NBRI_GE24129_microsatellite_sequence
Gorai.004G035300-JGI_221_v2.1	4.97652	2.91718	2	Gorai.004G035300	gi|312032596|gb|AC243164.1|_Gossypium_hirsutum_clone_MX177F15-jon,_complete_sequence
Gorai.004G026100-JGI_221_v2.1	4.97652	3.0871	2	Gorai.004G026100	___NoMatchedTerm___
Gorai.004G016200-JGI_221_v2.1	4.63549	2.31116	2	Gorai.004G016200	gi|519698543|gb|JX592438.1|_Gossypium_hirsutum_clone_NBRI_GE27878_microsatellite_sequence
Gorai.003G165500-JGI_221_v2.1	3.87794	3.50214	2	Gorai.003G165500	___NoMatchedTerm___
Gorai.003G146300-JGI_221_v2.1	4.81606	3.91718	2	Gorai.003G146300	gi|519686983|gb|JX580878.1|_Gossypium_hirsutum_clone_NBRI_GE13391_microsatellite_sequence
Gorai.003G043600-JGI_221_v2.1	4.81606	3.7262	2	Gorai.003G043600	___NoMatchedTerm___
Gorai.003G004500-JGI_221_v2.1	3.89852	4.23911	2	Gorai.003G004500	___NoMatchedTerm___
Gorai.002G257100-JGI_221_v2.1	4.05053	2.0871	2	Gorai.002G257100	gi|519698046|gb|JX591941.1|_Gossypium_hirsutum_clone_NBRI_GE27228_microsatellite_sequence
Gorai.002G246000-JGI_221_v2.1	5.37245	3.85578	2	Gorai.002G246000	gi|39652055|emb|AJ567145.1|_Gossypium_hirsutum_microsatellite_DNA_mGhCIR199,_clone_CIR199
Gorai.002G205600-JGI_221_v2.1	3.7286	3.50214	2	Gorai.002G205600	gi|519690746|gb|JX584641.1|_Gossypium_hirsutum_clone_NBRI_GE17996_microsatellite_sequence
Gorai.002G118600-JGI_221_v2.1	3.89852	2.03266	2	Gorai.002G118600	___NoMatchedTerm___
Gorai.002G096400-JGI_221_v2.1	5.58658	2.31116	2	Gorai.002G096400	gi|519762661|gb|JX622422.1|_Gossypium_hirsutum_clone_NBRI_GE69148_microsatellite_sequence
Gorai.002G092100-JGI_221_v2.1	3.89852	2.03266	2	Gorai.002G092100	gi|519748786|gb|JX615699.1|_Gossypium_hirsutum_clone_NBRI_GE59829_microsatellite_sequence
Gorai.002G063100-JGI_221_v2.1	4.18803	3.91718	2	Gorai.002G063100	___NoMatchedTerm___
Gorai.002G048200-JGI_221_v2.1	4.18803	3.04813	2	Gorai.002G048200	___NoMatchedTerm___
Gorai.002G039900-JGI_221_v2.1	5.12091	3.50214	2	Gorai.002G039900	___NoMatchedTerm___
Gorai.002G010400-JGI_221_v2.1	4.7286	2.91718	2	Gorai.002G010400	___NoMatchedTerm___
Gorai.002G003800-JGI_221_v2.1	5.18803	3.67207	2	Gorai.002G003800	gi|519697552|gb|JX591447.1|_Gossypium_hirsutum_clone_NBRI_GE26580_microsatellite_sequence
Gorai.002G002600-JGI_221_v2.1	4.42904	4.04813	2	Gorai.002G002600	___NoMatchedTerm___
Gorai.001G274000-JGI_221_v2.1	3.53595	2.72453	2	Gorai.001G274000	___NoMatchedTerm___
Gorai.001G235700-JGI_221_v2.1	3.89852	3.0871	2	Gorai.001G235700	___NoMatchedTerm___
Gorai.001G235200-JGI_221_v2.1	4.97652	3.7262	2	Gorai.001G235200	___NoMatchedTerm___
Gorai.001G231100-JGI_221_v2.1	4.89852	2.23911	2	Gorai.001G231100	gi|519691238|gb|JX585133.1|_Gossypium_hirsutum_clone_NBRI_GE18618_microsatellite_sequence
Gorai.001G215400-JGI_221_v2.1	4.7286	4.04813	2	Gorai.001G215400	gi|256537375|gb|GQ394430.1|_Gossypium_hirsutum_cultivar_Deltapine_388_clone_MONCS2271_SSR_marker_DPL0920_genomic_sequence
Gorai.001G214800-JGI_221_v2.1	4.7286	2.61762	2	Gorai.001G214800	gi|519748982|gb|JX615813.1|_Gossypium_hirsutum_clone_NBRI_GE60031_microsatellite_sequence
Gorai.001G189300-JGI_221_v2.1	4.53595	3.72453	2	Gorai.001G189300	gi|519693124|gb|JX587019.1|_Gossypium_hirsutum_clone_NBRI_GE21001_microsatellite_sequence
Gorai.001G079000-JGI_221_v2.1	4.31356	3.61762	2	Gorai.001G079000	gi|519747857|gb|JX615173.1|_Gossypium_hirsutum_clone_NBRI_GE59024_microsatellite_sequence
Gorai.001G039700-JGI_221_v2.1	3.7286	3.04813	2	Gorai.001G039700	gi|256536247|gb|GQ393302.1|_Gossypium_hirsutum_cultivar_Deltapine_33_B_clone_MONCS0267_SSR_marker_CGR5177_genomic_sequence
Gorai.N005900-JGI_221_v2.1	3.89852	3.7262	2	Gorai.N005900	gi|256536939|gb|GQ393994.1|_Gossypium_hirsutum_cultivar_Deltapine_33_B_clone_MONCS0959_SSR_marker_CGR6189_genomic_sequence
Gorai.013G260500-JGI_221_v2.1	4.05053	3.31116	2	Gorai.013G260500	___NoMatchedTerm___
Gorai.011G176800-JGI_221_v2.1	4.05053	1.50214	2	Gorai.011G176800	___NoMatchedTerm___
Gorai.010G009200-JGI_221_v2.1	3.53595	1.7262	2	Gorai.010G009200	___NoMatchedTerm___
Gorai.009G070800-JGI_221_v2.1	3.89852	2.7262	2	Gorai.009G070800	___NoMatchedTerm___
Gorai.008G197000-JGI_221_v2.1	3.89852	4.18563	2	Gorai.008G197000	___NoMatchedTerm___
Gorai.007G092500-JGI_221_v2.1	3.89852	3.89613	2	Gorai.007G092500	gi|519696394|gb|JX590289.1|_Gossypium_hirsutum_clone_NBRI_GE25174_microsatellite_sequence
Gorai.006G194100-JGI_221_v2.1	3.7286	1.7262	2	Gorai.006G194100	___NoMatchedTerm___
Gorai.004G229000-JGI_221_v2.1	3.7286	3.04813	2	Gorai.004G229000	gi|256568428|gb|FJ646599.1|_Gossypium_hirsutum_PIP_protein_(PIP2;8)_mRNA,_complete_cds
Gorai.004G033600-JGI_221_v2.1	4.63549	3.31116	2	Gorai.004G033600	gi|519746121|gb|JX614463.1|_Gossypium_hirsutum_clone_NBRI_GE57855_microsatellite_sequence
Gorai.003G132000-JGI_221_v2.1	3.7286	2.7262	2	Gorai.003G132000	gi|529066152|gb|JX964140.1|_Gossypium_hirsutum_clone_NBRI_TRANS-409_microsatellite_sequence
Gorai.002G166500-JGI_221_v2.1	4.05053	3.04813	2	Gorai.002G166500	gi|378747833|gb|JN899157.1|_Gossypium_hirsutum_clone_MF-1_methylation-sensitive_polymorphic_site_genomic_sequence
Gorai.001G210300-JGI_221_v2.1	3.89852	4.18563	2	Gorai.001G210300	___NoMatchedTerm___
Gorai.001G155200-JGI_221_v2.1	4.18803	1.7262	2	Gorai.001G155200	___NoMatchedTerm___
Gorai.009G222300-JGI_221_v2.1	1.03128	0.142472	2	Gorai.009G222300	___NoMatchedTerm___
Gorai.009G006400-JGI_221_v2.1	1.63996	0.218835	2	Gorai.009G006400	___NoMatchedTerm___
Gorai.011G019500-JGI_221_v2.1	1.87794	-0.389482	2	Gorai.011G019500	___NoMatchedTerm___
Gorai.001G012000-JGI_221_v2.1	1.59617	-0.728712	2	Gorai.001G012000	gi|519754001|gb|JX618229.1|_Gossypium_hirsutum_clone_NBRI_GE63625_microsatellite_sequence
Gorai.009G345000-JGI_221_v2.1	3.01121	-0.436458	2	Gorai.009G345000	gi|519687218|gb|JX581113.1|_Gossypium_hirsutum_clone_NBRI_GE13674_microsatellite_sequence
Gorai.005G099400-JGI_221_v2.1	1.24568	0.0691825	2	Gorai.005G099400	___NoMatchedTerm___
Gorai.013G194700-JGI_221_v2.1	1.92375	-0.419856	2	Gorai.013G194700	gi|519690602|gb|JX584497.1|_Gossypium_hirsutum_clone_NBRI_GE17819_microsatellite_sequence
Gorai.008G212300-JGI_221_v2.1	1.32585	-0.475138	2	Gorai.008G212300	gi|519692303|gb|JX586198.1|_Gossypium_hirsutum_clone_NBRI_GE19961_microsatellite_sequence
Gorai.008G018700-JGI_221_v2.1	1.24568	-0.423858	2	Gorai.008G018700	___NoMatchedTerm___
Gorai.007G074400-JGI_221_v2.1	1.50871	-0.395978	2	Gorai.007G074400	___NoMatchedTerm___
Gorai.004G121700-JGI_221_v2.1	2.69634	-0.819786	2	Gorai.004G121700	gi|529067531|gb|JX964336.1|_Gossypium_hirsutum_clone_NBRI_TRANS-605_microsatellite_sequence
Gorai.004G008000-JGI_221_v2.1	1.60182	-0.117586	2	Gorai.004G008000	gi|256536616|gb|GQ393671.1|_Gossypium_hirsutum_cultivar_Deltapine_33_B_clone_MONCS0636_SSR_marker_CGR5694_genomic_sequence
Gorai.011G019600-JGI_221_v2.1	2.7286	-1.40475	2	Gorai.011G019600	___NoMatchedTerm___
Gorai.009G161600-JGI_221_v2.1	1.50871	-0.667783	2	Gorai.009G161600	gi|49333382|gb|AY632360.1|_Gossypium_hirsutum_BAC_106I22,_complete_sequence
Gorai.009G076800-JGI_221_v2.1	1.24568	-0.0828206	2	Gorai.009G076800	___NoMatchedTerm___
Gorai.005G224400-JGI_221_v2.1	2.01121	-0.667783	2	Gorai.005G224400	___NoMatchedTerm___
Gorai.013G030100-JGI_221_v2.1	2.31356	0.0240946	2	Gorai.013G030100	gi|519697113|gb|JX591008.1|_Gossypium_hirsutum_clone_NBRI_GE26039_microsatellite_sequence
Gorai.012G037600-JGI_221_v2.1	2.09367	-0.497858	2	Gorai.012G037600	gi|206584336|gb|EU706338.1|_Gossypium_hirsutum_NAC_domain_protein_NAC1_(NAC1)_mRNA,_complete_cds
Gorai.011G215600-JGI_221_v2.1	2.09367	-1.08282	2	Gorai.011G215600	___NoMatchedTerm___
Gorai.011G015200-JGI_221_v2.1	2.38318	0.180214	2	Gorai.011G015200	___NoMatchedTerm___
Gorai.011G007500-JGI_221_v2.1	1.7311	-0.890176	2	Gorai.011G007500	gi|317172619|gb|HQ524838.1|_Gossypium_herbaceum_clone_NBRI_B_6434_simple_sequence_repeat_marker,_mRNA_sequence
Gorai.010G147700-JGI_221_v2.1	1.58671	0.917179	2	Gorai.010G147700	___NoMatchedTerm___
Gorai.009G198000-JGI_221_v2.1	1.7311	-0.252746	2	Gorai.009G198000	gi|256536295|gb|GQ393350.1|_Gossypium_hirsutum_cultivar_Deltapine_33_B_clone_MONCS0315_SSR_marker_CGR5236_genomic_sequence
Gorai.008G291500-JGI_221_v2.1	1.33879	0.502142	2	Gorai.008G291500	___NoMatchedTerm___
Gorai.008G274200-JGI_221_v2.1	2.50871	-0.720251	2	Gorai.008G274200	___NoMatchedTerm___
Gorai.008G222700-JGI_221_v2.1	2.7286	0.332217	2	Gorai.008G222700	___NoMatchedTerm___
Gorai.008G104800-JGI_221_v2.1	1.7311	-0.0828206	2	Gorai.008G104800	___NoMatchedTerm___
Gorai.008G072500-JGI_221_v2.1	0.923748	0.0871044	2	Gorai.008G072500	___NoMatchedTerm___
Gorai.008G036700-JGI_221_v2.1	1.7311	0.431753	2	Gorai.008G036700	___NoMatchedTerm___
Gorai.007G212600-JGI_221_v2.1	2.09367	-0.667783	2	Gorai.007G212600	___NoMatchedTerm___
Gorai.007G032700-JGI_221_v2.1	1.50871	0.502142	2	Gorai.007G032700	___NoMatchedTerm___
Gorai.006G186700-JGI_221_v2.1	1.92375	0.139572	2	Gorai.006G186700	gi|519684781|gb|JX578676.1|_Gossypium_hirsutum_clone_NBRI_GE10748_microsatellite_sequence
Gorai.006G151500-JGI_221_v2.1	1.7286	-0.0828206	2	Gorai.006G151500	gi|89258497|gb|DQ372574.1|_Gossypium_hirsutum_short_chain_alcohol_dehydrogenase_mRNA,_complete_cds
Gorai.006G061200-JGI_221_v2.1	1.7286	0.753681	2	Gorai.006G061200	___NoMatchedTerm___
Gorai.005G219900-JGI_221_v2.1	1.24568	0.402606	2	Gorai.005G219900	___NoMatchedTerm___
Gorai.005G154700-JGI_221_v2.1	1.50871	0.724534	2	Gorai.005G154700	gi|256536718|gb|GQ393773.1|_Gossypium_hirsutum_cultivar_Deltapine_33_B_clone_MONCS0738_SSR_marker_CGR5823_genomic_sequence
Gorai.004G240100-JGI_221_v2.1	1.50871	-0.0828206	2	Gorai.004G240100	gi|519751026|gb|JX616858.1|_Gossypium_hirsutum_clone_NBRI_GE61801_microsatellite_sequence
Gorai.004G214900-JGI_221_v2.1	2.09367	0.402606	2	Gorai.004G214900	___NoMatchedTerm___
Gorai.002G113500-JGI_221_v2.1	1.38318	1.00464	2	Gorai.002G113500	gi|312032592|gb|AC243160.1|_Gossypium_hirsutum_clone_MX146F18-joh,_complete_sequence
Gorai.002G112100-JGI_221_v2.1	1.7311	0.222034	2	Gorai.002G112100	gi|519748373|gb|JX615491.1|_Gossypium_hirsutum_clone_NBRI_GE59501_microsatellite_sequence
Gorai.001G196100-JGI_221_v2.1	2.38318	-1.22032	2	Gorai.001G196100	gi|312032580|gb|AC243148.1|_Gossypium_hirsutum_clone_MX086N22-jhl,_complete_sequence
Gorai.012G020200-JGI_221_v2.1	1.7286	0.332217	2	Gorai.012G020200	___NoMatchedTerm___
Gorai.009G373500-JGI_221_v2.1	2.31356	-1.08282	2	Gorai.009G373500	___NoMatchedTerm___
Gorai.009G002800-JGI_221_v2.1	1.7286	0.917179	2	Gorai.009G002800	___NoMatchedTerm___
Gorai.006G199700-JGI_221_v2.1	1.7286	-0.0828206	2	Gorai.006G199700	___NoMatchedTerm___
Gorai.006G068600-JGI_221_v2.1	1.7286	0.917179	2	Gorai.006G068600	___NoMatchedTerm___
Gorai.005G202000-JGI_221_v2.1	3.05053	0.402606	2	Gorai.005G202000	gi|519695566|gb|JX589461.1|_Gossypium_hirsutum_clone_NBRI_GE24171_microsatellite_sequence
Gorai.005G003900-JGI_221_v2.1	2.31356	-1.08282	2	Gorai.005G003900	___NoMatchedTerm___
Gorai.004G293500-JGI_221_v2.1	1.7286	0.726202	2	Gorai.004G293500	___NoMatchedTerm___
Gorai.004G009500-JGI_221_v2.1	1.7286	-0.0828206	2	Gorai.004G009500	___NoMatchedTerm___
Gorai.002G262300-JGI_221_v2.1	2.31356	-0.0828206	2	Gorai.002G262300	gi|315436721|gb|GU299534.1|_Gossypium_barbadense_verticillium_wilt_resistance-like_protein_(Vd2)_mRNA,_complete_cds
Gorai.002G048900-JGI_221_v2.1	1.7286	-1.08282	2	Gorai.002G048900	gi|519684481|gb|JX578376.1|_Gossypium_hirsutum_clone_NBRI_GE10383_microsatellite_sequence
Gorai.001G187300-JGI_221_v2.1	1.7286	0.239108	2	Gorai.001G187300	___NoMatchedTerm___
Gorai.001G127000-JGI_221_v2.1	1.7286	0.502142	2	Gorai.001G127000	gi|519692580|gb|JX586475.1|_Gossypium_hirsutum_clone_NBRI_GE20307_microsatellite_sequence
Gorai.012G032500-JGI_221_v2.1	1.7286	-0.809023	2	Gorai.012G032500	___NoMatchedTerm___
Gorai.005G188400-JGI_221_v2.1	1.7286	0	2	Gorai.005G188400	___NoMatchedTerm___
Gorai.006G016400-JGI_221_v2.1	1.78624	-0.875016	2	Gorai.006G016400	___NoMatchedTerm___
Gorai.003G106400-JGI_221_v2.1	1.77619	-1.02142	2	Gorai.003G106400	___NoMatchedTerm___
Gorai.002G206700-JGI_221_v2.1	2.4018	-1.56521	2	Gorai.002G206700	gi|519702628|gb|JX596408.1|_Gossypium_hirsutum_clone_NBRI_GE32986_microsatellite_sequence
Gorai.005G012700-JGI_221_v2.1	2.19677	-1.63031	2	Gorai.005G012700	gi|20378894|gb|AF469090.1|_Gossypium_hirsutum_clone_GhRGA_C_NBS_resistance_protein-like_protein_gene,_partial_cds
Gorai.003G128500-JGI_221_v2.1	1.92375	-1.22032	2	Gorai.003G128500	___NoMatchedTerm___
Gorai.004G038100-JGI_221_v2.1	3.31356	-2.54225	2	Gorai.004G038100	gi|519694576|gb|JX588471.1|_Gossypium_hirsutum_clone_NBRI_GE22906_microsatellite_sequence
Gorai.012G134600-JGI_221_v2.1	2.7286	-2.49786	2	Gorai.012G134600	___NoMatchedTerm___
Gorai.008G013900-JGI_221_v2.1	2.62419	-2.34585	2	Gorai.008G013900	gi|317173610|gb|HQ525829.1|_Gossypium_herbaceum_clone_NBRI_B_3806_simple_sequence_repeat_marker,_mRNA_sequence
Gorai.006G215700-JGI_221_v2.1	2.38318	-1.51578	2	Gorai.006G215700	___NoMatchedTerm___
Gorai.005G075600-JGI_221_v2.1	2.24568	-1.66778	2	Gorai.005G075600	___NoMatchedTerm___
Gorai.011G006800-JGI_221_v2.1	1.7286	-1.08282	2	Gorai.011G006800	___NoMatchedTerm___
Gorai.002G196400-JGI_221_v2.1	3.31356	-2.66778	2	Gorai.002G196400	gi|146762447|gb|EF571899.1|_Gossypium_hirsutum_RNA-dependent_RNA_polymerase_gene,_promoter_region_and_complete_cds
Gorai.001G209900-JGI_221_v2.1	1.7286	-1.08282	2	Gorai.001G209900	gi|519685610|gb|JX579505.1|_Gossypium_hirsutum_clone_NBRI_GE11761_microsatellite_sequence
Gorai.001G027000-JGI_221_v2.1	1.7286	-1.08282	2	Gorai.001G027000	___NoMatchedTerm___
Gorai.009G455700-JGI_221_v2.1	1.7286	-0.809023	2	Gorai.009G455700	___NoMatchedTerm___
Gorai.002G115500-JGI_221_v2.1	1.7286	-0.809023	2	Gorai.002G115500	gi|519685149|gb|JX579044.1|_Gossypium_hirsutum_clone_NBRI_GE11202_microsatellite_sequence
Gorai.013G156600-JGI_221_v2.1	2.1936	0.412228	2	Gorai.013G156600	gi|317175237|gb|HQ527456.1|_Gossypium_herbaceum_clone_NBRI_B2_533_simple_sequence_repeat_marker,_mRNA_sequence
Gorai.013G033200-JGI_221_v2.1	2.11241	0.618364	2	Gorai.013G033200	___NoMatchedTerm___
Gorai.013G023400-JGI_221_v2.1	2.34583	1.07817	2	Gorai.013G023400	gi|121755800|gb|EF187439.1|_Gossypium_hirsutum_cultivar_T586_chalcone_isomerase_mRNA,_complete_cds
Gorai.011G161300-JGI_221_v2.1	2.09449	1.24154	2	Gorai.011G161300	gi|258489603|gb|FJ713476.1|_Gossypium_hirsutum_chalcone_synthase_1_mRNA,_complete_cds
Gorai.011G049200-JGI_221_v2.1	1.82375	0.980232	2	Gorai.011G049200	gi|519697598|gb|JX591493.1|_Gossypium_hirsutum_clone_NBRI_GE26633_microsatellite_sequence
Gorai.009G426900-JGI_221_v2.1	2.09215	1.08266	2	Gorai.009G426900	gi|30983941|gb|AY273901.1|_Gossypium_barbadense_putative_polyubiquitin_mRNA,_partial_cds
Gorai.009G285900-JGI_221_v2.1	2.42589	0.859723	2	Gorai.009G285900	___NoMatchedTerm___
Gorai.009G265100-JGI_221_v2.1	2.20093	0.861029	2	Gorai.009G265100	gi|122938396|gb|EF202090.1|_Gossypium_hirsutum_MADS-box_protein_MADS6_mRNA,_complete_cds
Gorai.009G235000-JGI_221_v2.1	2.79855	1.1364	2	Gorai.009G235000	gi|156066903|gb|EF553531.1|_Gossypium_hirsutum_3-deoxy-arabino_heptulosonate_7-phosphate_synthase_mRNA,_partial_cds
Gorai.009G200600-JGI_221_v2.1	2.22361	1.13909	2	Gorai.009G200600	gi|258489657|gb|FJ713480.1|_Gossypium_hirsutum_dihydroflavonol_4-reductase_mRNA,_complete_cds
Gorai.009G148400-JGI_221_v2.1	2.18009	0.738494	2	Gorai.009G148400	___NoMatchedTerm___
Gorai.009G132200-JGI_221_v2.1	1.78263	1.25334	2	Gorai.009G132200	gi|22531415|emb|AJ458442.1|_Gossypium_hirsutum_mRNA_for_IAA16_protein
Gorai.008G113600-JGI_221_v2.1	2.58977	1.28148	2	Gorai.008G113600	gi|218675783|gb|FJ440839.1|_Gossypium_hirsutum_cultivar_Coker-312_5-enolpyruvylshikimate-3-phosphate_synthase_mRNA,_complete_cds
Gorai.008G061900-JGI_221_v2.1	2.01891	1.02498	2	Gorai.008G061900	gi|519686336|gb|JX580231.1|_Gossypium_hirsutum_clone_NBRI_GE12621_microsatellite_sequence
Gorai.007G253100-JGI_221_v2.1	2.30065	0.955616	2	Gorai.007G253100	gi|317174132|gb|HQ526351.1|_Gossypium_herbaceum_clone_NBRI_D_EYT27PB02C5VZ8_simple_sequence_repeat_marker,_mRNA_sequence
Gorai.007G194700-JGI_221_v2.1	2.43856	0.615733	2	Gorai.007G194700	gi|74273632|gb|DQ122183.1|_Gossypium_hirsutum_gibberellin_3-hydroxylase_2_mRNA,_partial_cds
Gorai.007G173500-JGI_221_v2.1	2.23432	0.930236	2	Gorai.007G173500	gi|519766151|gb|JX623629.1|_Gossypium_hirsutum_clone_NBRI_GE70957_microsatellite_sequence
Gorai.007G047400-JGI_221_v2.1	2.15132	1.26391	2	Gorai.007G047400	gi|40850675|gb|AY461804.2|_Gossypium_hirsutum_betaine-aldehyde_dehydrogenase_mRNA,_complete_cds
Gorai.007G035800-JGI_221_v2.1	2.50365	0.801796	2	Gorai.007G035800	___NoMatchedTerm___
Gorai.006G064600-JGI_221_v2.1	2.10562	1.36007	2	Gorai.006G064600	___NoMatchedTerm___
Gorai.005G100100-JGI_221_v2.1	2.54052	0.549377	2	Gorai.005G100100	gi|519684618|gb|JX578513.1|_Gossypium_hirsutum_clone_NBRI_GE10555_microsatellite_sequence
Gorai.005G082400-JGI_221_v2.1	2.08866	0.49507	2	Gorai.005G082400	gi|1220195|gb|U49061.1|GHU49061_Gossypium_hirsutum_alcohol_dehydrogenase_2a_mRNA,_complete_cds
Gorai.004G194000-JGI_221_v2.1	2.22331	1.31019	2	Gorai.004G194000	gi|38456077|gb|AY464065.1|_Gossypium_hirsutum_clone_ON035N9_mRNA_sequence
Gorai.004G178800-JGI_221_v2.1	2.05028	0.584604	2	Gorai.004G178800	gi|529070580|gb|JX964578.1|_Gossypium_hirsutum_clone_NBRI_TRANS-847_microsatellite_sequence
Gorai.003G052100-JGI_221_v2.1	2.68245	1.2932	2	Gorai.003G052100	gi|315419006|gb|HM462000.1|_Gossypium_hirsutum_4CL_mRNA,_complete_cds
Gorai.002G262000-JGI_221_v2.1	2.39274	0.96771	2	Gorai.002G262000	gi|519695405|gb|JX589300.1|_Gossypium_hirsutum_clone_NBRI_GE23972_microsatellite_sequence
Gorai.002G233700-JGI_221_v2.1	2.45834	1.00722	2	Gorai.002G233700	___NoMatchedTerm___
Gorai.002G198900-JGI_221_v2.1	2.23927	0.691874	2	Gorai.002G198900	gi|317172975|gb|HQ525194.1|_Gossypium_herbaceum_clone_NBRI_D2_364_simple_sequence_repeat_marker,_mRNA_sequence
Gorai.001G134900-JGI_221_v2.1	2.65212	0.694123	2	Gorai.001G134900	gi|197259949|gb|EU921266.1|_Gossypium_hirsutum_cultivar_Xincai_5_flavonoid_3'5'-hydroxylase_mRNA,_complete_cds
Gorai.013G037600-JGI_221_v2.1	2.00654	0.968254	2	Gorai.013G037600	___NoMatchedTerm___
Gorai.013G035700-JGI_221_v2.1	2.41313	0.592431	2	Gorai.013G035700	gi|317174324|gb|HQ526543.1|_Gossypium_herbaceum_clone_NBRI_B_848_simple_sequence_repeat_marker,_mRNA_sequence
Gorai.011G268900-JGI_221_v2.1	2.53846	1.09761	2	Gorai.011G268900	gi|519686486|gb|JX580381.1|_Gossypium_hirsutum_clone_NBRI_GE12793_microsatellite_sequence
Gorai.011G166300-JGI_221_v2.1	2.0164	0.884151	2	Gorai.011G166300	___NoMatchedTerm___
Gorai.010G049200-JGI_221_v2.1	2.28959	0.700113	2	Gorai.010G049200	gi|153805697|gb|EF643508.1|_Gossypium_hirsutum_nodulin_family_protein_(NLP)_mRNA,_complete_cds
Gorai.009G334100-JGI_221_v2.1	2.22448	0.251465	2	Gorai.009G334100	___NoMatchedTerm___
Gorai.009G292800-JGI_221_v2.1	2.51059	1.16339	2	Gorai.009G292800	gi|519685146|gb|JX579041.1|_Gossypium_hirsutum_clone_NBRI_GE11198_microsatellite_sequence
Gorai.009G057400-JGI_221_v2.1	2.21508	1.32877	2	Gorai.009G057400	___NoMatchedTerm___
Gorai.007G303800-JGI_221_v2.1	2.07391	0.74056	2	Gorai.007G303800	gi|310833353|gb|GU292050.1|_Gossypium_hirsutum_dehydration-induced_19-like_protein_(Di19-2)_mRNA,_complete_cds
Gorai.007G112900-JGI_221_v2.1	2.07903	1.17453	2	Gorai.007G112900	___NoMatchedTerm___
Gorai.006G118100-JGI_221_v2.1	2.12064	1.14124	2	Gorai.006G118100	gi|33391720|gb|AY335818.1|_Gossypium_hirsutum_beta-D-glucosidase_mRNA,_complete_cds
Gorai.005G019700-JGI_221_v2.1	2.0816	0.268508	2	Gorai.005G019700	gi|317174632|gb|HQ526851.1|_Gossypium_herbaceum_clone_NBRI_B_EYI1BW404ID6IP_simple_sequence_repeat_marker,_mRNA_sequence
Gorai.005G012900-JGI_221_v2.1	2.08866	0.809845	2	Gorai.005G012900	gi|519686151|gb|JX580046.1|_Gossypium_hirsutum_clone_NBRI_GE12402_microsatellite_sequence
Gorai.004G260100-JGI_221_v2.1	2.49925	1.29257	2	Gorai.004G260100	___NoMatchedTerm___
Gorai.004G054900-JGI_221_v2.1	2.24042	1.06837	2	Gorai.004G054900	gi|519685610|gb|JX579505.1|_Gossypium_hirsutum_clone_NBRI_GE11761_microsatellite_sequence
Gorai.002G046200-JGI_221_v2.1	2.57309	0.891493	2	Gorai.002G046200	gi|211906525|gb|FJ415210.1|_Gossypium_hirsutum_clone_RHM1_rhamnose_synthase_mRNA,_complete_cds
Gorai.013G250200-JGI_221_v2.1	2.0515	0.917179	2	Gorai.013G250200	___NoMatchedTerm___
Gorai.013G151900-JGI_221_v2.1	2.05701	0.659111	2	Gorai.013G151900	gi|519742462|gb|JX613151.1|_Gossypium_hirsutum_clone_NBRI_GE55982_microsatellite_sequence
Gorai.013G147100-JGI_221_v2.1	2.39562	0.644161	2	Gorai.013G147100	gi|166977622|gb|EU373057.1|_Gossypium_hirsutum_gland_development_related_protein_67-like_mRNA,_partial_sequence
Gorai.013G052900-JGI_221_v2.1	2.22241	0.336636	2	Gorai.013G052900	gi|529068304|gb|JX964457.1|_Gossypium_hirsutum_clone_NBRI_TRANS-726_microsatellite_sequence
Gorai.013G042300-JGI_221_v2.1	2.4896	1.13536	2	Gorai.013G042300	___NoMatchedTerm___
Gorai.013G019500-JGI_221_v2.1	2.44432	0.983269	2	Gorai.013G019500	gi|317172950|gb|HQ525169.1|_Gossypium_herbaceum_clone_NBRI_C_4556_simple_sequence_repeat_marker,_mRNA_sequence
Gorai.012G145600-JGI_221_v2.1	2.7173	0.909052	2	Gorai.012G145600	___NoMatchedTerm___
Gorai.012G110900-JGI_221_v2.1	2.21161	0.780606	2	Gorai.012G110900	___NoMatchedTerm___
Gorai.012G086800-JGI_221_v2.1	2.19677	0.771047	2	Gorai.012G086800	gi|519694401|gb|JX588296.1|_Gossypium_hirsutum_clone_NBRI_GE22684_microsatellite_sequence
Gorai.012G055600-JGI_221_v2.1	2.31148	0.701451	2	Gorai.012G055600	gi|519750447|gb|JX616585.1|_Gossypium_hirsutum_clone_NBRI_GE61353_microsatellite_sequence
Gorai.012G049400-JGI_221_v2.1	2.24937	0.828952	2	Gorai.012G049400	gi|114795379|gb|DQ908113.1|_Gossypium_hirsutum_clone_LIB5327-026-A1-N1-C12_PS_Gh171_microsatellite_sequence
Gorai.012G045800-JGI_221_v2.1	2.00412	1.01393	2	Gorai.012G045800	___NoMatchedTerm___
Gorai.011G274300-JGI_221_v2.1	2.31607	0.00234679	2	Gorai.011G274300	gi|519704792|gb|JX598484.1|_Gossypium_hirsutum_clone_NBRI_GE35681_microsatellite_sequence
Gorai.011G269100-JGI_221_v2.1	2.21968	0.852084	2	Gorai.011G269100	___NoMatchedTerm___
Gorai.011G241200-JGI_221_v2.1	2.40834	0.563871	2	Gorai.011G241200	gi|74486731|gb|DQ174252.1|_Gossypium_hirsutum_translation_elongation_factor_1A-3_(EF1A3)_mRNA,_complete_cds
Gorai.011G238100-JGI_221_v2.1	2.66071	0.579546	2	Gorai.011G238100	___NoMatchedTerm___
Gorai.011G199600-JGI_221_v2.1	2.73625	0.59749	2	Gorai.011G199600	gi|317174570|gb|HQ526789.1|_Gossypium_herbaceum_clone_NBRI_D2_811_simple_sequence_repeat_marker,_mRNA_sequence
Gorai.011G145500-JGI_221_v2.1	2.54042	0.301843	2	Gorai.011G145500	___NoMatchedTerm___
Gorai.011G095000-JGI_221_v2.1	2.03417	0.247027	2	Gorai.011G095000	___NoMatchedTerm___
Gorai.011G084700-JGI_221_v2.1	2.24903	0.484051	2	Gorai.011G084700	___NoMatchedTerm___
Gorai.011G014700-JGI_221_v2.1	2.57284	1.25635	2	Gorai.011G014700	___NoMatchedTerm___
Gorai.011G003900-JGI_221_v2.1	2.2243	0.869085	2	Gorai.011G003900	___NoMatchedTerm___
Gorai.010G236200-JGI_221_v2.1	2.64957	0.654145	2	Gorai.010G236200	___NoMatchedTerm___
Gorai.010G216500-JGI_221_v2.1	2.48599	0.466073	2	Gorai.010G216500	gi|519711638|gb|JX603568.1|_Gossypium_hirsutum_clone_NBRI_GE42516_microsatellite_sequence
Gorai.010G163900-JGI_221_v2.1	2.09367	0.712821	2	Gorai.010G163900	___NoMatchedTerm___
Gorai.010G133400-JGI_221_v2.1	2.1302	0.153786	2	Gorai.010G133400	___NoMatchedTerm___
Gorai.010G122200-JGI_221_v2.1	2.46256	1.07839	2	Gorai.010G122200	___NoMatchedTerm___
Gorai.010G105600-JGI_221_v2.1	2.21251	0.873236	2	Gorai.010G105600	___NoMatchedTerm___
Gorai.010G070400-JGI_221_v2.1	2.05185	0.595251	2	Gorai.010G070400	___NoMatchedTerm___
Gorai.010G035900-JGI_221_v2.1	2.73491	0.615624	2	Gorai.010G035900	___NoMatchedTerm___
Gorai.010G035600-JGI_221_v2.1	2.26127	0.976612	2	Gorai.010G035600	___NoMatchedTerm___
Gorai.009G414000-JGI_221_v2.1	2.20778	1.04091	2	Gorai.009G414000	___NoMatchedTerm___
Gorai.009G323600-JGI_221_v2.1	2.23663	1.08895	2	Gorai.009G323600	gi|519688070|gb|JX581965.1|_Gossypium_hirsutum_clone_NBRI_GE14717_microsatellite_sequence
Gorai.009G272200-JGI_221_v2.1	2.37932	0.814331	2	Gorai.009G272200	gi|519686461|gb|JX580356.1|_Gossypium_hirsutum_clone_NBRI_GE12767_microsatellite_sequence
Gorai.009G267800-JGI_221_v2.1	2.10595	1.10776	2	Gorai.009G267800	___NoMatchedTerm___
Gorai.009G253700-JGI_221_v2.1	2.70962	0.538668	2	Gorai.009G253700	gi|529061475|gb|JX963782.1|_Gossypium_hirsutum_clone_NBRI_TRANS-1010_microsatellite_sequence
Gorai.009G239300-JGI_221_v2.1	2.11752	0.859076	2	Gorai.009G239300	___NoMatchedTerm___
Gorai.009G212800-JGI_221_v2.1	2.29752	0.509095	2	Gorai.009G212800	gi|519723925|gb|JX608832.1|_Gossypium_hirsutum_clone_NBRI_GE49842_microsatellite_sequence
Gorai.009G142100-JGI_221_v2.1	2.42625	1.11809	2	Gorai.009G142100	gi|29836506|gb|AY117081.1|_Gossypium_raimondii_putative_root_hair_defective_3_protein_gene,_partial_cds
Gorai.009G132600-JGI_221_v2.1	2.03709	1.33222	2	Gorai.009G132600	gi|519684473|gb|JX578368.1|_Gossypium_hirsutum_clone_NBRI_GE10373_microsatellite_sequence
Gorai.009G118900-JGI_221_v2.1	2.10595	1.12414	2	Gorai.009G118900	gi|317174308|gb|HQ526527.1|_Gossypium_herbaceum_clone_NBRI_D_EYT27PB02ELABJ_simple_sequence_repeat_marker,_mRNA_sequence
Gorai.009G106100-JGI_221_v2.1	2.44731	1.13331	2	Gorai.009G106100	gi|317173143|gb|HQ525362.1|_Gossypium_herbaceum_clone_NBRI_C_EYT27PB01AZ4MQ_simple_sequence_repeat_marker,_mRNA_sequence
Gorai.009G092400-JGI_221_v2.1	2.77575	0.760778	2	Gorai.009G092400	___NoMatchedTerm___
Gorai.009G082900-JGI_221_v2.1	2.00297	0.724534	2	Gorai.009G082900	gi|317173004|gb|HQ525223.1|_Gossypium_herbaceum_clone_NBRI_D_EYT27PB02D89QN_simple_sequence_repeat_marker,_mRNA_sequence
Gorai.009G076300-JGI_221_v2.1	2.09367	1.04528	2	Gorai.009G076300	gi|166977625|gb|EU373059.1|_Gossypium_hirsutum_gland_development_related_protein_69-like_mRNA,_complete_sequence
Gorai.009G012600-JGI_221_v2.1	2.31115	1.15348	2	Gorai.009G012600	___NoMatchedTerm___
Gorai.008G297000-JGI_221_v2.1	2.44731	1.08626	2	Gorai.008G297000	gi|315307480|gb|HQ650106.1|_Gossypium_hirsutum_clone_BAC_067L14,_complete_sequence
Gorai.008G271300-JGI_221_v2.1	2.48627	0.879596	2	Gorai.008G271300	gi|166977673|gb|EU373075.1|_Gossypium_hirsutum_gland_development_related_protein_85-like_mRNA,_complete_sequence
Gorai.008G270000-JGI_221_v2.1	2.38727	0.488967	2	Gorai.008G270000	gi|39652205|emb|AJ567295.1|_Gossypium_hirsutum_microsatellite_DNA_mGhCIR362,_clone_CIR362
Gorai.008G221600-JGI_221_v2.1	2.05185	0.930315	2	Gorai.008G221600	gi|519685232|gb|JX579127.1|_Gossypium_hirsutum_clone_NBRI_GE11309_microsatellite_sequence
Gorai.008G161400-JGI_221_v2.1	2.14614	0.604795	2	Gorai.008G161400	gi|519683152|gb|JX577047.1|_Gossypium_hirsutum_clone_NBRI_GE8798_microsatellite_sequence
Gorai.008G139800-JGI_221_v2.1	2.00716	0.195481	2	Gorai.008G139800	___NoMatchedTerm___
Gorai.008G119900-JGI_221_v2.1	1.17168	0.799343	2	Gorai.008G119900	gi|519684496|gb|JX578391.1|_Gossypium_hirsutum_clone_NBRI_GE10403_microsatellite_sequence
Gorai.008G094400-JGI_221_v2.1	2.19987	0.925741	2	Gorai.008G094400	___NoMatchedTerm___
Gorai.008G011700-JGI_221_v2.1	2.2852	0.861836	2	Gorai.008G011700	___NoMatchedTerm___
Gorai.008G010500-JGI_221_v2.1	2.31331	0.359538	2	Gorai.008G010500	gi|312032564|gb|AC243131.1|_Gossypium_hirsutum_clone_MX002H10-jne,_complete_sequence
Gorai.007G350200-JGI_221_v2.1	2.26479	1.19503	2	Gorai.007G350200	gi|519699549|gb|JX593444.1|_Gossypium_hirsutum_clone_NBRI_GE29135_microsatellite_sequence
Gorai.007G310100-JGI_221_v2.1	2.03787	0.862918	2	Gorai.007G310100	gi|317174088|gb|HQ526307.1|_Gossypium_herbaceum_clone_NBRI_C_EYT27PB01ATA8G_simple_sequence_repeat_marker,_mRNA_sequence
Gorai.007G257500-JGI_221_v2.1	2.4694	1.26768	2	Gorai.007G257500	___NoMatchedTerm___
Gorai.007G243100-JGI_221_v2.1	2.0515	0.766558	2	Gorai.007G243100	___NoMatchedTerm___
Gorai.007G179800-JGI_221_v2.1	2.17856	1.18538	2	Gorai.007G179800	gi|519738582|gb|JX611658.1|_Gossypium_hirsutum_clone_NBRI_GE53885_microsatellite_sequence
Gorai.007G142100-JGI_221_v2.1	2.21443	1.36754	2	Gorai.007G142100	___NoMatchedTerm___
Gorai.007G127000-JGI_221_v2.1	2.40487	1.11472	2	Gorai.007G127000	___NoMatchedTerm___
Gorai.007G124900-JGI_221_v2.1	2.2325	1.37534	2	Gorai.007G124900	___NoMatchedTerm___
Gorai.007G093500-JGI_221_v2.1	2.21653	0.845286	2	Gorai.007G093500	___NoMatchedTerm___
Gorai.007G093000-JGI_221_v2.1	2.19546	1.28283	2	Gorai.007G093000	___NoMatchedTerm___
Gorai.007G072300-JGI_221_v2.1	2.46291	0.595251	2	Gorai.007G072300	___NoMatchedTerm___
Gorai.007G069900-JGI_221_v2.1	2.54173	0.460134	2	Gorai.007G069900	gi|317174623|gb|HQ526842.1|_Gossypium_herbaceum_clone_NBRI_A_EYI1BW401CHNYJ_simple_sequence_repeat_marker,_mRNA_sequence
Gorai.007G069600-JGI_221_v2.1	2.04101	0.623734	2	Gorai.007G069600	gi|519682990|gb|JX576885.1|_Gossypium_hirsutum_clone_NBRI_GE8606_microsatellite_sequence
Gorai.007G034000-JGI_221_v2.1	2.06604	0.742739	2	Gorai.007G034000	gi|317172797|gb|HQ525016.1|_Gossypium_herbaceum_clone_NBRI_E_415_simple_sequence_repeat_marker,_mRNA_sequence
Gorai.007G030800-JGI_221_v2.1	2.22587	0.911866	2	Gorai.007G030800	gi|317174817|gb|HQ527036.1|_Gossypium_herbaceum_clone_NBRI_D_1698_simple_sequence_repeat_marker,_mRNA_sequence
Gorai.007G013500-JGI_221_v2.1	2.11278	1.03781	2	Gorai.007G013500	gi|519683287|gb|JX577182.1|_Gossypium_hirsutum_clone_NBRI_GE8957_microsatellite_sequence
Gorai.006G259300-JGI_221_v2.1	2.57204	0.793444	2	Gorai.006G259300	___NoMatchedTerm___
Gorai.006G258700-JGI_221_v2.1	2.24568	0.531436	2	Gorai.006G258700	gi|519688448|gb|JX582343.1|_Gossypium_hirsutum_clone_NBRI_GE15161_microsatellite_sequence
Gorai.006G256200-JGI_221_v2.1	2.55136	0.947174	2	Gorai.006G256200	gi|317175268|gb|HQ527487.1|_Gossypium_herbaceum_clone_NBRI_D_EYT27PB02EW76D_simple_sequence_repeat_marker,_mRNA_sequence
Gorai.006G211800-JGI_221_v2.1	2.34408	0.502142	2	Gorai.006G211800	___NoMatchedTerm___
Gorai.006G158900-JGI_221_v2.1	2.53354	0.891734	2	Gorai.006G158900	gi|317173651|gb|HQ525870.1|_Gossypium_herbaceum_clone_NBRI_C_EYT27PB01AP0D0_simple_sequence_repeat_marker,_mRNA_sequence
Gorai.006G151100-JGI_221_v2.1	2.11138	0.0435908	2	Gorai.006G151100	gi|519720295|gb|JX607451.1|_Gossypium_hirsutum_clone_NBRI_GE47882_microsatellite_sequence
Gorai.006G134300-JGI_221_v2.1	2.0576	1.13745	2	Gorai.006G134300	gi|317174405|gb|HQ526624.1|_Gossypium_herbaceum_clone_NBRI_B_EYI1BW404IJ35M_simple_sequence_repeat_marker,_mRNA_sequence
Gorai.006G004800-JGI_221_v2.1	2.33468	0.263175	2	Gorai.006G004800	gi|519750469|gb|JX616596.1|_Gossypium_hirsutum_clone_NBRI_GE61374_microsatellite_sequence
Gorai.005G199900-JGI_221_v2.1	2.2769	1.0871	2	Gorai.005G199900	___NoMatchedTerm___
Gorai.005G134000-JGI_221_v2.1	2.25935	0.861565	2	Gorai.005G134000	gi|519696306|gb|JX590201.1|_Gossypium_hirsutum_clone_NBRI_GE25065_microsatellite_sequence
Gorai.005G089900-JGI_221_v2.1	2.5587	0.867597	2	Gorai.005G089900	gi|519708534|gb|JX601992.1|_Gossypium_hirsutum_clone_NBRI_GE40398_microsatellite_sequence
Gorai.005G089300-JGI_221_v2.1	2.55934	0.917179	2	Gorai.005G089300	gi|39652043|emb|AJ567133.1|_Gossypium_hirsutum_microsatellite_DNA_mGhCIR186,_clone_CIR186
Gorai.005G015500-JGI_221_v2.1	2.05891	0.855779	2	Gorai.005G015500	gi|519750042|gb|JX616384.1|_Gossypium_hirsutum_clone_NBRI_GE61001_microsatellite_sequence
Gorai.005G012500-JGI_221_v2.1	2.05952	1.31806	2	Gorai.005G012500	___NoMatchedTerm___
Gorai.004G288600-JGI_221_v2.1	2.34329	1.00794	2	Gorai.004G288600	gi|519685006|gb|JX578901.1|_Gossypium_hirsutum_clone_NBRI_GE11026_microsatellite_sequence
Gorai.004G246500-JGI_221_v2.1	2.42255	0.713166	2	Gorai.004G246500	gi|317173371|gb|HQ525590.1|_Gossypium_herbaceum_clone_NBRI_B2_76_simple_sequence_repeat_marker,_mRNA_sequence
Gorai.004G238500-JGI_221_v2.1	2.51537	1.05962	2	Gorai.004G238500	___NoMatchedTerm___
Gorai.004G237800-JGI_221_v2.1	2.33879	1.38134	2	Gorai.004G237800	gi|25992528|gb|AF531363.1|_Gossypium_barbadense_fiber_protein_Fb2_mRNA,_complete_cds
Gorai.004G222000-JGI_221_v2.1	2.46372	1.0871	2	Gorai.004G222000	___NoMatchedTerm___
Gorai.004G186900-JGI_221_v2.1	2.27739	1.2843	2	Gorai.004G186900	gi|256536606|gb|GQ393661.1|_Gossypium_hirsutum_cultivar_Deltapine_33_B_clone_MONCS0626_SSR_marker_CGR5684_genomic_sequence
Gorai.004G165200-JGI_221_v2.1	2.10209	0.363979	2	Gorai.004G165200	___NoMatchedTerm___
Gorai.004G139800-JGI_221_v2.1	2.38318	1.13635	2	Gorai.004G139800	___NoMatchedTerm___
Gorai.004G137000-JGI_221_v2.1	2.10129	0.984294	2	Gorai.004G137000	gi|317172540|gb|HQ524759.1|_Gossypium_herbaceum_clone_NBRI_A2_2329_simple_sequence_repeat_marker,_mRNA_sequence
Gorai.004G070000-JGI_221_v2.1	1.66432	1.11649	2	Gorai.004G070000	gi|317175497|gb|HQ527716.1|_Gossypium_herbaceum_clone_NBRI_C_EYT27PB01BQHT6_simple_sequence_repeat_marker,_mRNA_sequence
Gorai.004G046100-JGI_221_v2.1	2.74575	0.770338	2	Gorai.004G046100	gi|519689327|gb|JX583222.1|_Gossypium_hirsutum_clone_NBRI_GE16212_microsatellite_sequence
Gorai.004G038500-JGI_221_v2.1	2.57064	0.917179	2	Gorai.004G038500	gi|529072812|gb|JX964685.1|_Gossypium_hirsutum_clone_NBRI_TRANS-954_microsatellite_sequence
Gorai.004G035700-JGI_221_v2.1	2.41053	0.680322	2	Gorai.004G035700	gi|56475245|gb|AY685680.1|_Gossypium_arboreum_unknown_mRNA
Gorai.004G028200-JGI_221_v2.1	2.21443	1.11828	2	Gorai.004G028200	gi|529067108|gb|JX964289.1|_Gossypium_hirsutum_clone_NBRI_TRANS-558_microsatellite_sequence
Gorai.003G182200-JGI_221_v2.1	2.67269	0.84679	2	Gorai.003G182200	___NoMatchedTerm___
Gorai.003G152000-JGI_221_v2.1	2.00528	0.841628	2	Gorai.003G152000	___NoMatchedTerm___
Gorai.003G093200-JGI_221_v2.1	2.01413	1.20734	2	Gorai.003G093200	gi|317174078|gb|HQ526297.1|_Gossypium_herbaceum_clone_NBRI_C_EYT27PB01B7EP6_simple_sequence_repeat_marker,_mRNA_sequence
Gorai.002G245700-JGI_221_v2.1	2.04121	0.449325	2	Gorai.002G245700	gi|317173664|gb|HQ525883.1|_Gossypium_herbaceum_clone_NBRI_C_EYT27PB01BMHZY_simple_sequence_repeat_marker,_mRNA_sequence
Gorai.002G225800-JGI_221_v2.1	2.37953	1.39399	2	Gorai.002G225800	gi|519696903|gb|JX590798.1|_Gossypium_hirsutum_clone_NBRI_GE25788_microsatellite_sequence
Gorai.002G220000-JGI_221_v2.1	2.44731	0.522462	2	Gorai.002G220000	gi|519685348|gb|JX579243.1|_Gossypium_hirsutum_clone_NBRI_GE11445_microsatellite_sequence
Gorai.002G176200-JGI_221_v2.1	2.12784	1.29109	2	Gorai.002G176200	___NoMatchedTerm___
Gorai.002G140900-JGI_221_v2.1	2.11045	0.228538	2	Gorai.002G140900	___NoMatchedTerm___
Gorai.002G123400-JGI_221_v2.1	2.02021	1.00137	2	Gorai.002G123400	gi|166343832|gb|EU375997.1|_Gossypium_hirsutum_beta-tubulin_13_mRNA,_complete_cds
Gorai.002G080700-JGI_221_v2.1	2.1302	0.309497	2	Gorai.002G080700	gi|114795335|gb|DQ908069.1|_Gossypium_hirsutum_clone_LIB5327-027-A1-N1-G6_PS_Gh127_microsatellite_sequence
Gorai.001G269400-JGI_221_v2.1	2.53461	0.870258	2	Gorai.001G269400	gi|519683018|gb|JX576913.1|_Gossypium_hirsutum_clone_NBRI_GE8636_microsatellite_sequence
Gorai.001G211100-JGI_221_v2.1	2.28023	0.742954	2	Gorai.001G211100	gi|312032513|gb|AC243080.1|_Gossypium_arboreum_clone_GAH174K06-jlo,_complete_sequence
Gorai.001G147400-JGI_221_v2.1	2.55472	0.644161	2	Gorai.001G147400	gi|519697260|gb|JX591155.1|_Gossypium_hirsutum_clone_NBRI_GE26214_microsatellite_sequence
Gorai.001G100300-JGI_221_v2.1	2.38754	0.491221	2	Gorai.001G100300	gi|529066076|gb|JX964128.1|_Gossypium_hirsutum_clone_NBRI_TRANS-397_microsatellite_sequence
Gorai.001G082400-JGI_221_v2.1	2.06943	0.463269	2	Gorai.001G082400	___NoMatchedTerm___
Gorai.001G071000-JGI_221_v2.1	2.69634	0.8537	2	Gorai.001G071000	gi|148841126|gb|EF464674.1|_Gossypium_hirsutum_GDP-mannose_pyrophosphorylase_mRNA,_partial_cds
Gorai.001G030700-JGI_221_v2.1	2.26479	0.762205	2	Gorai.001G030700	___NoMatchedTerm___
Gorai.013G265100-JGI_221_v2.1	2.12015	0.554609	2	Gorai.013G265100	gi|312032532|gb|AC243099.1|_Gossypium_arboreum_clone_GM166L10-jhd,_complete_sequence
Gorai.013G169800-JGI_221_v2.1	2.01121	0.796498	2	Gorai.013G169800	gi|55419651|gb|AY779340.1|_Gossypium_hirsutum_SBP_transcription_factor_mRNA,_complete_cds
Gorai.013G166300-JGI_221_v2.1	2.7311	1.0257	2	Gorai.013G166300	___NoMatchedTerm___
Gorai.013G116700-JGI_221_v2.1	1.43154	1.13957	2	Gorai.013G116700	___NoMatchedTerm___
Gorai.013G070300-JGI_221_v2.1	2.33314	1.19471	2	Gorai.013G070300	gi|519693853|gb|JX587748.1|_Gossypium_hirsutum_clone_NBRI_GE21953_microsatellite_sequence
Gorai.012G172700-JGI_221_v2.1	2.32747	0.67968	2	Gorai.012G172700	___NoMatchedTerm___
Gorai.012G145900-JGI_221_v2.1	2.63647	0.454445	2	Gorai.012G145900	gi|519690430|gb|JX584325.1|_Gossypium_hirsutum_clone_NBRI_GE17601_microsatellite_sequence
Gorai.012G123900-JGI_221_v2.1	2.22143	0.312039	2	Gorai.012G123900	___NoMatchedTerm___
Gorai.012G046700-JGI_221_v2.1	2.52861	0.880654	2	Gorai.012G046700	gi|519696287|gb|JX590182.1|_Gossypium_hirsutum_clone_NBRI_GE25040_microsatellite_sequence
Gorai.011G283200-JGI_221_v2.1	2.24568	0.421652	2	Gorai.011G283200	gi|256568420|gb|FJ646595.1|_Gossypium_hirsutum_PIP_protein_(PIP1;5)_mRNA,_complete_cds
Gorai.011G280400-JGI_221_v2.1	2.5001	0.460322	2	Gorai.011G280400	gi|519687036|gb|JX580931.1|_Gossypium_hirsutum_clone_NBRI_GE13454_microsatellite_sequence
Gorai.011G279900-JGI_221_v2.1	2.27425	0.703776	2	Gorai.011G279900	___NoMatchedTerm___
Gorai.011G255400-JGI_221_v2.1	2.38318	1.08965	2	Gorai.011G255400	___NoMatchedTerm___
Gorai.011G175400-JGI_221_v2.1	2.49774	0.266329	2	Gorai.011G175400	___NoMatchedTerm___
Gorai.011G152700-JGI_221_v2.1	2.11357	1.04842	2	Gorai.011G152700	___NoMatchedTerm___
Gorai.011G152500-JGI_221_v2.1	2.0562	0.569256	2	Gorai.011G152500	___NoMatchedTerm___
Gorai.011G130100-JGI_221_v2.1	2.36432	0.109824	2	Gorai.011G130100	___NoMatchedTerm___
Gorai.011G125600-JGI_221_v2.1	2.30745	0.83145	2	Gorai.011G125600	gi|519716089|gb|JX605599.1|_Gossypium_hirsutum_clone_NBRI_GE45315_microsatellite_sequence
Gorai.011G085700-JGI_221_v2.1	2.38318	0.854715	2	Gorai.011G085700	___NoMatchedTerm___
Gorai.011G079700-JGI_221_v2.1	2.34696	1.33222	2	Gorai.011G079700	gi|519689056|gb|JX582951.1|_Gossypium_hirsutum_clone_NBRI_GE15883_microsatellite_sequence
Gorai.011G078300-JGI_221_v2.1	2.71631	0.736607	2	Gorai.011G078300	___NoMatchedTerm___
Gorai.011G051800-JGI_221_v2.1	2.24568	0.590369	2	Gorai.011G051800	___NoMatchedTerm___
Gorai.011G011100-JGI_221_v2.1	2.31607	0.806621	2	Gorai.011G011100	___NoMatchedTerm___
Gorai.011G005300-JGI_221_v2.1	2.07755	0.917179	2	Gorai.011G005300	___NoMatchedTerm___
Gorai.010G227900-JGI_221_v2.1	2.45624	0.798535	2	Gorai.010G227900	___NoMatchedTerm___
Gorai.010G219800-JGI_221_v2.1	2.32585	0.167503	2	Gorai.010G219800	___NoMatchedTerm___
Gorai.010G185400-JGI_221_v2.1	2.46807	0.718275	2	Gorai.010G185400	gi|519748022|gb|JX615297.1|_Gossypium_hirsutum_clone_NBRI_GE59215_microsatellite_sequence
Gorai.010G174100-JGI_221_v2.1	2.35671	1.31146	2	Gorai.010G174100	gi|39651930|emb|AJ567020.1|_Gossypium_hirsutum_microsatellite_DNA_mGhCIR071,_clone_CIR071
Gorai.010G124000-JGI_221_v2.1	2.4598	0.936038	2	Gorai.010G124000	___NoMatchedTerm___
Gorai.010G098100-JGI_221_v2.1	2.09367	1.19402	2	Gorai.010G098100	gi|519690079|gb|JX583974.1|_Gossypium_hirsutum_clone_NBRI_GE17150_microsatellite_sequence
Gorai.010G072000-JGI_221_v2.1	2.21793	1.3203	2	Gorai.010G072000	gi|529067553|gb|JX964339.1|_Gossypium_hirsutum_clone_NBRI_TRANS-608_microsatellite_sequence
Gorai.010G037600-JGI_221_v2.1	2.54433	0.818264	2	Gorai.010G037600	___NoMatchedTerm___
Gorai.010G029100-JGI_221_v2.1	2.26952	0.941026	2	Gorai.010G029100	gi|519683085|gb|JX576980.1|_Gossypium_hirsutum_clone_NBRI_GE8714_microsatellite_sequence
Gorai.010G000900-JGI_221_v2.1	2.21325	0.797598	2	Gorai.010G000900	___NoMatchedTerm___
Gorai.009G241800-JGI_221_v2.1	2.17168	0.845626	2	Gorai.009G241800	___NoMatchedTerm___
Gorai.009G229500-JGI_221_v2.1	2.04844	1.12299	2	Gorai.009G229500	gi|519688276|gb|JX582171.1|_Gossypium_hirsutum_clone_NBRI_GE14952_microsatellite_sequence
Gorai.009G214500-JGI_221_v2.1	2.17168	1.08224	2	Gorai.009G214500	___NoMatchedTerm___
Gorai.009G170000-JGI_221_v2.1	2.24568	0.895153	2	Gorai.009G170000	gi|312032535|gb|AC243102.1|_Gossypium_arboreum_clone_GM226J06-jme,_complete_sequence
Gorai.009G118000-JGI_221_v2.1	2.23533	0.415985	2	Gorai.009G118000	___NoMatchedTerm___
Gorai.009G088500-JGI_221_v2.1	2.10366	1.23006	2	Gorai.009G088500	gi|211906519|gb|FJ415207.1|_Gossypium_hirsutum_clone_SpotAXS1_UDP-D-apiose/UPD-D-xylose_synthetase_mRNA,_complete_cds
Gorai.009G036500-JGI_221_v2.1	2.21199	0.534563	2	Gorai.009G036500	___NoMatchedTerm___
Gorai.009G015700-JGI_221_v2.1	2.03227	0.800855	2	Gorai.009G015700	gi|317173521|gb|HQ525740.1|_Gossypium_herbaceum_clone_NBRI_E_EYT27PB03F8I23_simple_sequence_repeat_marker,_mRNA_sequence
Gorai.009G003000-JGI_221_v2.1	2.18009	0.12363	2	Gorai.009G003000	___NoMatchedTerm___
Gorai.008G262500-JGI_221_v2.1	2.50871	1.18021	2	Gorai.008G262500	gi|519683865|gb|JX577760.1|_Gossypium_hirsutum_clone_NBRI_GE9650_microsatellite_sequence
Gorai.008G238900-JGI_221_v2.1	2.35913	0.952226	2	Gorai.008G238900	___NoMatchedTerm___
Gorai.008G181300-JGI_221_v2.1	2.29298	1.01294	2	Gorai.008G181300	___NoMatchedTerm___
Gorai.008G175400-JGI_221_v2.1	2.78173	0.672067	2	Gorai.008G175400	gi|519765145|gb|JX623071.1|_Gossypium_hirsutum_clone_NBRI_GE70094_microsatellite_sequence
Gorai.008G096500-JGI_221_v2.1	2.11639	0.785076	2	Gorai.008G096500	gi|519688601|gb|JX582496.1|_Gossypium_hirsutum_clone_NBRI_GE15333_microsatellite_sequence
Gorai.008G062100-JGI_221_v2.1	2.11357	0.917179	2	Gorai.008G062100	___NoMatchedTerm___
Gorai.008G055300-JGI_221_v2.1	2.32585	0.457748	2	Gorai.008G055300	gi|317174672|gb|HQ526891.1|_Gossypium_herbaceum_clone_NBRI_B_6256_simple_sequence_repeat_marker,_mRNA_sequence
Gorai.008G029700-JGI_221_v2.1	2.34329	0.989936	2	Gorai.008G029700	gi|317174349|gb|HQ526568.1|_Gossypium_herbaceum_clone_NBRI_B_5790_simple_sequence_repeat_marker,_mRNA_sequence
Gorai.008G008500-JGI_221_v2.1	2.45624	-0.144221	2	Gorai.008G008500	___NoMatchedTerm___
Gorai.007G295600-JGI_221_v2.1	2.13876	1.29157	2	Gorai.007G295600	___NoMatchedTerm___
Gorai.007G189900-JGI_221_v2.1	2.04713	1.28283	2	Gorai.007G189900	gi|519750255|gb|JX616491.1|_Gossypium_hirsutum_clone_NBRI_GE61201_microsatellite_sequence
Gorai.007G118500-JGI_221_v2.1	2.71224	0.715546	2	Gorai.007G118500	gi|519687484|gb|JX581379.1|_Gossypium_hirsutum_clone_NBRI_GE13999_microsatellite_sequence
Gorai.007G090800-JGI_221_v2.1	2.30622	0.753681	2	Gorai.007G090800	gi|317175722|gb|HQ527941.1|_Gossypium_herbaceum_clone_NBRI_B_1794_simple_sequence_repeat_marker,_mRNA_sequence
Gorai.007G068700-JGI_221_v2.1	2.01121	0.643614	2	Gorai.007G068700	___NoMatchedTerm___
Gorai.007G066800-JGI_221_v2.1	2.04928	0.64232	2	Gorai.007G066800	gi|317175511|gb|HQ527730.1|_Gossypium_herbaceum_clone_NBRI_A_5138_simple_sequence_repeat_marker,_mRNA_sequence
Gorai.007G037800-JGI_221_v2.1	2.32134	0.895806	2	Gorai.007G037800	___NoMatchedTerm___
Gorai.007G033500-JGI_221_v2.1	2.33879	0.874111	2	Gorai.007G033500	___NoMatchedTerm___
Gorai.007G005500-JGI_221_v2.1	2.29721	0.369054	2	Gorai.007G005500	___NoMatchedTerm___
Gorai.006G219400-JGI_221_v2.1	2.29879	0.791649	2	Gorai.006G219400	___NoMatchedTerm___
Gorai.006G212600-JGI_221_v2.1	2.33879	0.0400362	2	Gorai.006G212600	gi|519691885|gb|JX585780.1|_Gossypium_hirsutum_clone_NBRI_GE19444_microsatellite_sequence
Gorai.006G192800-JGI_221_v2.1	2.28832	1.25822	2	Gorai.006G192800	___NoMatchedTerm___
Gorai.006G187400-JGI_221_v2.1	2.26952	1.0871	2	Gorai.006G187400	gi|317172776|gb|HQ524995.1|_Gossypium_herbaceum_clone_NBRI_D_EYT27PB02DQOUY_simple_sequence_repeat_marker,_mRNA_sequence
Gorai.006G135900-JGI_221_v2.1	2.48446	0.267366	2	Gorai.006G135900	___NoMatchedTerm___
Gorai.006G103500-JGI_221_v2.1	2.14614	1.08464	2	Gorai.006G103500	gi|529061071|gb|JX963712.1|_Gossypium_hirsutum_clone_NBRI_TRANS-042_microsatellite_sequence
Gorai.006G049300-JGI_221_v2.1	2.33556	0.83145	2	Gorai.006G049300	___NoMatchedTerm___
Gorai.006G029400-JGI_221_v2.1	1.23533	0.687698	2	Gorai.006G029400	___NoMatchedTerm___
Gorai.006G028000-JGI_221_v2.1	2.05303	0.701451	2	Gorai.006G028000	___NoMatchedTerm___
Gorai.005G266700-JGI_221_v2.1	2.38318	0.54167	2	Gorai.005G266700	gi|519689367|gb|JX583262.1|_Gossypium_hirsutum_clone_NBRI_GE16262_microsatellite_sequence
Gorai.005G258800-JGI_221_v2.1	2.2813	0.613787	2	Gorai.005G258800	gi|327344116|gb|JF421227.1|_Gossypium_barbadense_putative_PDF1-interacting_protein_1_mRNA,_partial_cds
Gorai.005G235300-JGI_221_v2.1	2.11138	0.796164	2	Gorai.005G235300	___NoMatchedTerm___
Gorai.005G235200-JGI_221_v2.1	2.53846	1.21552	2	Gorai.005G235200	___NoMatchedTerm___
Gorai.005G234100-JGI_221_v2.1	2.50871	1.29569	2	Gorai.005G234100	___NoMatchedTerm___
Gorai.005G220500-JGI_221_v2.1	2.01121	0.716267	2	Gorai.005G220500	___NoMatchedTerm___
Gorai.005G148800-JGI_221_v2.1	2.30981	0.993801	2	Gorai.005G148800	___NoMatchedTerm___
Gorai.005G032800-JGI_221_v2.1	1.65167	0.5229	2	Gorai.005G032800	gi|52140149|gb|AY600419.1|_Gossypium_hirsutum_isolate_2_J21_NBS-LRR_resistance_protein-like_gene,_partial_sequence
Gorai.005G016400-JGI_221_v2.1	2.04928	0.917179	2	Gorai.005G016400	gi|519686544|gb|JX580439.1|_Gossypium_hirsutum_clone_NBRI_GE12869_microsatellite_sequence
Gorai.005G008200-JGI_221_v2.1	2.25873	-0.0327799	2	Gorai.005G008200	___NoMatchedTerm___
Gorai.004G289900-JGI_221_v2.1	2.34225	0.859694	2	Gorai.004G289900	gi|519686960|gb|JX580855.1|_Gossypium_hirsutum_clone_NBRI_GE13364_microsatellite_sequence
Gorai.004G278000-JGI_221_v2.1	2.29879	0.479058	2	Gorai.004G278000	___NoMatchedTerm___
Gorai.004G261300-JGI_221_v2.1	2.2677	0.884999	2	Gorai.004G261300	___NoMatchedTerm___
Gorai.004G159800-JGI_221_v2.1	2.43682	0.599439	2	Gorai.004G159800	gi|387940575|gb|JQ711138.1|_Gossypium_arboreum_angustifolia_(AN)_mRNA,_complete_cds
Gorai.004G130200-JGI_221_v2.1	2.43832	0.785076	2	Gorai.004G130200	gi|130775669|gb|EF440360.1|_Gossypium_hirsutum_oligopeptide_transporter_protein_OPT_mRNA,_partial_cds
Gorai.004G043000-JGI_221_v2.1	2.03526	0.819882	2	Gorai.004G043000	___NoMatchedTerm___
Gorai.004G032500-JGI_221_v2.1	2.14098	1.35158	2	Gorai.004G032500	gi|73761694|gb|DQ116447.1|_Gossypium_hirsutum_ethylene-responsive_element-binding_factor_(ERF3)_mRNA,_complete_cds
Gorai.004G029300-JGI_221_v2.1	2.39505	0.54723	2	Gorai.004G029300	___NoMatchedTerm___
Gorai.004G027300-JGI_221_v2.1	2.32974	0.222988	2	Gorai.004G027300	gi|519701818|gb|JX595598.1|_Gossypium_hirsutum_clone_NBRI_GE31902_microsatellite_sequence
Gorai.004G025600-JGI_221_v2.1	2.1302	0.640172	2	Gorai.004G025600	gi|317172991|gb|HQ525210.1|_Gossypium_herbaceum_clone_NBRI_D_EYT27PB02DCMO3_simple_sequence_repeat_marker,_mRNA_sequence
Gorai.004G003200-JGI_221_v2.1	2.09367	1.30283	2	Gorai.004G003200	___NoMatchedTerm___
Gorai.003G164400-JGI_221_v2.1	1.7681	1.03917	2	Gorai.003G164400	___NoMatchedTerm___
Gorai.003G113100-JGI_221_v2.1	2.08421	-0.0828206	2	Gorai.003G113100	gi|519704263|gb|JX598043.1|_Gossypium_hirsutum_clone_NBRI_GE35116_microsatellite_sequence
Gorai.003G096800-JGI_221_v2.1	2.44731	0.617619	2	Gorai.003G096800	___NoMatchedTerm___
Gorai.003G048300-JGI_221_v2.1	2.43471	0.664792	2	Gorai.003G048300	___NoMatchedTerm___
Gorai.003G046400-JGI_221_v2.1	2.74818	1.08429	2	Gorai.003G046400	___NoMatchedTerm___
Gorai.003G027000-JGI_221_v2.1	2.01772	1.29965	2	Gorai.003G027000	gi|519692323|gb|JX586218.1|_Gossypium_hirsutum_clone_NBRI_GE19986_microsatellite_sequence
Gorai.003G016400-JGI_221_v2.1	2.18909	0.862317	2	Gorai.003G016400	___NoMatchedTerm___
Gorai.003G002700-JGI_221_v2.1	2.00467	0.641545	2	Gorai.003G002700	___NoMatchedTerm___
Gorai.002G239400-JGI_221_v2.1	2.23454	0.544136	2	Gorai.002G239400	gi|35187434|gb|AY375328.1|_Gossypium_barbadense_fiber_protein_Fb5_mRNA,_partial_cds
Gorai.002G173300-JGI_221_v2.1	2.26614	0.769622	2	Gorai.002G173300	___NoMatchedTerm___
Gorai.002G153400-JGI_221_v2.1	2.24568	0.4615	2	Gorai.002G153400	___NoMatchedTerm___
Gorai.002G085200-JGI_221_v2.1	2.10961	1.11616	2	Gorai.002G085200	___NoMatchedTerm___
Gorai.002G074400-JGI_221_v2.1	2.02808	1.0965	2	Gorai.002G074400	gi|519692812|gb|JX586707.1|_Gossypium_hirsutum_clone_NBRI_GE20597_microsatellite_sequence
Gorai.002G072300-JGI_221_v2.1	2.24568	0.630298	2	Gorai.002G072300	___NoMatchedTerm___
Gorai.002G065100-JGI_221_v2.1	2.43154	0.0195411	2	Gorai.002G065100	gi|519689878|gb|JX583773.1|_Gossypium_hirsutum_clone_NBRI_GE16905_microsatellite_sequence
Gorai.002G030000-JGI_221_v2.1	2.01772	1.07945	2	Gorai.002G030000	___NoMatchedTerm___
Gorai.001G271700-JGI_221_v2.1	2.12538	0.810264	2	Gorai.001G271700	___NoMatchedTerm___
Gorai.001G259100-JGI_221_v2.1	2.22956	0.502142	2	Gorai.001G259100	___NoMatchedTerm___
Gorai.001G242400-JGI_221_v2.1	2.05028	0.508899	2	Gorai.001G242400	___NoMatchedTerm___
Gorai.001G237600-JGI_221_v2.1	2.54824	1.0455	2	Gorai.001G237600	gi|317173110|gb|HQ525329.1|_Gossypium_herbaceum_clone_NBRI_B_EYI1BW404IQ96G_simple_sequence_repeat_marker,_mRNA_sequence
Gorai.001G232700-JGI_221_v2.1	2.32687	1.13696	2	Gorai.001G232700	___NoMatchedTerm___
Gorai.001G218200-JGI_221_v2.1	2.59429	0.777455	2	Gorai.001G218200	gi|519689259|gb|JX583154.1|_Gossypium_hirsutum_clone_NBRI_GE16128_microsatellite_sequence
Gorai.001G207200-JGI_221_v2.1	2.2636	1.25598	2	Gorai.001G207200	gi|519694042|gb|JX587937.1|_Gossypium_hirsutum_clone_NBRI_GE22210_microsatellite_sequence
Gorai.001G195500-JGI_221_v2.1	2.16079	0.167723	2	Gorai.001G195500	gi|317175422|gb|HQ527641.1|_Gossypium_herbaceum_clone_NBRI_A_EYI1BW401BFKQL_simple_sequence_repeat_marker,_mRNA_sequence
Gorai.001G133800-JGI_221_v2.1	2.4416	1.10481	2	Gorai.001G133800	gi|519686959|gb|JX580854.1|_Gossypium_hirsutum_clone_NBRI_GE13363_microsatellite_sequence
Gorai.001G132100-JGI_221_v2.1	1.33092	0.571405	2	Gorai.001G132100	gi|519697529|gb|JX591424.1|_Gossypium_hirsutum_clone_NBRI_GE26552_microsatellite_sequence
Gorai.001G114600-JGI_221_v2.1	2.25526	1.16511	2	Gorai.001G114600	gi|317174532|gb|HQ526751.1|_Gossypium_herbaceum_clone_NBRI_E_EYT27PB03GYY1G_simple_sequence_repeat_marker,_mRNA_sequence
Gorai.001G109500-JGI_221_v2.1	2.30622	1.16772	2	Gorai.001G109500	gi|519683762|gb|JX577657.1|_Gossypium_hirsutum_clone_NBRI_GE9521_microsatellite_sequence
Gorai.001G028000-JGI_221_v2.1	2.01121	0.996907	2	Gorai.001G028000	___NoMatchedTerm___
Gorai.N025400-JGI_221_v2.1	2.44731	-0.552306	2	Gorai.N025400	___NoMatchedTerm___
Gorai.013G268500-JGI_221_v2.1	2.31607	0.724534	2	Gorai.013G268500	___NoMatchedTerm___
Gorai.013G242600-JGI_221_v2.1	2.12015	-0.185914	2	Gorai.013G242600	gi|519687794|gb|JX581689.1|_Gossypium_hirsutum_clone_NBRI_GE14372_microsatellite_sequence
Gorai.013G238600-JGI_221_v2.1	2.44731	0.987569	2	Gorai.013G238600	___NoMatchedTerm___
Gorai.013G221000-JGI_221_v2.1	2.14614	0.880654	2	Gorai.013G221000	___NoMatchedTerm___
Gorai.013G206700-JGI_221_v2.1	1.62419	-0.0828206	2	Gorai.013G206700	___NoMatchedTerm___
Gorai.013G174600-JGI_221_v2.1	2.02808	0.21674	2	Gorai.013G174600	___NoMatchedTerm___
Gorai.013G153600-JGI_221_v2.1	2.2813	0.834717	2	Gorai.013G153600	___NoMatchedTerm___
Gorai.013G074700-JGI_221_v2.1	2.38318	1.15422	2	Gorai.013G074700	___NoMatchedTerm___
Gorai.012G163000-JGI_221_v2.1	2.02328	0.827912	2	Gorai.012G163000	___NoMatchedTerm___
Gorai.012G143100-JGI_221_v2.1	2.46807	0.453232	2	Gorai.012G143100	___NoMatchedTerm___
Gorai.012G049500-JGI_221_v2.1	2.09367	1.20669	2	Gorai.012G049500	___NoMatchedTerm___
Gorai.012G002000-JGI_221_v2.1	2.47834	0.829717	2	Gorai.012G002000	___NoMatchedTerm___
Gorai.011G295000-JGI_221_v2.1	2.03923	0.371745	2	Gorai.011G295000	gi|519684750|gb|JX578645.1|_Gossypium_hirsutum_clone_NBRI_GE10710_microsatellite_sequence
Gorai.011G068800-JGI_221_v2.1	2.50871	0.654145	2	Gorai.011G068800	___NoMatchedTerm___
Gorai.010G254000-JGI_221_v2.1	1.7311	0.554609	2	Gorai.010G254000	gi|312032567|gb|AC243134.1|_Gossypium_hirsutum_clone_MX018L03-joq,_complete_sequence
Gorai.010G161400-JGI_221_v2.1	2.53846	0.524862	2	Gorai.010G161400	___NoMatchedTerm___
Gorai.010G002700-JGI_221_v2.1	2.44731	0.0871044	2	Gorai.010G002700	___NoMatchedTerm___
Gorai.009G422000-JGI_221_v2.1	2.5676	0.344601	2	Gorai.009G422000	___NoMatchedTerm___
Gorai.009G404000-JGI_221_v2.1	2.4156	0.850065	2	Gorai.009G404000	___NoMatchedTerm___
Gorai.009G362100-JGI_221_v2.1	2.19677	0.284911	2	Gorai.009G362100	gi|529068102|gb|JX964421.1|_Gossypium_hirsutum_clone_NBRI_TRANS-690_microsatellite_sequence
Gorai.009G331400-JGI_221_v2.1	2.17168	-0.00481808	2	Gorai.009G331400	gi|519692895|gb|JX586790.1|_Gossypium_hirsutum_clone_NBRI_GE20701_microsatellite_sequence
Gorai.009G307400-JGI_221_v2.1	2.38318	0.569256	2	Gorai.009G307400	___NoMatchedTerm___
Gorai.009G282600-JGI_221_v2.1	1.83064	0.839177	2	Gorai.009G282600	___NoMatchedTerm___
Gorai.009G248000-JGI_221_v2.1	2.31607	0.630875	2	Gorai.009G248000	gi|519696213|gb|JX590108.1|_Gossypium_hirsutum_clone_NBRI_GE24950_microsatellite_sequence
Gorai.009G227000-JGI_221_v2.1	2.10595	0.82407	2	Gorai.009G227000	gi|519686611|gb|JX580506.1|_Gossypium_hirsutum_clone_NBRI_GE12949_microsatellite_sequence
Gorai.009G189700-JGI_221_v2.1	2.24568	0.414679	2	Gorai.009G189700	___NoMatchedTerm___
Gorai.009G148100-JGI_221_v2.1	2.21653	0.783913	2	Gorai.009G148100	gi|529061721|gb|JX963824.1|_Gossypium_hirsutum_clone_NBRI_TRANS-1049_microsatellite_sequence
Gorai.009G120900-JGI_221_v2.1	2.65167	0.455599	2	Gorai.009G120900	___NoMatchedTerm___
Gorai.009G086000-JGI_221_v2.1	2.05303	0.783913	2	Gorai.009G086000	___NoMatchedTerm___
Gorai.009G063600-JGI_221_v2.1	2.50871	1.14748	2	Gorai.009G063600	___NoMatchedTerm___
Gorai.009G027500-JGI_221_v2.1	2.40487	0.703055	2	Gorai.009G027500	gi|14718994|gb|AF367245.1|AF367245_Gossypium_arboreum_ceramide_glucosyltransferase_mRNA,_complete_cds
Gorai.009G002000-JGI_221_v2.1	2.35001	0.758482	2	Gorai.009G002000	___NoMatchedTerm___
Gorai.008G252500-JGI_221_v2.1	2.03923	0.549448	2	Gorai.008G252500	___NoMatchedTerm___
Gorai.008G249200-JGI_221_v2.1	2.24568	0.627673	2	Gorai.008G249200	gi|312032588|gb|AC243156.1|_Gossypium_hirsutum_clone_MX119B12-jot,_complete_sequence
Gorai.008G149700-JGI_221_v2.1	2.06125	1.1611	2	Gorai.008G149700	___NoMatchedTerm___
Gorai.008G120100-JGI_221_v2.1	2.30226	0.806148	2	Gorai.008G120100	___NoMatchedTerm___
Gorai.008G090200-JGI_221_v2.1	2.50871	0.687698	2	Gorai.008G090200	gi|19698447|gb|AF485266.1|_Gossypium_hirsutum_gaiacol_peroxidase_(pod1)_mRNA,_complete_cds
Gorai.008G090100-JGI_221_v2.1	2.46807	0.621724	2	Gorai.008G090100	___NoMatchedTerm___
Gorai.008G051000-JGI_221_v2.1	2.31607	1.25598	2	Gorai.008G051000	___NoMatchedTerm___
Gorai.007G367400-JGI_221_v2.1	2.38318	0.332217	2	Gorai.007G367400	___NoMatchedTerm___
Gorai.007G260400-JGI_221_v2.1	2.24568	0.402606	2	Gorai.007G260400	___NoMatchedTerm___
Gorai.007G218000-JGI_221_v2.1	2.01121	0.00206831	2	Gorai.007G218000	___NoMatchedTerm___
Gorai.007G104200-JGI_221_v2.1	2.12015	0.837745	2	Gorai.007G104200	___NoMatchedTerm___
Gorai.007G086600-JGI_221_v2.1	2.5676	1.24902	2	Gorai.007G086600	___NoMatchedTerm___
Gorai.007G044700-JGI_221_v2.1	2.62419	0.386665	2	Gorai.007G044700	___NoMatchedTerm___
Gorai.007G036600-JGI_221_v2.1	2.2813	0.77516	2	Gorai.007G036600	___NoMatchedTerm___
Gorai.007G012900-JGI_221_v2.1	2.48853	0.606839	2	Gorai.007G012900	___NoMatchedTerm___
Gorai.007G001800-JGI_221_v2.1	2.62419	-0.160823	2	Gorai.007G001800	gi|281428052|gb|GU244349.1|_Gossypium_arboreum_MYB_transcription_factor_(MYB)_gene,_complete_cds
Gorai.006G253400-JGI_221_v2.1	2.18678	0.976073	2	Gorai.006G253400	___NoMatchedTerm___
Gorai.006G245800-JGI_221_v2.1	2.79822	0.6451	2	Gorai.006G245800	gi|519708175|gb|JX601633.1|_Gossypium_hirsutum_clone_NBRI_GE39898_microsatellite_sequence
Gorai.006G224600-JGI_221_v2.1	1.18678	0.393617	2	Gorai.006G224600	___NoMatchedTerm___
Gorai.006G125100-JGI_221_v2.1	1.7311	0.880654	2	Gorai.006G125100	___NoMatchedTerm___
Gorai.006G073300-JGI_221_v2.1	2.29298	1.15819	2	Gorai.006G073300	gi|519693923|gb|JX587818.1|_Gossypium_hirsutum_clone_NBRI_GE22062_microsatellite_sequence
Gorai.006G003600-JGI_221_v2.1	2.50871	0.595251	2	Gorai.006G003600	___NoMatchedTerm___
Gorai.005G247900-JGI_221_v2.1	2.17168	1.27082	2	Gorai.005G247900	___NoMatchedTerm___
Gorai.005G235100-JGI_221_v2.1	2.24568	0.676171	2	Gorai.005G235100	___NoMatchedTerm___
Gorai.005G234600-JGI_221_v2.1	2.44731	-0.02142	2	Gorai.005G234600	___NoMatchedTerm___
Gorai.005G188900-JGI_221_v2.1	2.5676	1.23911	2	Gorai.005G188900	___NoMatchedTerm___
Gorai.005G046100-JGI_221_v2.1	2.38318	-0.323829	2	Gorai.005G046100	___NoMatchedTerm___
Gorai.004G275100-JGI_221_v2.1	2.01121	0.284911	2	Gorai.004G275100	gi|312032587|gb|AC243155.1|_Gossypium_hirsutum_clone_MX115K12-joo,_complete_sequence
Gorai.004G120800-JGI_221_v2.1	2.40918	0.943652	2	Gorai.004G120800	___NoMatchedTerm___
Gorai.004G024100-JGI_221_v2.1	2.62419	1.31573	2	Gorai.004G024100	gi|519683427|gb|JX577322.1|_Gossypium_hirsutum_clone_NBRI_GE9121_microsatellite_sequence
Gorai.004G018600-JGI_221_v2.1	2.30226	1.00833	2	Gorai.004G018600	___NoMatchedTerm___
Gorai.003G182100-JGI_221_v2.1	2.02808	1.31573	2	Gorai.003G182100	gi|317174489|gb|HQ526708.1|_Gossypium_herbaceum_clone_NBRI_C_EYT27PB01AXNQC_simple_sequence_repeat_marker,_mRNA_sequence
Gorai.003G116700-JGI_221_v2.1	2.62419	0.431753	2	Gorai.003G116700	___NoMatchedTerm___
Gorai.003G114000-JGI_221_v2.1	2.24568	0.715546	2	Gorai.003G114000	gi|229597363|gb|FJ915120.1|_Gossypium_hirsutum_vacuolar_invertase_mRNA,_complete_cds
Gorai.003G100300-JGI_221_v2.1	2.01121	1.03917	2	Gorai.003G100300	___NoMatchedTerm___
Gorai.003G078600-JGI_221_v2.1	2.29879	1.30184	2	Gorai.003G078600	gi|529071396|gb|JX964674.1|_Gossypium_hirsutum_clone_NBRI_TRANS-943_microsatellite_sequence
Gorai.003G011700-JGI_221_v2.1	1.38318	-0.182356	2	Gorai.003G011700	___NoMatchedTerm___
Gorai.002G257800-JGI_221_v2.1	1.83064	1.15819	2	Gorai.002G257800	___NoMatchedTerm___
Gorai.002G234400-JGI_221_v2.1	2.14614	1.3095	2	Gorai.002G234400	gi|519747918|gb|JX615234.1|_Gossypium_hirsutum_clone_NBRI_GE59120_microsatellite_sequence
Gorai.002G111000-JGI_221_v2.1	2.01121	0.502142	2	Gorai.002G111000	gi|519687691|gb|JX581586.1|_Gossypium_hirsutum_clone_NBRI_GE14248_microsatellite_sequence
Gorai.002G004300-JGI_221_v2.1	2.03923	1.03266	2	Gorai.002G004300	___NoMatchedTerm___
Gorai.001G247500-JGI_221_v2.1	1.4018	0.810264	2	Gorai.001G247500	___NoMatchedTerm___
Gorai.001G244400-JGI_221_v2.1	2.09367	-0.0828206	2	Gorai.001G244400	___NoMatchedTerm___
Gorai.001G228900-JGI_221_v2.1	2.12538	0.353279	2	Gorai.001G228900	___NoMatchedTerm___
Gorai.001G156700-JGI_221_v2.1	2.03923	0.154219	2	Gorai.001G156700	___NoMatchedTerm___
Gorai.001G135700-JGI_221_v2.1	2.02328	0.621724	2	Gorai.001G135700	___NoMatchedTerm___
Gorai.001G092400-JGI_221_v2.1	2.1332	0.858286	2	Gorai.001G092400	gi|519686411|gb|JX580306.1|_Gossypium_hirsutum_clone_NBRI_GE12711_microsatellite_sequence
Gorai.001G086600-JGI_221_v2.1	1.2813	0.917179	2	Gorai.001G086600	___NoMatchedTerm___
Gorai.001G048300-JGI_221_v2.1	2.50871	0.949601	2	Gorai.001G048300	___NoMatchedTerm___
Gorai.N024700-JGI_221_v2.1	2.09367	-0.305213	2	Gorai.N024700	___NoMatchedTerm___
Gorai.013G271000-JGI_221_v2.1	2.38318	0.279749	2	Gorai.013G271000	___NoMatchedTerm___
Gorai.013G076200-JGI_221_v2.1	2.7311	-2.08282	2	Gorai.013G076200	___NoMatchedTerm___
Gorai.013G067400-JGI_221_v2.1	2.7311	0.747254	2	Gorai.013G067400	___NoMatchedTerm___
Gorai.013G042200-JGI_221_v2.1	1.24568	0.917179	2	Gorai.013G042200	___NoMatchedTerm___
Gorai.012G061500-JGI_221_v2.1	2.50871	1.29569	2	Gorai.012G061500	gi|519707344|gb|JX600802.1|_Gossypium_hirsutum_clone_NBRI_GE38769_microsatellite_sequence
Gorai.011G183200-JGI_221_v2.1	1.98264	-1.08282	2	Gorai.011G183200	___NoMatchedTerm___
Gorai.011G164300-JGI_221_v2.1	2.17168	0.239108	2	Gorai.011G164300	___NoMatchedTerm___
Gorai.011G080300-JGI_221_v2.1	2.24568	0.332217	2	Gorai.011G080300	___NoMatchedTerm___
Gorai.011G037900-JGI_221_v2.1	2.5676	0.431753	2	Gorai.011G037900	gi|1706955|gb|U58283.1|GHU58283_Gossypium_hirsutum_cellulose_synthase_(celA1)_mRNA,_complete_cds
Gorai.010G189400-JGI_221_v2.1	2.09367	0.917179	2	Gorai.010G189400	gi|519749350|gb|JX616005.1|_Gossypium_hirsutum_clone_NBRI_GE60343_microsatellite_sequence
Gorai.010G056400-JGI_221_v2.1	2.38318	1.0871	2	Gorai.010G056400	___NoMatchedTerm___
Gorai.010G054200-JGI_221_v2.1	1.7311	0.239108	2	Gorai.010G054200	___NoMatchedTerm___
Gorai.010G041400-JGI_221_v2.1	1.92375	0.654145	2	Gorai.010G041400	___NoMatchedTerm___
Gorai.009G419300-JGI_221_v2.1	1.38318	0.765176	2	Gorai.009G419300	gi|519689272|gb|JX583167.1|_Gossypium_hirsutum_clone_NBRI_GE16145_microsatellite_sequence
Gorai.009G417900-JGI_221_v2.1	2.24568	0.402606	2	Gorai.009G417900	___NoMatchedTerm___
Gorai.009G368000-JGI_221_v2.1	2.09367	-0.0828206	2	Gorai.009G368000	gi|317174797|gb|HQ527016.1|_Gossypium_herbaceum_clone_NBRI_B_4585_simple_sequence_repeat_marker,_mRNA_sequence
Gorai.009G318700-JGI_221_v2.1	2.7311	1.23911	2	Gorai.009G318700	___NoMatchedTerm___
Gorai.009G306000-JGI_221_v2.1	2.09367	1.23911	2	Gorai.009G306000	___NoMatchedTerm___
Gorai.009G252700-JGI_221_v2.1	1.14614	0.332217	2	Gorai.009G252700	___NoMatchedTerm___
Gorai.009G159700-JGI_221_v2.1	2.31356	-0.252746	2	Gorai.009G159700	___NoMatchedTerm___
Gorai.009G109700-JGI_221_v2.1	2.38318	-0.0828206	2	Gorai.009G109700	gi|519694425|gb|JX588320.1|_Gossypium_hirsutum_clone_NBRI_GE22715_microsatellite_sequence
Gorai.009G022500-JGI_221_v2.1	2.50871	0.694787	2	Gorai.009G022500	gi|519691347|gb|JX585242.1|_Gossypium_hirsutum_clone_NBRI_GE18755_microsatellite_sequence
Gorai.009G016000-JGI_221_v2.1	2.7311	0.917179	2	Gorai.009G016000	gi|519695004|gb|JX588899.1|_Gossypium_hirsutum_clone_NBRI_GE23464_microsatellite_sequence
Gorai.009G013300-JGI_221_v2.1	2.09367	-0.0828206	2	Gorai.009G013300	___NoMatchedTerm___
Gorai.008G281700-JGI_221_v2.1	1.24568	0.279749	2	Gorai.008G281700	gi|256537809|gb|GQ394864.1|_Gossypium_hirsutum_cultivar_Delta_Opal_clone_MONCS1887_SSR_marker_DPL0130_genomic_sequence
Gorai.008G269100-JGI_221_v2.1	2.7311	-0.975905	2	Gorai.008G269100	___NoMatchedTerm___
Gorai.008G199400-JGI_221_v2.1	2.31356	-0.0828206	2	Gorai.008G199400	gi|519694820|gb|JX588715.1|_Gossypium_hirsutum_clone_NBRI_GE23220_microsatellite_sequence
Gorai.007G349600-JGI_221_v2.1	2.09367	1.00464	2	Gorai.007G349600	___NoMatchedTerm___
Gorai.007G276300-JGI_221_v2.1	2.09367	0.279749	2	Gorai.007G276300	gi|519714810|gb|JX605133.1|_Gossypium_hirsutum_clone_NBRI_GE44660_microsatellite_sequence
Gorai.007G197800-JGI_221_v2.1	2.09367	0.554609	2	Gorai.007G197800	gi|519750614|gb|JX616675.1|_Gossypium_hirsutum_clone_NBRI_GE61509_microsatellite_sequence
Gorai.007G175700-JGI_221_v2.1	2.38318	-0.720251	2	Gorai.007G175700	___NoMatchedTerm___
Gorai.007G123200-JGI_221_v2.1	2.09367	0.705675	2	Gorai.007G123200	gi|317172618|gb|HQ524837.1|_Gossypium_herbaceum_clone_NBRI_B2_1828_simple_sequence_repeat_marker,_mRNA_sequence
Gorai.007G051400-JGI_221_v2.1	2.31356	-0.0828206	2	Gorai.007G051400	___NoMatchedTerm___
Gorai.007G031800-JGI_221_v2.1	2.31607	-0.734897	2	Gorai.007G031800	___NoMatchedTerm___
Gorai.007G018200-JGI_221_v2.1	1.09367	0.109824	2	Gorai.007G018200	___NoMatchedTerm___
Gorai.006G211000-JGI_221_v2.1	2.09367	0.724534	2	Gorai.006G211000	gi|519762982|gb|JX622600.1|_Gossypium_hirsutum_clone_NBRI_GE69404_microsatellite_sequence
Gorai.005G138100-JGI_221_v2.1	2.24568	0.447694	2	Gorai.005G138100	gi|383932345|gb|JQ837701.1|_Gossypium_hirsutum_cultivar_ZM3_RAV_mRNA,_complete_cds
Gorai.005G110700-JGI_221_v2.1	2.24568	0.595251	2	Gorai.005G110700	gi|519684121|gb|JX578016.1|_Gossypium_hirsutum_clone_NBRI_GE9953_microsatellite_sequence
Gorai.005G094200-JGI_221_v2.1	2.24568	1.37661	2	Gorai.005G094200	___NoMatchedTerm___
Gorai.005G044100-JGI_221_v2.1	1.33879	0.332217	2	Gorai.005G044100	___NoMatchedTerm___
Gorai.004G168800-JGI_221_v2.1	2.50871	1.0871	2	Gorai.004G168800	___NoMatchedTerm___
Gorai.003G176600-JGI_221_v2.1	1.7311	1.19729	2	Gorai.003G176600	___NoMatchedTerm___
Gorai.003G099100-JGI_221_v2.1	2.62419	0.917179	2	Gorai.003G099100	gi|317174604|gb|HQ526823.1|_Gossypium_herbaceum_clone_NBRI_E_EYT27PB03GSA2I_simple_sequence_repeat_marker,_mRNA_sequence
Gorai.002G236200-JGI_221_v2.1	2.7311	0.502142	2	Gorai.002G236200	___NoMatchedTerm___
Gorai.002G062000-JGI_221_v2.1	2.09367	0.917179	2	Gorai.002G062000	gi|472315820|gb|JX448620.1|_Gossypium_hirsutum_cotton_galactosyltransferase_1_(GalT1)_mRNA,_complete_cds
Gorai.002G026700-JGI_221_v2.1	2.09367	0.502142	2	Gorai.002G026700	gi|519688814|gb|JX582709.1|_Gossypium_hirsutum_clone_NBRI_GE15594_microsatellite_sequence
Gorai.001G118200-JGI_221_v2.1	1.38318	-0.0828206	2	Gorai.001G118200	___NoMatchedTerm___
Gorai.001G100600-JGI_221_v2.1	2.31356	0.279749	2	Gorai.001G100600	___NoMatchedTerm___
Gorai.001G019500-JGI_221_v2.1	2.01121	0.502142	2	Gorai.001G019500	___NoMatchedTerm___
Gorai.013G272600-JGI_221_v2.1	1.7286	-0.404749	2	Gorai.013G272600	___NoMatchedTerm___
Gorai.013G210700-JGI_221_v2.1	2.31356	0.726202	2	Gorai.013G210700	___NoMatchedTerm___
Gorai.013G192600-JGI_221_v2.1	2.31356	-0.0828206	2	Gorai.013G192600	___NoMatchedTerm___
Gorai.013G182600-JGI_221_v2.1	1.7286	-1.08282	2	Gorai.013G182600	___NoMatchedTerm___
Gorai.013G096800-JGI_221_v2.1	2.31356	0.726202	2	Gorai.013G096800	___NoMatchedTerm___
Gorai.013G052600-JGI_221_v2.1	2.7286	0.917179	2	Gorai.013G052600	___NoMatchedTerm___
Gorai.012G159700-JGI_221_v2.1	2.31356	-0.809023	2	Gorai.012G159700	___NoMatchedTerm___
Gorai.012G093000-JGI_221_v2.1	1.7286	0	2	Gorai.012G093000	gi|519690683|gb|JX584578.1|_Gossypium_hirsutum_clone_NBRI_GE17920_microsatellite_sequence
Gorai.012G054100-JGI_221_v2.1	1.7286	0.726202	2	Gorai.012G054100	___NoMatchedTerm___
Gorai.012G033900-JGI_221_v2.1	2.31356	-0.0828206	2	Gorai.012G033900	___NoMatchedTerm___
Gorai.012G015700-JGI_221_v2.1	2.31356	0.917179	2	Gorai.012G015700	gi|519696951|gb|JX590846.1|_Gossypium_hirsutum_clone_NBRI_GE25848_microsatellite_sequence
Gorai.011G232300-JGI_221_v2.1	2.31356	0.726202	2	Gorai.011G232300	gi|317174743|gb|HQ526962.1|_Gossypium_herbaceum_clone_NBRI_B2_1897_simple_sequence_repeat_marker,_mRNA_sequence
Gorai.011G231200-JGI_221_v2.1	2.31356	0.726202	2	Gorai.011G231200	gi|519706265|gb|JX599723.1|_Gossypium_hirsutum_clone_NBRI_GE37318_microsatellite_sequence
Gorai.011G215900-JGI_221_v2.1	2.31356	-0.0828206	2	Gorai.011G215900	___NoMatchedTerm___
Gorai.011G185200-JGI_221_v2.1	2.7286	-2.08282	2	Gorai.011G185200	gi|312032561|gb|AC243128.1|_Gossypium_raimondii_clone_GR__Ba0229A16-hoh,_complete_sequence
Gorai.011G182200-JGI_221_v2.1	2.31356	0	2	Gorai.011G182200	___NoMatchedTerm___
Gorai.011G170700-JGI_221_v2.1	2.31356	-0.0828206	2	Gorai.011G170700	___NoMatchedTerm___
Gorai.011G151400-JGI_221_v2.1	1.24568	0	2	Gorai.011G151400	gi|519746511|gb|JX614618.1|_Gossypium_hirsutum_clone_NBRI_GE58147_microsatellite_sequence
Gorai.011G121000-JGI_221_v2.1	2.31356	0.917179	2	Gorai.011G121000	gi|519737270|gb|JX611000.1|_Gossypium_hirsutum_clone_NBRI_GE52942_microsatellite_sequence
Gorai.011G099600-JGI_221_v2.1	2.7286	-1.08282	2	Gorai.011G099600	___NoMatchedTerm___
Gorai.011G067500-JGI_221_v2.1	1.7286	0.502142	2	Gorai.011G067500	gi|317175205|gb|HQ527424.1|_Gossypium_herbaceum_clone_NBRI_B2_1666_simple_sequence_repeat_marker,_mRNA_sequence
Gorai.011G007400-JGI_221_v2.1	2.7286	0	2	Gorai.011G007400	___NoMatchedTerm___
Gorai.010G242900-JGI_221_v2.1	1.7286	0.726202	2	Gorai.010G242900	gi|1087112|gb|S79309.1|_Rac9=21.5_kda_GTP-binding_protein_[Gossypium_hirsutum=cotton_plants,_cv._Acala_SJ-2,_boll_fibers,_mRNA_Partial,_840_nt]
Gorai.010G140600-JGI_221_v2.1	1.7286	0.726202	2	Gorai.010G140600	___NoMatchedTerm___
Gorai.010G119100-JGI_221_v2.1	2.31356	1.23911	2	Gorai.010G119100	___NoMatchedTerm___
Gorai.010G106200-JGI_221_v2.1	1.7286	-0.809023	2	Gorai.010G106200	___NoMatchedTerm___
Gorai.010G050800-JGI_221_v2.1	1.7286	-0.809023	2	Gorai.010G050800	___NoMatchedTerm___
Gorai.010G016800-JGI_221_v2.1	2.7286	0.917179	2	Gorai.010G016800	gi|519715719|gb|JX605454.1|_Gossypium_hirsutum_clone_NBRI_GE45116_microsatellite_sequence
Gorai.009G389300-JGI_221_v2.1	2.31356	0.726202	2	Gorai.009G389300	___NoMatchedTerm___
Gorai.009G322900-JGI_221_v2.1	1.62419	0	2	Gorai.009G322900	___NoMatchedTerm___
Gorai.009G309900-JGI_221_v2.1	2.31356	0.917179	2	Gorai.009G309900	___NoMatchedTerm___
Gorai.009G309700-JGI_221_v2.1	1.7286	0.917179	2	Gorai.009G309700	___NoMatchedTerm___
Gorai.009G286000-JGI_221_v2.1	2.7286	-0.0828206	2	Gorai.009G286000	___NoMatchedTerm___
Gorai.009G268500-JGI_221_v2.1	1.09367	-0.0828206	2	Gorai.009G268500	___NoMatchedTerm___
Gorai.009G210800-JGI_221_v2.1	2.31356	-0.0828206	2	Gorai.009G210800	___NoMatchedTerm___
Gorai.009G137600-JGI_221_v2.1	1.7286	0.726202	2	Gorai.009G137600	___NoMatchedTerm___
Gorai.009G116300-JGI_221_v2.1	2.31356	0.917179	2	Gorai.009G116300	___NoMatchedTerm___
Gorai.009G026500-JGI_221_v2.1	2.31356	0.917179	2	Gorai.009G026500	gi|519745658|gb|JX614270.1|_Gossypium_hirsutum_clone_NBRI_GE57540_microsatellite_sequence
Gorai.008G287500-JGI_221_v2.1	2.7286	-0.0828206	2	Gorai.008G287500	gi|519687629|gb|JX581524.1|_Gossypium_hirsutum_clone_NBRI_GE14174_microsatellite_sequence
Gorai.008G261100-JGI_221_v2.1	2.24568	-0.0828206	2	Gorai.008G261100	gi|312032547|gb|AC243114.1|_Gossypium_raimondii_clone_GR__Ba0041F12-jfm,_complete_sequence
Gorai.008G253400-JGI_221_v2.1	2.7286	0.917179	2	Gorai.008G253400	gi|519686155|gb|JX580050.1|_Gossypium_hirsutum_clone_NBRI_GE12408_microsatellite_sequence
Gorai.008G232000-JGI_221_v2.1	2.31356	0.917179	2	Gorai.008G232000	gi|519683996|gb|JX577891.1|_Gossypium_hirsutum_clone_NBRI_GE9799_microsatellite_sequence
Gorai.008G218500-JGI_221_v2.1	1.7286	0.917179	2	Gorai.008G218500	gi|312032579|gb|AC243146.1|_Gossypium_hirsutum_clone_MX073K14-jni,_complete_sequence
Gorai.008G214700-JGI_221_v2.1	1.7286	0.917179	2	Gorai.008G214700	___NoMatchedTerm___
Gorai.008G178700-JGI_221_v2.1	2.31356	0.726202	2	Gorai.008G178700	gi|295687226|gb|GU295062.1|_Gossypium_hirsutum_eukaryotic_translation_initiation_factor_5A_mRNA,_complete_cds
Gorai.008G176400-JGI_221_v2.1	2.31356	0.726202	2	Gorai.008G176400	___NoMatchedTerm___
Gorai.008G157400-JGI_221_v2.1	1.7286	0.726202	2	Gorai.008G157400	___NoMatchedTerm___
Gorai.008G069500-JGI_221_v2.1	1.7286	0.726202	2	Gorai.008G069500	___NoMatchedTerm___
Gorai.008G059100-JGI_221_v2.1	1.09367	-0.0828206	2	Gorai.008G059100	___NoMatchedTerm___
Gorai.007G357500-JGI_221_v2.1	2.31356	0	2	Gorai.007G357500	gi|52140161|gb|AY600431.1|_Gossypium_hirsutum_isolate_2_O05_NBS-LRR_resistance_protein-like_gene,_partial_sequence
Gorai.007G293000-JGI_221_v2.1	1.24568	0.595251	2	Gorai.007G293000	gi|519703503|gb|JX597283.1|_Gossypium_hirsutum_clone_NBRI_GE34123_microsatellite_sequence
Gorai.007G289800-JGI_221_v2.1	2.7286	-0.345855	2	Gorai.007G289800	___NoMatchedTerm___
Gorai.007G281900-JGI_221_v2.1	2.31356	0	2	Gorai.007G281900	gi|519744540|gb|JX613904.1|_Gossypium_hirsutum_clone_NBRI_GE57000_microsatellite_sequence
Gorai.007G205100-JGI_221_v2.1	2.31356	0	2	Gorai.007G205100	___NoMatchedTerm___
Gorai.007G130700-JGI_221_v2.1	1.7286	0	2	Gorai.007G130700	___NoMatchedTerm___
Gorai.007G083700-JGI_221_v2.1	1.50871	0.726202	2	Gorai.007G083700	___NoMatchedTerm___
Gorai.007G076900-JGI_221_v2.1	2.7286	-1.08282	2	Gorai.007G076900	___NoMatchedTerm___
Gorai.007G074900-JGI_221_v2.1	1.7286	0.726202	2	Gorai.007G074900	gi|519749842|gb|JX616282.1|_Gossypium_hirsutum_clone_NBRI_GE60821_microsatellite_sequence
Gorai.007G022000-JGI_221_v2.1	1.7286	0	2	Gorai.007G022000	___NoMatchedTerm___
Gorai.006G163600-JGI_221_v2.1	2.31356	0.917179	2	Gorai.006G163600	___NoMatchedTerm___
Gorai.006G138700-JGI_221_v2.1	1.7286	0.726202	2	Gorai.006G138700	gi|519685201|gb|JX579096.1|_Gossypium_hirsutum_clone_NBRI_GE11269_microsatellite_sequence
Gorai.006G099300-JGI_221_v2.1	1.7286	0	2	Gorai.006G099300	___NoMatchedTerm___
Gorai.006G012500-JGI_221_v2.1	1.7286	-0.809023	2	Gorai.006G012500	___NoMatchedTerm___
Gorai.006G007300-JGI_221_v2.1	2.7286	-0.0828206	2	Gorai.006G007300	___NoMatchedTerm___
Gorai.005G252700-JGI_221_v2.1	2.31356	0.917179	2	Gorai.005G252700	___NoMatchedTerm___
Gorai.005G141800-JGI_221_v2.1	1.7286	-0.809023	2	Gorai.005G141800	gi|519694838|gb|JX588733.1|_Gossypium_hirsutum_clone_NBRI_GE23241_microsatellite_sequence
Gorai.005G081700-JGI_221_v2.1	1.7286	-0.0828206	2	Gorai.005G081700	gi|1220195|gb|U49061.1|GHU49061_Gossypium_hirsutum_alcohol_dehydrogenase_2a_mRNA,_complete_cds
Gorai.004G288100-JGI_221_v2.1	2.7286	-0.0828206	2	Gorai.004G288100	___NoMatchedTerm___
Gorai.004G229700-JGI_221_v2.1	1.7286	-0.0828206	2	Gorai.004G229700	___NoMatchedTerm___
Gorai.004G165300-JGI_221_v2.1	1.7286	-0.0828206	2	Gorai.004G165300	gi|519687446|gb|JX581341.1|_Gossypium_hirsutum_clone_NBRI_GE13951_microsatellite_sequence
Gorai.004G099400-JGI_221_v2.1	2.31356	0.239108	2	Gorai.004G099400	___NoMatchedTerm___
Gorai.004G092900-JGI_221_v2.1	1.7286	-0.0828206	2	Gorai.004G092900	___NoMatchedTerm___
Gorai.004G021900-JGI_221_v2.1	2.31356	0.726202	2	Gorai.004G021900	___NoMatchedTerm___
Gorai.003G171400-JGI_221_v2.1	1.7286	-0.0828206	2	Gorai.003G171400	___NoMatchedTerm___
Gorai.003G152900-JGI_221_v2.1	2.31356	0.726202	2	Gorai.003G152900	___NoMatchedTerm___
Gorai.003G079100-JGI_221_v2.1	1.7286	0.726202	2	Gorai.003G079100	gi|519752945|gb|JX617751.1|_Gossypium_hirsutum_clone_NBRI_GE62976_microsatellite_sequence
Gorai.003G065000-JGI_221_v2.1	2.7286	0.332217	2	Gorai.003G065000	___NoMatchedTerm___
Gorai.003G059400-JGI_221_v2.1	2.31356	1.23911	2	Gorai.003G059400	___NoMatchedTerm___
Gorai.003G048100-JGI_221_v2.1	1.7286	-0.0828206	2	Gorai.003G048100	___NoMatchedTerm___
Gorai.003G009300-JGI_221_v2.1	2.31356	-0.809023	2	Gorai.003G009300	___NoMatchedTerm___
Gorai.002G268500-JGI_221_v2.1	2.31356	0.502142	2	Gorai.002G268500	gi|312032507|gb|AC243074.1|_Gossypium_arboreum_clone_GAH006G07-jlu,_complete_sequence
Gorai.002G139600-JGI_221_v2.1	1.7286	0.726202	2	Gorai.002G139600	___NoMatchedTerm___
Gorai.002G041300-JGI_221_v2.1	1.7286	-0.809023	2	Gorai.002G041300	gi|519752670|gb|JX617578.1|_Gossypium_hirsutum_clone_NBRI_GE62760_microsatellite_sequence
Gorai.001G271800-JGI_221_v2.1	2.7286	-1.80902	2	Gorai.001G271800	___NoMatchedTerm___
Gorai.001G223200-JGI_221_v2.1	3.05053	-2.39399	2	Gorai.001G223200	___NoMatchedTerm___
Gorai.001G210200-JGI_221_v2.1	2.31356	0.332217	2	Gorai.001G210200	gi|114795518|gb|DQ908251.1|_Gossypium_hirsutum_clone_LIB5327-030-A1-N1-G9_Gh311_microsatellite_sequence
Gorai.001G209100-JGI_221_v2.1	1.7286	-0.0828206	2	Gorai.001G209100	___NoMatchedTerm___
Gorai.001G204100-JGI_221_v2.1	1.7286	-0.809023	2	Gorai.001G204100	gi|114795345|gb|DQ908079.1|_Gossypium_hirsutum_clone_LIB5327-019-A1-N1-H1_PS_Gh137_microsatellite_sequence
Gorai.001G168600-JGI_221_v2.1	1.7286	-0.0828206	2	Gorai.001G168600	gi|519703866|gb|JX597646.1|_Gossypium_hirsutum_clone_NBRI_GE34585_microsatellite_sequence
Gorai.001G099200-JGI_221_v2.1	2.7286	0.917179	2	Gorai.001G099200	___NoMatchedTerm___
Gorai.001G073000-JGI_221_v2.1	2.31356	0.502142	2	Gorai.001G073000	___NoMatchedTerm___
Gorai.001G071500-JGI_221_v2.1	2.7286	0.239108	2	Gorai.001G071500	gi|519690250|gb|JX584145.1|_Gossypium_hirsutum_clone_NBRI_GE17364_microsatellite_sequence
Gorai.001G034000-JGI_221_v2.1	1.7286	0.726202	2	Gorai.001G034000	gi|519691536|gb|JX585431.1|_Gossypium_hirsutum_clone_NBRI_GE18991_microsatellite_sequence
Gorai.N000900-JGI_221_v2.1	2.31356	0	2	Gorai.N000900	___NoMatchedTerm___
Gorai.013G237600-JGI_221_v2.1	2.31356	0.726202	2	Gorai.013G237600	___NoMatchedTerm___
Gorai.013G089600-JGI_221_v2.1	2.31356	0.726202	2	Gorai.013G089600	___NoMatchedTerm___
[truncated: 11,387 more rows]
